# Supplementary material for: An empirical study of race times in recreational endurance runners
Source: BMC Sports Sci Med Rehabil. 2016 Aug 26;8(1):26. doi: 10.1186/s13102-016-0052-y (PMC5000509; doi:10.1186/s13102-016-0052-y)
Supplement: Supplementary file 2 — Master Data Predicting Races Times Final. (XLSX 377 kb) [file 13102_2016_52_MOESM2_ESM.xlsx]

## Sheet: Sheet1
id	adjusted	age	bmi	cohort1	cohort2	cohort3	cohort4	endurancecat	endurancespeed	female	footwear	group	injury	k5_d	k5_di	k5_ti	k5_ti_adj	k5_tr	k10_d	k10_di	k10_ti	k10_ti_adj	k10_tr	m5_d	m5_di	m5_ti	m5_ti_adj	m5_tr	m10_d	m10_di	m10_ti	m10_ti_adj	m10_tr	mh_d	mh_di	mh_ti	mh_ti_adj	mh_tr	mf_d	mf_di	mf_ti	mf_ti_adj	mf_tr	max	sprint	tempo	typical	model1_time	model2_time
1	1	25	21.6221					1	2	1	2	2	1						10000	4	2798	2860.48	2						16090	4	4612	4798.81	2	21097.5	2	6320	6257.03	2						47	1	0	30
2	1	41	23.906					1	2	0	2	2	1	5000	3	1210	1210	2																21097.5	4	5510	5654.48	1						28	1	1	23
3	1	25	21.6407					2	3	0	2	2	1	5000	3	994	994	2																21097.5	3	4520	4520	2						70	1	1	50
4	1	35	23.5923	1				2	5	0	2	1	2	5000	3	1075	1075	1	10000	5	2135		1																42195	4	10295	10399	1	60	1	1	50
5	1	34	22.7064					2	3	0	2	1	1	5000	3	1186	1186	1											16090	4	4120	4268.44	3	21097.5	3	5475	5475	2						15	0	0	8
6	1	45	42.0875					1	1	1	2	2	2	5000	3	3240	3240	2																21097.5	3	13500	13500	2						15	0	1	10
7	1	33	22.5183	1	1	1	1	2	3	0	2	2	2	5000	4	1292	1299.99	3																21097.5	3	5760	5760	2	42195	3	12292	12292	2	50	0	0	40
8	1	58	25.2341					2	3	0	1	2	3						10000	4	3420	3513.82	2											21097.5	3	7680	7680	2						35	0	0	25
9	1	29	24.5054					2	5	0	1	3	2	5000	3	1440	1440	2	10000	3	3240	3240	2											21097.5	3	7320	7320	3						36	0	0	20
10	1	36	25.4086					1	2	1	2	1	1	5000	3	2115	2115	3	10000	2	4210	4166.92	2											21097.5	2	9180	9047.73	1						36	0	0	20
11	1	54	26.4017					1	2	0	2	3	1	5000	3	1560	1560	2	10000	2	3360	3332.5	2																					18	0	0	16
12	1	38	25.5603	1				1	2	0	2	3	1						10000	2	2580	2563.76	3																42195	4	10980	11098.4	1	65	0	1	50	206.163
13	1	34	22.6079	1	1			1	2	0	2	1	1																16090	1	3896		1	21097.5	3	4995	4995	2	42195	3	10694	10694	2	88	1	1	80
14	1	39	24.9748	1	1	1	1	3	6	0	2	1	1	5000	4	1222	1229.14	1																21097.5	4	5884	6049.05	1	42195	2	13452	13387.7	1	51	0	1	40
15	1	29	25.9516					2	3	0	1	2	2						10000	3	3720	3720	2											21097.5	3	8460	8460	2						122	0	0	16
16	1	23	20.8699					2	3	1	2	3	3	5000	3	1690	1690	3																21097.5	2	8193	8087.48	2						8	0	0	18
17	1	33	24.3018	1	1			2	3	1	2	2	1																					21097.5	3	7142	7142	2	42195	3	14940	14940	2	40	0	0	30
18	1	38	24.5511					2	3	0	2	1	1						10000	3	2730	2730	2						16090	2	4620	4487.19	2											53	0	0	40
19	1	20	22.9048					1	1	0	1	2	1	5000	4	893	896.809	2											16090	3	3499	3499	2						42195	1	9515		2	125	1	1	80
20	1	34	24.57	1	1			3	8	0	1	3	1																					21097.5	3	4706	4706	1	42195	3	10747	10747	1	75	1	1	65	170.454
21	1	33	27.9773					1	2	0	2	2	1	5000	3	1625	1625	2	10000	2	3978	3939.51	2																					6	0	0	4
22	1	53	23.1677	1		1		2	4	0	2	1	1	5000	4	1050	1055.27	1											16090	4	3720	3840.59	2						42195	3	10875	10875	2	45	1	1	35
23	1	27	25.2478					2	3	0	2	3	1	5000	4	2412	2439.99	3	10000	4	4320	4470.78	3																					12	0	0	8
24	1	32	29.2184					1	2	0	2	3	2						10000	3	2588	2588	2											21097.5	4	5643	5794.63	2						50	0	1	30
25	1	34	23.5826	1	1	1	1	1	2	1	2	2	1	5000	2	1603	1546.98	2																21097.5	4	7140	7384.5	2	42195	3	16580	16580	1	39	0	0	20
26	1	44	20.0351	1	1	1	1	1	2	1	2	3	1	5000	3	1457	1457	2																21097.5	2	7260	7177.02	2	42195	2	15440	15355.3	1	45	1	1	35	259.362	263.277
27	1	27	29.8836	1	1			2	3	0	1	1	1																					21097.5	3	6672	6672	2	42195	4	14430	14635.2	1	28	1	1	18
28	1	36	23.9069					2	3	0	2	3	1	5000	3	1160	1160	1	10000	4	2430	2476.99	2											21097.5	3	5369	5369	1						51	1	1	40
29	1	53	21.5213					2	3	0	2	2	3	5000	3	1166	1166	2																21097.5	3	5226	5226	1						62	1	1	55
30	1	33	28.8543					1	1	0	2	3	3	5000	4	1571	1582.83	2	10000	2	3256	3230.17	2											21097.5	4	7722	8008.78	2						30	0	0	20
31	1	27	21.3856	1	1	1	1	2	4	0	2	2	1											8045	3	1615	1615	2						21097.5	3	4375	4375	2	42195	2	9475	9443.05	2	110	1	0	90
32	1	40	19.6603					2	3	1	2	2	1	5000	3	1753	1753	1						8045	4	2738	2890.47	1						21097.5	3	8314	8314	1						17	1	1	12
33	1	34	25.9689					2	5	0	2	3	1						10000	3	3395	3395	2	8045	3	2690	2690	2																7.3	1	0	15
34	1	39	29.7374	1				2	3	0	2	1	2	5000	3	1256	1256	2											16090	1	4639		2						42195	4	13113	13282.2	2	52	0	1	42
35	1	43	23.3717					2	3	0	2	2	1	5000	4	1255	1262.54	2	10000	3	2655	2655	2																					22	1	0	15
36	1	32	24.2882					3	8	0	2	2	1	5000	3	1060	1060	3																21097.5	2	4966	4927.04	2						50	1	1	42
37	1	32	29.2178	1	1	1	1	2	3	1	2	3	1	5000	4	1572	1583.84	1																21097.5	3	7153	7153	1	42195	2	17190	17085.1	1	55	0	0	50	249.767	261.162
38	1	41	22.3776					2	3	1	2	1	1	5000	4	1558	1569.63	3																21097.5	4	7115	7357.76	3						35	0	0	30
39	1	24	21.7049	1	1	1	1	2	4	1	2	3	2						10000	3	2625	2625	2											21097.5	3	5687	5687	1	42195	2	12701	12643.7	1	50	1	1	45	207.74	209.056
40	1	35	30.0526	1				2	3	1	2	1	3	5000	2	2575	2433.46	3																					42195	3	22139	22139	2	30	0	0	20
41	1	63	24.4898	1	1			1	2	0	2	2	2																					21097.5	3	6518	6518	2	42195	2	15172	15090.3	2	30	0	0	20
42	1	47	24.5511	1	1	1	1	2	3	0	2	3	2						10000	2	3103	3079.53	3											21097.5	3	6269	6269	1	42195	2	14416	14342.2	2	52	1	1	45	225.932	233.643
43	1	26	19.6235					1	2	1	1	1	1	5000	3	1240	1240	2	10000	3	2660	2660	2											21097.5	2	5867	5812.69	2						63	1	0	58
44	1	28	18.8664	1	1			1	1	1	2	3	1																					21097.5	3	5365	5365	2	42195	2	11707	11658.3	2	62	0	1	55	193.963
45	1	33	24.3018					2	5	0	2	3	2	5000	5	1341		2	10000	2	2826	2806.52	2											21097.5	3	6661	6661	2						28	1	1	20
46	1	37	24.3253					2	3	1	2	3	1	5000	3	2012	2012	2	10000	2	4042	4002.27	1																					10	0	0	6
47	1	38	24.3787					2	4	1	2	3	1						10000	2	3283	3256.74	3						16090	1	5460		3	21097.5	3	6856	6856	2						25	0	0	20
48	1	42	25.1031	1		1		2	5	0	2	2	1	5000	3	1338	1338	4	10000	4	2632	2687.22	2																42195	3	14813	14813	4	30	0	0	20
49	1	58	26.4294	1	1	1	1	3	7	0	1	3	1	5000	3	1330	1330	2																21097.5	3	6190	6190	2	42195	2	14071	14000.7	1	70	0	1	60	216.851	223.034
50	1	33	21.7576	1		1		2	3	1	2	3	2	5000	4	1323	1331.38	2	10000	4	2727	2786.32	2																42195	3	13337	13337	1	120	0	1	70	212.746	225.907
51	1	28	22.136					2	3	1	2	2	2											8045	4	2345	2455.96	3	16090	3	4982	4982	2											23	1	0	18
52	1	23	20.3423					2	3	0	2	1	1																16090	3	4800	4800	2	21097.5	4	6315	6505.5	3						25	0	1	18
53	1	36	25.2478					2	4	0	2	2	1	5000	3	1451	1451	3						8045	3	2583	2583	2																15	0	0	10
54	1	30	24.441					2	4	0	2	1	1						10000	3	2340	2340	2											21097.5	3	5040	5040	2						34	0	1	30
55	1	36	24.5511					2	3	0	2	2	1	5000	3	1316	1316	2						8045	3	2160	2160	2						21097.5	3	5975	5975	2						25	0	1	20
56	1	33	22.5183	1				2	3	0	1	3	1	5000	3	1000	1000	2																21097.5	1	4530		2	42195	3	9508	9508	2	135	1	1	100	160.549
57	1	42	26.2709					2	3	0	2	2	1																16090	3	5340	5340	2	21097.5	3	7274	7274	2						13	0	0	20
58	1	24	22.5394	1	1			2	3	1	2	2	1																					21097.5	4	6120	6298.75	1	42195	4	15420	15654.6	3	30	0	0	24
59	1	48	28.0584					1	1	0	2	2	2	5000	3	1632	1632	2																21097.5	4	7456	7723.02	2						24	1	1	20
60	1	30	26.6335					1	2	1	1	1	1	5000	3	1955	1955	2																21097.5	2	9435	9295.34	3						16	0	0	12
61	1	23	22.0195					3	8	0	2	2	1	5000	3	900	900	3																21097.5	4	4860	4972.05	3						60	1	0	50
62	1	27	23.3742					2	3	1	2	3	1	5000	4	1568	1579.78	3	10000	3	3475	3475	2											21097.5	2	8760	8639.48	2						17	0	0	15
63	1	38	25.2048					2	3	0	2	2	1	5000	4	1185	1191.72	1	10000	3	2497	2497	2																					16	1	1	35
64	1	59	27.2143					1	2	0	2	1	3						10000	3	3321	3321	2											21097.5	2	7105	7025.51	2						30	0	0	25
65	1	31	27.3801					1	1	1	1	1	1	5000	3	1943	1943	4											16090	3	6396	6396	2											12	0	0	10
66	1	47	22.4913	1	1			1	2	0	2	1	1																					21097.5	3	5690	5690	2	42195	4	12312	12461.1	1	40	1	0	25
67	1	26	25.2525	1	1	1	1	1	2	1	2	1	2	5000	2	1582	1527.42	2																21097.5	4	8218	8543.58	2	42195	2	16899	16797.6	1	34	1	1	30
68	1	52	23.8048	1	1	1	1	3	7	0	1	1	1	5000	4	1309	1317.2	2																21097.5	3	6149	6149	2	42195	4	13257	13430	2	40	1	1	32
69	1	33	28.2004	1	1	1	1	1	1	1	2	2	1						10000	3	4526	4526	4											21097.5	4	9900	10376.4	4	42195	3	18484	18484	2	15	0	0	30
70	1	24	25.6534					2	4	1	2	1	2	5000	4	1872	1888.82	2																21097.5	3	8886	8886	2						20	0	0	12
71	1	44	26.9886					1	2	1	2	2	1	5000	4	1892	1909.18	2																21097.5	2	9234	9100.18	2						23	0	1	18
72	1	50	19.1761	1				3	6	1	2	2	1																16090	4	3820	3947.27	1						42195	2	10718	10677.1	1	80	1	1	60
73	1	27	20.7741	1	1	1	1	2	4	1	2	2	1	5000	3	1142	1142	2																21097.5	3	5420	5420	1	42195	2	12095	12043	3	70	1	1	60
74	1	47	25.2475	1	1	1	1	2	4	0	3	1	1	5000	3	1050	1050	2																21097.5	4	4830	4940.66	2	42195	2	10757	10715.8	2	60	1	1	40
75	1	28	23.0056					2	4	0	2	1	1																16090	3	4674	4674	2	21097.5	3	6014	6014	1						30	1	1	25
76	1	31	18.3238					2	3	1	2	3	1						10000	3	3333	3333	2											21097.5	3	7115	7115	2						30	0	0	25
77	1	59	24.7866					2	5	0	2	3	1	5000	3	1477	1477	2																21097.5	2	7080	7001.06	2						26	1	1	24
78	1	30	24.099					1	1	1	2	3	2	5000	2	1448	1402.14	2											16090	2	4980	4826.04	2	21097.5	4	6677	6890.34	2						50	0	1	40
79	1	34	20.9132					1	1	1	2	2	1	5000	3	1277	1277	2																21097.5	4	6005	6177.01	1						30	1	1	25
80	1	41	22.9134					2	4	1	1	3	1	5000	4	1378	1387.09	1																21097.5	3	6411	6411	1						42	1	1	40
81	1	28	20.9132	1	1			1	1	1	1	1	1	5000	1	1163		1																21097.5	4	5155	5281.25	1	42195	2	10888	10845.8	1	86	1	1	80
82	1	37	27.4961	1	1			1	2	0	2	3	1																					21097.5	3	6420	6420	1	42195	2	14700	14623.2	1	42	0	1	30	238.094
83	1	31	22.5384	1	1	1	1	2	4	0	1	2	2	5000	4	1147	1153.29	2																21097.5	3	5473	5473	1	42195	3	12323	12323	2	45	1	1	35
84	1	35	23.2383					2	3	1	2	1	1	5000	3	1567	1567	2																21097.5	3	7443	7443	3						8	0	0	6
85	1	40	21.6221					2	3	1	2	2	1	5000	3	1380	1380	3	10000	2	3120	3096.28	4											21097.5	3	7020	7020	4						44	0	0	35
86	1	45	21.8716					1	2	1	2	2	1	5000	3	1708	1708	1	10000	3	3729	3729	1											21097.5	1	7930		1						30	1	1	25
87	1	32	22.8437					3	6	0	1	3	2	5000	3	1435	1435	2																21097.5	2	7015	6937.5	1						20	0	0	16
88	1	25	22.9134					2	3	0	2	1	1	5000	2	1380	1338.28	2																21097.5	3	8040	8040	4						8	0	1	15
89	1	31	24.5262	1				2	3	0	1	3	1						10000	3	2375	2375	2											21097.5	1	5201		2	42195	2	10778	10736.7	2	7	0	0	40	196.453
90	1	32	22.6817					1	1	1	1	1	1	5000	4	1620	1632.58	4																21097.5	3	7388	7388	1	42195	1	16975		1	51	1	0	42
91	1	25	24.9597	1	1	1	1	3	7	1	1	2	1	5000	4	1478	1488.46	3																21097.5	3	7200	7200	2	42195	3	14985	14985	2	45	1	0	35
92	1	32	21.5213					2	3	0	2	2	2						10000	2	2945	2923.85	3											21097.5	2	6191	6130.56	2						20	1	1	10
93	1	17	22.2635					2	4	0	1	3	1						10000	4	1813	1839.03	1											21097.5	3	4015	4015	1						90	1	1	70
94	1	33	21.7047					1	2	1	2	1	2						10000	3	3360	3360	2						16090	3	5520	5520	3											30	1	1	15
95	1	30	18.3238					1	2	1	2	3	1	5000	3	1680	1680	3																21097.5	2	7200	7118.38	2						10	0	1	15
96	1	28	19.9275	1		1		2	4	1	2	3	3	5000	4	1105	1110.84	1	10000	4	2365	2409.49	2																42195	2	12151	12098.5	2	55	0	0	35	200.793	206.062
97	1	56	20.5756					1	2	0	1	2	1	5000	4	1080	1085.58	2	10000	2	2261	2248.52	2						16090	4	3659	3775.61	2											60	0	1	55
98	1	30	24.2424					1	2	1	2	1	1	5000	3	1116	1116	2						8045	4	1825	1891.51	1																55	1	1	50
99	1	28	22.1946					2	4	1	2	2	2	5000	2	1401	1358.02	2	10000	4	2892	2958.8	2											21097.5	2	6692	6621.44	2						22	0	0	18
100	1	43	25.2478	1		1		2	4	0	2	2	1	5000	4	1490	1500.63	2	10000	4	3242	3326.18	2																42195	3	17400	17400	2	36	0	1	28
101	1	64	27.4583					1	1	0	2	1	2	5000	2	1590	1534.87	3	10000	3	3568	3568	3																					30	0	0	25
102	1	32	24.7372					2	3	1	2	3	1	5000	3	2100	2100	3																21097.5	3	7800	7800	3						20	0	0	12
103	1	26	19.8657	1	1			1	2	1	2	2	1	5000	5	1026		2																21097.5	3	4798	4798	1	42195	2	10461	10422.1	1	94	1	1	75
104	1	33	30.1847					2	5	1	2	2	2																16090	3	7862	7862	2	21097.5	2	11197.5	11001.3	3						30	0	0	20
105	1	25	22.9134					3	7	0	2	3	1	5000	3	1324	1324	2						8045	2	2285	2216.41	2	16090	1	5099		2											28	1	0	20
106	1	37	25.2319					3	6	0	2	2	2	5000	4	1305	1313.15	2	10000	3	2925	2925	2						16090	3	4625	4625	2											42	1	1	30
107	1	24	24.9351					3	7	0	2	2	1	5000	3	1080	1080	2																21097.5	2	5330	5285.14	2						30	1	1	35
108	1	29	22.6952					1	2	1	2	3	2											8045	2	2325	2254.02	4						21097.5	4	5790	5949.75	2						40	1	1	35
109	1	30	20.5756	1	1	1	1	1	1	1	2	2	1																16090	3	4279	4279	1	21097.5	3	5751	5751	2	42195	4	12719	12878.2	2	72	1	1	40
110	1	36	24.3414	1				3	8	0	2	3	1						10000	4	2420	2466.6	2						16090	1	4024		1						42195	3	13530	13530	2	51	1	1	35	205.019
111	1	34	25.2319					2	5	0	2	2	1	5000	3	1382	1382	2						8045	3	2475	2475	2																5	0	0	15
112	1	34	23.0824					3	8	1	1	3	1	5000	4	1315	1323.28	2																21097.5	4	6730	6946.8	1						40	1	1	30
113	1	34	27.5172	1		1		2	3	0	2	2	1	5000	4	1275	1282.78	2	10000	3	2946	2946	3																42195	3	14939	14939	2	43	0	1	32
114	1	40	28.4444	1	1	1	1	1	1	0	2	1	1	5000	4	1139	1145.2	2																21097.5	3	5370	5370	3	42195	4	11611	11743.5	2	82	1	1	65
115	1	38	23.3742	1	1	1	1	2	3	1	2	2	2						10000	3	3045	3045	2											21097.5	3	6610	6610	2	42195	3	13690	13690	2	35	0	0	20
116	1	38	25.3669					2	3	0	2	2	2	5000	4	1662	1675.24	3																21097.5	2	7556	7466.16	1						42	1	1	30
117	1	27	22.8437					1	2	1	2	1	1	5000	4	1457	1467.17	2											16090	3	5297	5297	2	21097.5	4	7142	7386.63	1						50	1	1	35
118	1	36	28.9425					2	3	1	2	1	1											8045	3	4200	4200	2						21097.5	2	10851	10666.7	2						15	0	0	10
119	1	33	22.7219					2	3	1	2	3	2						10000	4	3325	3413.61	3											21097.5	3	7060	7060	2						37	0	1	30
120	1	37	23.8496	1				2	3	0	2	3	1	5000	4	1213	1220.04	2																21097.5	1	5586		1	42195	3	12566	12566	1	42	1	1	38	210.759
121	1	29	20.6061					2	4	1	2	1	1						10000	2	2700	2682.22	2	8045	4	2100	2188.54	2																45	0	0	42
122	1	40	21.5213	1	1			3	8	0	2	2	1																					21097.5	3	4914	4914	2	42195	3	10698	10698	2	70	1	1	60
123	1	20	21.3859					2	5	0	2	3	1	5000	4	918	922.026	2						8045	3	1515	1515	1																80	0	1	75
124	1	27	24.858					2	5	1	1	2	3	5000	4	1434	1443.85	2						8045	3	2411	2411	3																17	1	1	17
125	1	45	27.2181					3	7	0	1	3	1	5000	3	1148	1148	1																21097.5	4	5496	5639.73	2						55	1	1	45
126	1	33	21.3522	1	1	1	1	2	3	0	2	1	1						10000	4	2820	2883.48	4											21097.5	2	5690	5638.9	1	42195	3	13040	13040	2	40	1	1	30
127	1	27	32.0715					2	3	0	2	2	1	5000	3	1574	1574	4	10000	2	3290	3263.63	3											21097.5	3	6470	6470	2						44	0	0	30
128	1	32	20.1037					2	3	1	2	2	2	5000	3	1530	1530	2																21097.5	4	6920	7149.42	2						30	1	1	26
129	1	54	21.7047	1	1			2	3	0	2	1	1																					21097.5	2	5804	5750.85	2	42195	4	12641	12798.2	2	52	0	0	50
130	1	33	26.6667					1	2	1	2	2	1	5000	3	1652	1652	2																21097.5	4	7740	8028.14	1						30	1	1	20
131	1	35	23.0056					3	8	0	2	2	1	5000	4	1049	1054.26	2	10000	2	2162	2150.58	2											21097.5	2	4865	4827.6	2						70	1	1	60
132	1	60	22.4467					3	6	0	2	1	2						10000	3	2541	2541	2											21097.5	4	5835	5997.27	2						30	1	1	25
133	1	41	21.3859					2	5	0	2	3	1	5000	3	1038	1038	2											16090	2	3912	3816.36	2											55	0	1	50
134	1	38	23.8048	1	1			1	2	0	1	3	1																					21097.5	4	5880	6044.82	1	42195	3	13860	13860	2	50	0	1	40	221.195
135	1	29	18.6314	1	1	1	1	2	3	1	2	3	1	5000	3	1210	1210	1																21097.5	2	6255	6193.31	2	42195	4	13632	13815	2	51	1	1	45	223.594	223.995
136	1	38	20.4533					3	8	1	1	1	1	5000	4	1337	1345.56	2																21097.5	2	6921	6845.55	1						25	1	1	25
137	1	31	24.3787	1		1		2	5	0	1	3	1	5000	4	1197	1203.85	2						8045	3	2210	2210	1											42195	3	15420	15420	1	34	1	0	20	235.862	235.271
138	1	36	21.9293					1	2	0	2	1	1	5000	2	1292	1255.36	1											16090	1	2875		2	21097.5	2	6090	6031.51	1						40	0	1	30
139	1	48	28.0584	1	1			2	3	0	2	2	1																					21097.5	4	6840	7064.06	1	42195	3	18300	18300	2	30	0	0	25
140	1	25	22.8676					2	3	0	2	3	1	5000	4	959	963.394	2	10000	3	1987	1987	2											21097.5	5	4485		3						60	1	1	50
141	1	34	20.6221					2	3	0	2	3	1	5000	4	1106	1111.85	2											16090	4	3911	4044.51	2											40	0	1	30
142	1	34	20.198	1		1		2	3	0	2	1	1	5000	4	1160	1166.44	2											16090	2	3921	3824.92	1						42195	3	11453	11453	2	70	1	1	60
143	1	44	25.9689					1	2	1	2	3	1	5000	3	1692	1692	3																21097.5	3	8344	8344	3						20	0	0	10
144	1	35	26.0309					2	4	0	2	1	2	5000	4	1707	1720.97	2																21097.5	3	7811	7811	2						11	0	0	10
145	1	65	24.5654					1	1	0	2	3	1						10000	2	3787	3752.11	2											21097.5	3	8526	8526	2						19	0	0	13
146	1	44	25.2048	1	1	1	1	1	2	0	2	2	1																16090	2	4620	4487.19	2	21097.5	4	6180	6362.33	3	42195	4	13458	13636.3	2	55	1	1	40
147	1	38	26.9788					1	2	0	2	2	2	5000	3	1395	1395	2																21097.5	3	6720	6720	2						14	1	0	30
148	1	29	26.6335					1	1	1	1	3	3	5000	4	1865	1881.69	1	10000	4	3720	3831.26	1																					22	0	1	15
149	1	64	24.8147	1	1			1	2	0	2	1	1																					21097.5	4	6748	6965.98	2	42195	3	14807	14807	2	60	1	1	45
150	1	55	25.1119	1	1	1	1	2	3	0	2	1	1	5000	4	1319	1327.33	2																21097.5	3	6272	6272	1	42195	3	14188	14188	1	50	1	1	40
151	1	30	23.7477					2	3	0	2	2	2	5000	4	954	958.348	1																21097.5	2	4542	4509.38	1						90	1	1	70
152	1	32	21.2331					2	3	1	2	1	1	5000	4	1383	1392.16	3	10000	2	3026	3003.68	3						16090	4	5013	5234.49	2											25	0	0	22
153	1	28	19.6603	1	1			2	3	0	2	1	2																					21097.5	3	4548	4548	2	42195	4	10080	10179.7	2	70	0	1	60
154	1	36	22.6079	1	1	1	1	2	3	0	1	2	1	5000	4	1031	1036.08	1																21097.5	3	4676	4676	1	42195	3	10040	10040	1	70	1	1	60
155	1	29	27.1974	1	1	1	1	2	4	1	2	1	2	5000	4	1660	1673.21	1																21097.5	2	8007	7906.19	2	42195	3	17341	17341	1	44	0	0	35
156	1	28	24.3414	1	1			2	3	0	2	3	2																					21097.5	4	6621	6830.72	2	42195	3	13840	13840	1	35	1	1	25	254.325
157	1	29	27.4961					2	3	0	2	2	1																16090	4	4512	4690.64	3	21097.5	3	6204	6204	4						30	0	0	25
158	1	36	22.8571	1				2	5	0	1	1	2						10000	4	2199	2237.41	1											21097.5	1	4831		1	42195	4	10652	10763.4	1	60	1	1	50
159	1	56	24.4898					2	3	0	2	1	1						10000	4	3096	3172.68	2						16090	2	4988	4833.55	2	21097.5	1	6992		2						34	0	1	25
160	1	31	24.5956					1	1	1	2	3	1	5000	2	1769	1701.03	2											16090	3	6600	6600	1	21097.5	2	8700	8581.11	1						20	0	0	15
161	1	39	23.3742	1	1			2	3	1	2	1	1																					21097.5	3	6130	6130	1	42195	3	13148	13148	2	40	1	1	40
162	1	35	20.9276					1	2	0	2	1	1																16090	4	3456	3559.84	2	21097.5	3	4667	4667	2						46	1	0	42
163	1	31	25.5288					2	3	0	1	2	1						10000	3	2880	2880	2						16090	3	4500	4500	2											25	0	0	20
164	1	27	20.202	1	1	1	1	2	3	1	2	2	2						10000	3	2700	2700	1											21097.5	3	6360	6360	1	42195	2	14100	14029.4	1	50	1	0	30
165	1	27	25.1119					3	8	0	1	2	1	5000	4	1300	1308.09	4											16090	2	5247	5076.37	3											20	0	0	5
166	1	28	24.3787					1	1	1	2	3	1						10000	2	4320	4274.65	4											21097.5	3	9900	9900	4						12	0	0	30
167	1	31	22.8059	1	1	1	1	2	3	1	1	2	2	5000	3	1440	1440	3																21097.5	2	6360	6296.23	2	42195	3	15060	15060	2	35	0	1	30
168	1	23	20.5857					1	2	0	2	2	1	5000	3	1250	1250	2	10000	2	2507	2491.66	2											21097.5	2	5769	5716.48	2						35	1	1	25
169	1	20	19.4767					2	3	0	2	2	1	5000	4	864	867.565	2	10000	3	1830	1830	2	8045	3	1428	1428	1																101	1	1	90
170	1	41	21.3333					1	2	0	2	3	2	5000	3	1180	1180	3																21097.5	4	6180	6362.33	3						15	1	1	40
171	1	34	23.8048	1	1	1	1	2	5	1	2	2	1						10000	3	3080	3080	3											21097.5	3	6756	6756	1	42195	2	16050	15958.5	2	35	1	1	30
172	1	60	23.8751	1	1	1	1	2	3	0	2	1	1						10000	4	2769	2830.18	2											21097.5	4	6150	6330.54	2	42195	3	13767	13767	1	42	0	1	38
173	1	51	26.1213					1	2	0	2	1	1						10000	3	2701	2701	2	8045	4	2207	2305.01	2						21097.5	3	6121	6121	2						29	0	0	25
174	1	40	31.3938					2	3	1	2	2	1																16090	2	7017	6715.14	1	21097.5	2	9522.5	9380.25	1						30	1	1	25
175	1	25	20.8117					2	3	1	2	1	1						10000	3	3294	3294	2											21097.5	4	7000	7234.84	2						20	0	0	17
176	1	24	23.0079					2	3	0	1	3	1						10000	3	2637	2637	2											21097.5	3	5708	5708	2						37	0	1	30
177	1	27	22.3776					2	3	1	2	2	1	5000	3	1462	1462	2																21097.5	3	7009	7009	2						28	0	1	22
178	1	36	24.5511					3	8	0	1	2	2	5000	4	1015	1019.92	2											16090	3	3660	3660	2											75	1	1	50
179	1	27	24.3819	1	1	1	1	2	3	0	2	2	2	5000	4	1327	1335.43	2																21097.5	3	6592	6592	3	42195	3	15120	15120	2	55	0	1	40
180	1	30	21.3859	1	1			1	1	0	2	3	1																					21097.5	2	4630	4596.11	2	42195	2	10211	10173.9	2	70	1	1	60	168.304
181	1	27	20.8996					1	2	1	2	1	1	5000	4	1498	1508.75	2	10000	3	2766	2766	1																					30	0	1	28
182	1	26	22.7949					2	5	0	2	2	1	5000	4	1143	1149.25	2																21097.5	3	5379	5379	2						46	1	1	40
183	1	33	21.2498					2	3	0	2	2	1						10000	3	2980	2980	1	8045	4	2266	2369.44	1	16090	3	4998	4998	1											17	0	1	15
184	1	17	23.0056					1	2	0	2	2	2	5000	4	1070	1075.47	1						8045	3	1800	1800	1																40	1	0	30
185	1	60	24.3787	1	1	1	1	3	8	0	2	1	1	5000	4	1121	1127.01	1																21097.5	4	5640	5791.47	1	42195	4	12480	12633.2	1	55	1	1	40
186	1	32	23.1481					3	6	0	1	3	1	5000	3	1020	1020	3						8045	2	1620	1585.22	2						21097.5	2	4680	4645.38	2						100	1	0	50
187	1	19	20.7792					2	3	0	2	3	1	5000	4	970	974.496	1	10000	2	2277	2264.34	2																					45	1	1	40
188	1	38	22.3725	1	1			2	3	1	2	1	2																					21097.5	2	5803	5749.86	2	42195	3	12420	12420	2	60	1	1	45
189	1	16	21.1535					3	8	0	2	1	1	5000	3	1122	1122	2						8045	3	2131	2131	2																55	1	1	50
190	1	35	28.2502	1	1			1	2	0	1	1	1																					21097.5	2	6009	5952.04	2	42195	4	13147	13317.1	2	52	0	1	40
191	1	24	21.7576					2	3	1	2	1	1	5000	4	1354	1362.78	2																21097.5	3	6848	6848	2						35	0	1	30
192	1	26	21.5213					1	1	0	2	1	1	5000	2	1053	1028.54	3						8045	2	1660	1623.5	2						21097.5	4	4470	4564.62	2						85	0	0	70
193	1	43	22.8059	1	1	1	1	2	3	0	2	1	1	5000	4	1054	1059.31	2																21097.5	4	5052	5173.19	2	42195	3	11107	11107	2	63	1	1	53
194	1	36	23.5245					3	7	0	1	3	1	5000	1	1600		3						8045	2	2401	2325.38	2						21097.5	2	5833	5779.32	1						30	1	0	20
195	1	33	25.1119	1	1			2	3	0	1	3	1																					21097.5	3	5307	5307	2	42195	4	11056	11176.1	1	58	1	1	40	197.357
196	1	33	26.2574					1	2	0	2	3	2	5000	4	1368	1376.96	2	10000	4	2839	2903.35	2											21097.5	3	6430	6430	2						25	0	1	20
197	1	49	22.1381	1		1		1	1	0	2	1	1	5000	2	1210	1177.81	1	10000	2	2600	2583.5	1																42195	2	14570	14494.6	2	60	1	1	46
198	1	49	25.954					2	3	0	2	2	1	5000	3	1447	1447	2											16090	3	5184	5184	2	21097.5	5	6571		2						35	1	1	27
199	1	25	22.3577	1				2	3	0	2	2	2																16090	3	3170	3170	1						42195	2	9301	9270.21	2	80	0	0	70
200	1	28	20.7792	1	1	1	1	2	3	1	2	3	1						10000	3	2343	2343	2											21097.5	3	5210	5210	2	42195	2	10691	10650.3	2	85	1	1	70	184.356	185.826
201	1	29	21.4389					3	8	1	1	3	2						10000	4	3240	3324.08	3											21097.5	4	7030	7266.89	2						25.5	1	1	25
202	1	39	21.7049	1	1	1	1	2	3	1	2	2	1	5000	4	1614	1626.49	2																21097.5	2	7768	7673.08	1	42195	4	15971	16222.8	1	38	0	1	30
203	1	30	26.9886					2	3	1	2	1	3	5000	3	1794	1794	2	10000	3	4448	4448	2						16090	3	7283	7283	3											11	0	0	10
204	1	36	23.2383					2	4	1	2	1	1	5000	3	1437	1437	2																21097.5	4	6876	7102.46	2						25	0	0	20
205	1	28	31.25					2	5	1	2	1	1	5000	3	1737	1737	2	10000	3	3364	3364	2											21097.5	2	8098	7994.9	1						20.1	0	0	16
206	1	37	27.0713					2	3	0	3	3	1	5000	4	1189	1195.76	1						8045	4	2078	2164.66	3						21097.5	3	5729	5729	1						20	1	0	20
207	1	34	26.681					2	3	1	2	1	1	5000	3	2040	2040	3	10000	3	3364	3364	1											21097.5	4	8540	8892.14	2						13	0	1	20
208	1	23	22.8059	1		1		2	3	0	2	2	1	5000	4	949	953.303	1						8045	3	1600	1600	1											42195	3	10353	10353	2	70	0	1	60
209	1	47	24.4898	1				2	4	0	2	1	1	5000	3	1203	1203	1																					42195	3	12111	12111	1	55	1	0	47
210	1	32	29.342	1	1			1	1	0	2	1	1																					21097.5	2	6420	6355.03	2	42195	4	12600	12756.2	2	38	1	0	30
211	1	31	23.3024	1	1			1	1	1	2	3	3																					21097.5	2	5523	5474.85	2	42195	3	12123	12123	2	50	1	0	38	203.602
212	1	29	23.906					2	3	0	2	2	1	5000	3	1647	1647	2																21097.5	4	7347	7606.13	2						22	0	0	16
213	1	34	29.3292					1	1	1	2	2	2						10000	3	4687	4687	2											21097.5	2	10175	10012.8	2						20	0	0	15
214	1	43	25.2341	1	1			1	2	0	2	2	1																					21097.5	3	6480	6480	2	42195	2	13800	13732.3	1	52	1	1	40
215	1	28	24.2376					2	3	0	2	1	2	5000	3	1523	1523	3																21097.5	2	6900	6825.01	2						30	0	0	25
216	1	38	20.419	1	1	1	1	2	5	1	2	3	2											8045	2	2135	2075	2						21097.5	3	5868	5868	2	42195	2	13120	13058.8	1	62	1	1	55	209.368	212.112
217	1	36	22.9134	1	1	1	1	2	4	0	2	2	2	5000	3	1033	1033	1																21097.5	2	5148	5106.14	3	42195	2	12423	12368.1	3	55	0	0	30
218	1	30	23.2383					2	3	1	2	1	1	5000	4	1592	1604.15	2																21097.5	2	7712	7618.44	1						22	0	0	18
219	1	29	21.8359					1	1	0	1	3	1						10000	3	2375	2375	2	8045	1	1845		1						21097.5	4	5250	5381	2						25	1	0	20
220	1	43	19.6409	1				1	2	0	2	3	1	5000	2	1346	1306.28	1																21097.5	1	6325		1	42195	2	11622	11574	1	57	0	0	40	222.83
221	1	34	23.8961					2	3	0	2	1	2											8045	3	2378	2378	2	16090	3	5144	5144	2											25	0	1	25
222	1	20	22.2178					3	7	0	1	1	1	5000	4	1065	1070.42	1	10000	3	2316	2316	2											21097.5	2	5400	5353.96	2						35	1	1	30
223	1	33	20.8117					2	3	1	2	2	2	5000	4	1045	1050.22	2	10000	2	2219	2206.97	2											21097.5	3	5120	5120	3						50	0	0	40
224	1	27	22.2055					1	1	1	1	2	1	5000	2	1492	1443.36	1																21097.5	4	6764	6983.03	1						16	1	1	12
225	1	35	25.1651	1		1		1	1	1	3	2	1	5000	3	1463	1463	1	10000	3	3122	3122	1																42195	4	14453	14658.9	1	35	1	0	25
226	1	33	30.1847					3	7	1	2	1	2	5000	3	1809	1809	4	10000	3	3810	3810	3											21097.5	2	8650	8532.47	3						25	0	0	20
227	1	27	20.369					2	3	1	2	1	2						10000	3	3300	3300	2						16090	4	6240	6586.93	2											3	1	1	20
228	1	31	24.9351					2	3	0	2	2	1											8045	3	2700	2700	3	16090	3	5700	5700	3											20	0	0	10
229	1	27	28.1329					2	5	0	2	2	1	5000	4	1382	1391.14	1																21097.5	3	7023	7023	2						32	1	1	25
230	1	51	34.3458	1	1			1	1	0	2	2	1																					21097.5	3	8160	8160	2	42195	3	18960	18960	2	45	0	1	35
231	1	32	23.4541					2	3	1	2	3	1	5000	4	1650	1663.05	2																21097.5	4	7794	8086.25	2						44	1	1	35
232	1	28	23.4736	1	1	1	1	2	5	0	2	1	1	5000	3	1050	1050	2																21097.5	3	4950	4950	2	42195	2	11010	10966.9	3	72	1	1	62
233	1	39	22.8435	1				2	4	0	2	1	1						10000	4	2290	2331.68	1																42195	2	11148	11103.8	1	40	1	1	35
234	1	30	24.441					2	4	0	2	2	1						10000	4	2428	2474.91	3						16090	2	3757	3668.7	1	21097.5	3	5326	5326	2						15	0	0	30
235	1	32	24.7866					2	3	0	2	2	1	5000	5	1560		2	10000	2	4076	4035.6	3											21097.5	3	8919	8919	2						12	0	0	14
236	1	30	18.9394					2	4	0	1	3	1	5000	4	1085	1090.63	3											16090	3	3825	3825	3	21097.5	3	4920	4920	2						50	0	1	35
237	1	32	28.1329					1	1	0	2	2	1	5000	3	1296	1296	2																21097.5	3	6936	6936	2						22	1	1	15
238	1	31	20.369	1	1	1	1	2	4	1	1	2	1	5000	4	1468	1478.32	3																21097.5	3	6765	6765	2	42195	3	15009	15009	2	41	0	0	36
239	1	54	21.29	1	1	1	1	1	2	0	2	1	2	5000	3	1041	1041	1																21097.5	3	4738	4738	1	42195	2	10081	10044.8	1	100	1	0	90
240	1	45	26.4193					3	7	0	2	3	1	5000	2	1740	1674.2	2											16090	3	6900	6900	2											25	0	0	20
241	1	42	19.9748					1	2	1	2	3	1											8045	3	2252	2252	2	16090	3	4875	4875	2											50	0	0	40
242	1	46	23.6403					3	7	0	2	2	1	5000	4	1174	1180.59	1																21097.5	2	5700	5648.73	2						55	1	1	45
243	1	26	23.0403					2	5	1	2	1	1	5000	3	1335	1335	3	10000	3	2642	2642	1											21097.5	4	6137	6316.76	1						40	0	1	35
244	1	26	30.0526	1	1			1	2	1	2	1	1																					21097.5	3	6984	6984	1	42195	2	15743	15655	1	32	1	0	25
245	1	38	21.6914	1	1	1	1	2	3	0	2	2	2	5000	4	995	999.731	2																21097.5	2	4641	4606.95	2	42195	2	9627	9594.02	2	105	1	1	90
246	1	34	25.0438	1	1			2	3	0	2	3	1																					21097.5	3	6960	6960	4	42195	4	10780	10894.1	1	50	0	1	35	252.604
247	1	35	24.099					1	2	1	2	1	2	5000	4	1870	1886.78	2																21097.5	2	7870	7772.59	1						15	0	0	10
248	1	18	20.3166					1	1	0	1	2	1	5000	3	978	978	1	10000	2	2282	2269.28	3											21097.5	3	6612	6612	4						8	0	0	0
249	1	31	20.5572	1	1	1	1	1	1	1	2	1	2						10000	3	2550	2550	2											21097.5	4	5536	5681.86	2	42195	2	12493	12437.5	2	35	0	0	30
250	1	50	22.6079	1	1	1	1	2	3	0	1	3	1						10000	4	2472	2520.64	1											21097.5	3	5782	5782	2	42195	4	12052	12194.8	1	68	1	1	60	204.829	206.828
251	1	20	19.295					2	3	0	2	1	1	5000	3	898	898	1	10000	2	1884	1875.32	1	8045	2	1548	1516.21	2																98	1	1	90
252	1	45	22.6263	1	1			1	1	0	2	3	1																16090	1	3810		1	21097.5	4	4830	4940.66	1	42195	2	10593	10553.1	1	65	1	1	45	183.676
253	1	36	22.3341	1		1		2	4	0	2	3	1	5000	4	897	900.843	1											16090	3	3105	3105	1						42195	4	8777	8852.5	1	86	1	1	70	151.762	149.506
254	1	31	25.8981					1	1	0	2	1	1	5000	3	1500	1500	2																21097.5	3	7620	7620	2						12	0	0	25
255	1	35	22.2635					1	2	1	2	1	1	5000	4	2134	2155.88	3	10000	3	4043	4043	2																					13	0	0	10
256	1	32	20.7441					3	6	0	2	2	1						10000	2	3003	2981.02	2	8045	3	2472	2472	4																33	1	1	25
257	1	37	21.9138					4	9	0	2	2	3	5000	3	1256	1256	3						8045	2	2229	2163.68	3																25	1	1	20
258	1	27	23.2007	1				3	8	0	1	2	1	5000	4	1260	1267.6	2																					42195	3	12960	12960	2	60	0	1	50
259	1	39	23.4918	1	1			2	4	1	2	3	2																					21097.5	3	7037	7037	2	42195	2	17660	17549.3	2	55	0	1	40	252.073
260	1	42	24.858					3	7	0	2	1	1	5000	1	1234		3	10000	3	2328	2328	2	8045	3	1947	1947	3																35	1	1	30
261	1	34	22.2635	1	1	1	1	1	2	0	2	1	1	5000	3	1045	1045	2																21097.5	3	4690	4690	1	42195	3	10425	10425	1	60	0	1	40
262	1	30	21.3859					2	3	1	1	1	1						10000	3	3153	3153	2											21097.5	4	6936	7166.5	2						55	1	0	40
263	1	47	25.6631	1	1	1	1	2	4	0	1	3	1	5000	3	1198	1198	1																21097.5	3	5606	5606	1	42195	3	11898	11898	1	38	1	1	28	211.921	208.28
264	1	24	21.5213					2	3	0	2	2	2											8045	3	1610	1610	1	16090	4	3602	3714.95	2						42195	1	10528		2	85	1	1	65
265	1	26	19.1064					3	7	0	2	2	2	5000	3	869	869	2						8045	3	1456	1456	2																95	1	1	70
266	1	32	21.0761					2	5	0	1	1	1	5000	4	1095	1100.73	2											16090	3	3822	3822	2	21097.5	3	5370	5370	2						30	1	1	25
267	1	44	27.9035					2	3	0	2	1	1	5000	2	1287	1250.64	2	10000	2	2537	2521.29	2											21097.5	2	6250	6188.41	2						44	1	1	30
268	1	44	19.6235	1	1			1	1	1	2	3	1																					21097.5	4	4569	4667.9	1	42195	2	9838	9803.56	2	22	1	1	85	164.189
269	1	27	31.339					3	7	1	2	3	1						10000	3	4115	4115	2						16090	3	6534	6534	2											17	1	0	10
270	1	35	22.9134	1	1	1	1	2	5	0	1	1	1											8045	4	1617	1668.99	2						21097.5	2	4560	4527.13	3	42195	2	10137	10100.4	2	65	1	1	58
271	1	29	25.7943					1	2	1	2	1	1	5000	4	1670	1683.37	1																21097.5	4	9496	9933.41	3						12	0	0	6
272	1	28	26.6902					2	4	0	1	3	3	5000	2	1275	1239.31	3											16090	3	4531	4531	2											24	0	1	20
273	1	38	26.5089					1	2	0	2	2	1						10000	3	2760	2760	3											21097.5	3	6090	6090	2						20	1	0	15
274	1	36	22.9763	1	1			1	1	0	2	3	1																					21097.5	3	7957	7957	2	42195	3	15508	15508	2	38	0	0	35	283.179
275	1	53	23.0056	1				2	3	0	1	3	1						10000	2	2475	2460.05	2																42195	4	12255	12402.7	2	50	1	1	35	204.535
276	1	27	28.0584					2	4	0	2	1	1	5000	3	1623	1623	2	10000	2	3662	3629.36	2											21097.5	2	9012	8884.5	2						20	0	0	18
277	1	39	31.8451					2	3	1	2	1	1	5000	4	1799	1814.53	2	10000	2	4424	4376.45	3																					13	0	0	13
278	1	53	25.8981					3	6	0	2	2	2	5000	4	1345	1353.66	2						8045	4	2366	2479	3						21097.5	3	6425	6425	2						25	0	0	20
279	1	37	20.3423	1	1	1	1	1	1	0	1	3	1						10000	3	2321	2321	2											21097.5	4	5241	5371.55	2	42195	4	11352	11478.6	1	50	0	1	45	197.672	194.601
280	1	32	24.858	1	1	1	1	2	4	1	2	1	1	5000	4	1361	1369.87	2																21097.5	2	6692	6621.44	2	42195	4	14400	14604.3	2	40	0	0	25
281	1	37	23.4604	1	1	1	1	1	1	1	2	2	3	5000	4	1589	1601.1	1																21097.5	3	7380	7380	1	42195	4	17160	17451	1	40	1	0	35
282	1	36	21.0616					1	2	1	2	1	3	5000	2	1498	1448.97	1																21097.5	4	6679	6892.47	1						37	1	0	31
283	1	38	21.1841	1				2	4	0	2	2	2	5000	3	1210	1210	2																					42195	2	12005	11953.8	1	52	1	1	45
284	1	26	22.1497					2	3	1	2	2	1	5000	3	1980	1980	2																21097.5	4	6536	6740.29	2						21	0	0	16
285	1	24	21.0616	1	1			2	3	1	2	1	3																					21097.5	2	6493	6426.55	2	42195	2	13530	13465	2	60	1	1	40
286	1	42	25.6534					2	4	1	2	1	1	5000	4	2292	2317.26	2	10000	2	4440	4392.11	2	8045	3	4440	4440	3																22	1	0	20
287	1	33	22.4467					2	3	0	2	1	1	5000	3	1327	1327	2																21097.5	3	6540	6540	2						25	0	0	20
288	1	34	24.3018	1		1		2	4	0	2	1	2	5000	4	1285	1292.9	3	10000	2	2473	2458.07	1																42195	3	12507	12507	1	40	0	0	35
289	1	35	24.858	1	1	1	1	2	3	1	2	1	3	5000	4	1585	1597.04	2																21097.5	2	6963	6886.64	2	42195	2	15527	15441.4	2	40	1	1	30
290	1	25	23.0824	1	1	1	1	2	4	1	2	2	1	5000	2	1130	1101.87	2																21097.5	4	5229	5358.94	1	42195	2	12048	11996.4	2	60	0	1	50
291	1	36	27.2949					1	2	0	1	3	1	5000	2	1620	1562.81	2	10000	4	3360	3450.51	2																					8	1	0	25
292	1	36	24.4716					2	3	0	2	1	1	5000	3	1386	1386	2																21097.5	3	6538	6538	1						25	1	0	20
293	1	38	19.7888					2	3	0	1	2	1											8045	4	1560	1608.34	2						21097.5	2	4413	4382.2	3						50	1	1	40
294	1	50	26.5807					2	5	0	1	1	1											8045	3	2684	2684	2						21097.5	3	6804	6804	2						30	0	0	25
295	1	34	20.7029					1	1	1	2	2	1	5000	3	1213	1213	1																21097.5	3	5525	5525	1						58	1	1	50
296	1	26	20.0537					2	3	1	2	2	2	5000	3	1680	1680	2											16090	3	6600	6600	2											21	1	0	15
297	1	23	21.3333					2	5	0	2	1	1	5000	1	912		2	10000	2	1797	1789.1	2	8045	3	1454	1454	2																50	0	1	45
298	1	33	25.3918					3	6	0	1	2	1	5000	4	1338	1346.57	2	10000	4	2833	2897.07	2																					15	0	1	12
299	1	29	23.2383					2	3	1	1	2	1																16090	3	6912	6912	3	21097.5	2	9005	8877.69	3						12	0	0	15
300	1	31	23.8048					2	5	1	2	1	1	5000	3	2400	2400	3																21097.5	3	8400	8400	3						30	0	0	20
301	1	30	21.6992	1		1		1	2	1	2	2	2	5000	4	1067	1072.44	1	10000	4	2169	2206.36	1																42195	3	10334	10334	2	85	1	1	70
302	1	37	28.4972	1				2	3	0	2	1	1	5000	4	1372	1381.01	2																					42195	4	16474	16742	1	50	0	0	35
303	1	26	22.1946	1	1	1	1	2	4	1	2	1	2	5000	2	1813	1741.67	3																21097.5	3	9009	9009	4	42195	3	20355	20355	2	35	1	0	10
304	1	24	20.8117					2	3	1	2	2	1						10000	2	3394	3365.95	2						16090	4	5544	5816.17	2	21097.5	3	7511	7511	1						25	0	0	15
305	1	25	21.8716					3	6	1	2	2	1	5000	4	1525	1536.14	2	10000	4	3356	3446.29	2											21097.5	3	7646	7646	2						28	0	0	15
306	1	43	27.5421					1	2	0	2	1	1						10000	3	2988	2988	2						16090	3	5040	5040	2	21097.5	4	6480	6680.75	2						50	0	0	30
307	1	29	21.8716					2	3	1	2	3	1																16090	3	5700	5700	2	21097.5	2	6900	6825.01	2						20	1	1	15
308	1	47	24.6914					2	3	0	2	1	2						10000	3	2932	2932	2						16090	2	4863	4716.08	2											36	1	1	28
309	1	33	21.2331	1				1	2	0	3	2	1	5000	4	1125	1131.05	1																					42195	2	11440	11393.5	1	65	1	1	60
310	1	32	23.0056					2	3	1	2	3	1	5000	4	1828	1844.03	2						8045	2	3069	2946.53	2																20	0	0	20
311	1	33	21.0616					2	4	0	1	1	1	5000	3	1167	1167	2	10000	3	2539	2539	2											21097.5	2	5601	5551.48	2						22	1	1	18
312	1	27	24.9597					1	1	1	2	2	2	5000	3	1530	1530	2						8045	4	2557	2689.49	3																15	0	0	15
313	1	37	21.6914	1		1		2	3	0	2	3	1	5000	4	982	986.608	1	10000	4	2043	2076.11	1																42195	3	9290	9290	1	108	1	1	95	160.254	159.564
314	1	30	27.5244					2	3	0	2	1	1						10000	3	3658	3658	1											21097.5	2	8882	8758.12	1						32	0	0	31
315	1	26	19.4415	1	1	1	1	2	5	1	2	3	1						10000	3	3047	3047	2											21097.5	4	6778	6997.95	2	42195	2	16226	16132.5	2	30	0	0	20	262.933	260.233
316	1	40	24.099					1	2	0	1	3	2																16090	4	5262	5506.57	4	21097.5	3	6711	6711	2						25	0	0	20
317	1	29	22.7036					3	6	1	2	3	1	5000	4	1749	1763.67	1	10000	3	3056	3056	1																					5	0	0	2
318	1	37	23.0056	1	1	1	1	1	1	1	2	1	2	5000	3	1540	1540	2																21097.5	3	7037	7037	2	42195	2	16636	16537.8	2	60	1	1	45
319	1	19	21.5213					2	4	0	2	1	1	5000	3	1065	1065	2						8045	2	1735	1695.17	2																60	1	0	40
320	1	24	20.9194					2	4	0	2	3	1						10000	3	2656	2656	3						16090	4	4380	4548.15	2	21097.5	3	5904	5904	2						25	0	0	15
321	1	26	23.9702					1	1	1	2	3	1																16090	2	8340	7917.01	2	21097.5	2	10260	10095.1	2						14	0	0	8
322	1	24	24.3018	1	1			1	2	1	2	1	1																					21097.5	3	6950	6950	1	42195	3	16660	16660	1	34	1	0	28
323	1	23	20.419	1	1	1	1	2	3	1	2	3	1						10000	2	3414	3385.62	3											21097.5	2	8100	7996.85	2	42195	3	17153	17153	2	35	0	0	20	295.906	295.542
324	1	39	26.7161					1	2	0	2	3	2	5000	4	1064	1069.41	2											16090	3	3750	3750	2											45	1	1	40
325	1	44	21.6891	1				1	2	1	2	1	1						10000	3	3287	3287	1																42195	3	15060	15060	1	55	1	0	40
326	1	32	19.9214	1	1	1	1	2	5	0	2	2	2						10000	2	2290	2277.19	3											21097.5	2	5000	4960.5	2	42195	3	10080	10080	2	67	1	1	55
327	1	30	25.922					2	5	1	2	1	1	5000	4	1648	1661.02	3	10000	4	3484	3581.41	3																					7	0	0	20
328	1	41	21.3859	1				1	1	0	2	3	3																16090	2	5880	5666.55	2						42195	3	15617	15617	2	48	0	0	40	268.199
329	1	55	26.6335					1	2	1	2	2	2	5000	1	2426		2	10000	3	4445	4445	2											21097.5	3	9694	9694	2						21	0	0	15
330	1	32	26.2031	1	1	1	1	2	3	1	2	1	2						10000	4	3092	3168.48	2											21097.5	3	6790	6790	2	42195	3	14313	14313	2	33.6	1	1	27
331	1	27	23.2419					2	3	0	2	3	1	5000	3	1444	1444	2	10000	3	3100	3100	2																					20	0	0	15
332	1	27	25.6534					3	7	1	2	2	1	5000	3	1740	1740	3	10000	2	3660	3627.4	4																					10	0	0	3
333	1	61	23.7477	1				3	6	0	2	1	1	5000	3	1253	1253	2																					42195	3	12900	12900	1	68	1	1	55
334	1	74	21.6407					1	1	0	2	2	2	5000	3	1980	1980	2	10000	2	4200	4157.12	3																					5	0	0	12
335	1	26	23.7477					2	4	0	1	1	1	5000	4	1470	1480.35	2	10000	2	3144	3119.91	2																					17	1	0	15
336	1	50	24.3787					2	5	0	2	3	1	5000	2	1610	1553.5	3											16090	2	5636	5439.6	2	21097.5	1	8036		1						24	0	1	20
337	1	32	21.3859					2	4	0	2	2	1						10000	3	3272	3272	2											21097.5	3	6858	6858	2						23	1	0	20
338	1	43	23.5923					2	4	1	2	3	1	5000	3	1680	1680	2	10000	3	3420	3420	2											21097.5	2	7800	7704.3	2						32	1	0	30
339	1	42	22.5064	1	1	1	1	2	4	0	1	2	1						10000	3	2388	2388	2											21097.5	2	5330	5285.14	2	42195	2	11248	11203	2	89	0	1	77
340	1	27	23.6772	1				2	4	1	2	3	2	5000	4	1295	1303.03	2																					42195	2	13143	13081.6	1	52	1	1	45	220.112
341	1	22	25.2319	1	1	1	1	2	5	0	1	1	1	5000	3	1155	1155	2																21097.5	3	5435	5435	2	42195	3	12132	12132	2	50	1	1	40
342	1	28	19.4415	1	1			2	3	1	2	1	2																					21097.5	3	6060	6060	3	42195	4	12960	13125.3	2	43	1	0	30
343	1	34	28.2004					1	1	0	2	3	1	5000	3	1580	1580	2																21097.5	2	8052	7950.06	1						25	0	0	20
344	1	17	23.6772					2	3	0	2	3	3	5000	3	1084	1084	2	10000	2	2651	2633.85	3																					35	1	1	30
345	1	28	22.3621					2	4	0	2	2	1	5000	3	1388	1388	2											16090	3	5726	5726	3											8	0	1	16
346	1	26	29.6846	1	1	1	1	2	3	0	2	2	1	5000	3	1367	1367	1																21097.5	4	6621	6830.72	1	42195	2	17137	17032.8	1	40	1	0	20
347	1	20	25.1122					2	3	0	2	2	3	5000	4	1370	1378.99	2																21097.5	2	7247	7164.32	2						17	0	0	10
348	1	27	19.9214					2	3	1	1	1	1	5000	3	1634	1634	2																21097.5	2	9600	9455.45	4						20	0	0	20
349	1	25	22.1497	1				1	2	0	2	3	1	5000	4	947	951.285	1																21097.5	5	4166		1	42195	4	9152	9234.12	1	110	1	1	103	153.455
350	1	29	25.922					3	6	0	2	1	1	5000	3	1725	1725	2	10000	4	3750	3863.09	2																					15	0	0	15
351	1	17	22.5394					2	4	0	2	1	1	5000	4	988	992.665	2						8045	3	1678	1678	2																42	1	1	37
352	1	47	25.2341	1				2	3	0	2	2	1	5000	3	1159	1159	2																					42195	3	11620	11620	2	62	1	1	45
353	1	50	20.2415	1	1	1	1	1	2	1	2	1	2																16090	4	4379	4547.07	2	21097.5	2	5755	5702.74	1	42195	4	12211	12357.6	1	69	0	1	62
354	1	34	21.2498	1				3	6	0	1	2	1	5000	4	1044	1049.21	2											16090	1	3767		1						42195	2	11047	11003.6	2	75	1	1	70
355	1	38	21.2331					2	4	1	2	2	1	5000	4	1530	1541.22	2						8045	3	2640	2640	2																20	0	0	15
356	1	29	23.6772	1	1	1	1	2	3	0	1	2	2	5000	3	1081	1081	2																21097.5	2	5118	5076.62	2	42195	3	11295	11295	2	55	1	0	45
357	1	25	24.209	1				3	6	1	1	3	1	5000	3	1308	1308	2																					42195	2	13620	13554.1	2	50	1	1	40	223.084
358	1	49	19.5736	1				1	1	1	2	3	2											8045	3	2175	2175	3											42195	2	14304	14231.3	3	25	0	1	25	230.04
359	1	50	22.1497					1	2	0	1	3	1	5000	3	1250	1250	2	10000	3	2591	2591	2																					27	1	1	24
360	1	32	22.0258	1				1	2	0	2	1	1	5000	1	1200		2	10000	4	2287	2328.57	1																42195	4	11070	11190.4	1	51	1	1	42
361	1	33	25.8786	1				2	3	1	2	3	3																16090	4	6300	6653.82	2						42195	4	21300	21750.2	4	20	0	1	25	319.864
362	1	23	22.0195					2	3	0	2	3	2						10000	3	2274	2274	2											21097.5	2	5155	5113.03	2						43	1	1	36
363	1	24	21.5213					3	7	0	2	1	3	5000	4	1011	1015.88	1	10000	4	2143	2179.46	2	8045	4	1754	1815.34	2																60	1	1	45
364	1	35	21.3859	1	1	1	1	2	5	1	2	1	1	5000	4	1303	1311.13	2																21097.5	3	6223	6223	2	42195	4	14340	14542.6	1	30	0	0	30
365	1	39	26.681					1	1	1	2	3	1	5000	4	2127	2148.74	1	10000	3	4500	4500	1																					13	0	1	12
366	1	32	29.5757					2	4	0	2	3	1	5000	3	1815	1815	4	10000	2	3277	3250.84	2																					30	1	1	20
367	1	43	24.441					1	2	0	2	3	1																16090	4	6600	6989.36	3	21097.5	3	7380	7380	3						50	0	0	40
368	1	38	22.6506	1	1	1	1	2	3	0	2	2	1											8045	3	1978	1978	1						21097.5	2	5577	5527.91	1	42195	2	12485	12429.6	1	67	1	1	60
369	1	28	18.7553					2	3	0	2	1	3	5000	3	1200	1200	3																21097.5	4	5467	5609.2	2	42195	1	12378		2	45	1	0	30
370	1	43	21.4389					3	8	1	2	2	1	5000	2	1385	1342.98	3	10000	3	2782	2782	2											21097.5	4	6280	6468.37	2						41	1	1	37
371	1	32	21.2331	1				2	3	0	2	3	2	5000	3	1080	1080	2																					42195	2	12720	12662.5	2	35	0	1	15	197.03
372	1	28	20.7507					2	3	1	2	3	3	5000	2	1685	1623.22	2																21097.5	2	7661	7568.66	3						7	0	0	6
373	1	22	23.8496					3	6	0	2	2	1	5000	3	1032	1032	1	10000	3	2220	2220	2											21097.5	4	5037	5157.46	2						75	1	1	65
374	1	45	20.9185					2	4	1	2	2	1						10000	3	3014	3014	1											21097.5	3	7201	7201	2	42195	1	16578		1	38	0	1	27
375	1	31	21.2498					2	3	0	1	3	1	5000	2	1470	1422.76	2	10000	3	3090	3090	2																					20	0	1	15
376	1	42	23.6101	1	1	1	1	2	3	0	2	2	2	5000	4	1140	1146.21	2																21097.5	4	5475	5617.62	2	42195	3	12660	12660	2	61	0	1	40
378	1	44	24.4898	1	1	1	1	1	1	0	2	1	2											8045	3	2020	2020	2						21097.5	3	5647	5647	2	42195	3	12531	12531	2	50	1	1	37
379	1	33	27.1515	1	1	1	1	1	2	0	1	3	1	5000	3	1570	1570	2																21097.5	3	7610	7610	2	42195	4	19825	20214.4	3	48	0	0	30	276.112	281.046
380	1	20	20.3823					2	4	1	1	1	2	5000	2	1460	1413.39	2											16090	4	5580	5855.8	2	21097.5	3	7200	7200	2						13	0	1	35
381	1	47	23.9778	1	1			2	5	0	2	2	2																					21097.5	4	5210	5338.99	1	42195	3	11678	11678	1	80	1	1	57
382	1	32	24.4314					2	4	1	2	1	2	5000	3	1676	1676	2											16090	3	5718	5718	1	21097.5	2	7644	7552.07	1						29	0	1	25
383	1	36	27.9962					1	2	1	2	3	2	5000	3	2016	2016	1																21097.5	3	10369	10369	2						12	1	0	25
384	1	27	23.2383					2	3	1	2	1	1																16090	3	6113	6113	2	21097.5	3	7680	7680	2						20	0	0	12
385	1	46	31.7002	1	1			2	5	0	2	3	1																					21097.5	2	9900	9746.34	2	42195	4	23100	23630.4	2	18	0	0	10	362.955
386	1	36	27.5417	1				2	4	1	2	2	3						10000	4	3720	3831.26	3																42195	4	20520	20937.5	3	40	0	0	30
387	1	62	27.3631					2	4	1	3	1	1	5000	4	1956	1974.37	2	10000	3	4014	4014	2																					21	0	0	19
388	1	25	20.5857	1		1		2	3	0	2	2	1	5000	3	1027	1027	2	10000	4	2141	2177.39	2																42195	4	10176	10277.6	2	75	1	1	65
389	1	34	20.7029					2	3	1	2	2	2						10000	4	3577	3679.76	2						16090	3	6158	6158	2	21097.5	4	7936	8239.21	2						20	0	0	18
390	1	35	30.297					2	3	0	2	3	1	5000	3	1320	1320	1	10000	3	6420	6420	2																					5	0	0	14
391	1	24	23.9778	1	1	1	1	1	2	0	2	2	1						10000	4	1908	1936.85	1											21097.5	2	4314	4284.57	2	42195	4	9214	9297.24	1	107	1	1	85
392	1	30	23.8496					3	6	0	1	2	2	5000	4	1290	1297.96	2																21097.5	3	7016	7016	2						28	0	1	15
393	1	40	23.0403	1		1		1	1	0	2	1	2	5000	3	1332	1332	3	10000	3	2701	2701	2																42195	4	14160	14357.5	2	40	0	0	25
394	1	39	21.3448	1	1	1	1	1	2	1	2	2	2	5000	3	1578	1578	2																21097.5	3	7095	7095	2	42195	2	17640	17529.6	1	37	0	0	30
395	1	34	24.5956	1	1	1	1	1	1	1	2	3	1						10000	3	3660	3660	2											21097.5	3	9600	9600	3	42195	4	17100	17388.9	2	30	0	0	12	355.8	349.391
396	1	32	26.4017					1	1	0	2	3	1	5000	2	1193	1161.69	2											16090	2	4485	4359.74	2											50	0	0	40
397	1	31	24.5511					2	4	0	2	3	1	5000	2	1150	1120.88	2																21097.5	3	5410	5410	2						50	0	1	30
398	1	34	28.7598					2	4	0	2	1	1	5000	3	1500	1500	2						8045	2	3000	2882.87	4						21097.5	3	7260	7260	2						16	1	0	10
399	1	36	20.4467					2	4	1	2	1	1	5000	4	1317	1325.3	1											16090	3	4560	4560	2											51	0	1	42
400	1	34	23.9778	1	1	1	1	2	3	1	2	3	1	5000	3	1647	1647	3																21097.5	2	6916	6840.66	1	42195	3	15958	15958	2	45	0	0	37	247.737	255.391
401	1	33	21.7452	1		1		3	7	0	1	3	1						10000	4	2480	2528.96	3						16090	4	4200	4354.37	3						42195	4	11673	11806.9	2	52	0	1	45	211.905	212.785
402	1	41	19.295	1	1	1	1	2	4	1	2	2	1						10000	4	2792	2854.21	1											21097.5	2	6130	6070.74	2	42195	4	12780	12940.7	1	65	1	1	55
403	1	39	26.6902					2	4	0	2	2	1	5000	2	1860	1785	2	10000	2	3600	3568.45	2																					13	0	0	7
404	1	35	21.8905	1	1	1	1	2	3	1	2	3	1																16090	2	5245	5074.49	2	21097.5	4	6683	6896.73	2	42195	4	14169	14366.8	1	57	1	1	42	246.67	250.242
405	1	59	24.2376	1	1	1	1	2	5	0	2	1	1											8045	4	3411	3650.92	2						21097.5	2	9218	9084.64	2	42195	4	22565	23070.9	1	38	0	0	34
406	1	35	24.4898					2	4	0	1	2	1	5000	3	1192	1192	1						8045	4	2079	2165.75	1						21097.5	1	7095		2						25	1	0	17
407	1	56	32.0715					1	1	0	2	1	1						10000	3	3580	3580	2											21097.5	4	7670	7952.86	2						25	0	1	20
408	1	46	21.5684	1	1	1	1	2	3	1	2	2	1	5000	3	1351	1351	1																21097.5	2	6169	6108.99	1	42195	4	13100	13268.9	1	79	1	1	63
409	1	58	21.7452	1	1	1	1	2	3	0	1	2	1	5000	4	1208	1214.98	2																21097.5	4	5666	5818.89	2	42195	4	12247	12394.5	2	100	1	1	23
410	1	19	22.3621					3	7	0	2	1	1	5000	3	1062	1062	1	10000	4	2481	2530	2																					45	1	1	30
411	1	30	22.4467					1	2	0	1	3	1											8045	4	2068	2153.81	2	16090	4	4200	4354.37	2											28	0	0	28
412	1	37	23.0056					2	4	0	1	1	1	5000	3	1490	1490	2	10000	3	2984	2984	2											21097.5	3	7037	7037	2						31	0	0	25
413	1	31	26.7134					1	1	1	2	3	2	5000	4	1638	1650.86	2	10000	2	3855	3818.85	2											21097.5	4	8400	8740.46	2						24	0	1	20
414	1	22	25.2475					2	5	0	2	3	2	5000	4	1278	1285.82	2																21097.5	2	6312	6249.19	2						32	0	1	28
415	1	50	23.1481	1		1		2	5	0	2	1	2	5000	3	1264	1264	2	10000	4	2624	2678.88	2																42195	3	14433	14433	2	35	0	1	30
416	1	38	23.821					1	1	1	2	2	2	5000	3	1755	1755	2																21097.5	4	8403	8743.71	2						25	0	1	20
417	1	24	21.3859					1	2	0	1	2	1	5000	4	906	909.921	1	10000	4	1868	1895.64	1																					100	1	1	85
418	1	33	23.3742					2	4	1	2	1	2	5000	3	1549	1549	3																21097.5	2	6964	6887.62	2						32	1	0	28
419	1	30	23.3061					3	6	0	2	1	1	5000	4	1338	1346.57	2																21097.5	2	6555	6487.28	2						41	1	1	32
420	1	32	22.5394	1	1			1	2	1	2	3	1																					21097.5	2	6098	6039.35	1	42195	4	12774	12934.5	1	43	1	1	35	223.275
421	1	36	24.2376					2	3	0	1	1	2	5000	3	1386	1386	3																21097.5	3	6120	6120	2						40	1	1	30
422	1	45	19.7956	1	1	1	1	3	7	1	2	3	1	5000	3	1244	1244	2																21097.5	4	5925	6092.39	1	42195	3	12844	12844	2	60	0	1	52	217.399	219.953
423	1	30	21.9138	1				2	3	0	3	3	3	5000	3	1604	1604	2																					42195	2	18720	18595.7	1	40	0	0	30	272.219
424	1	52	25.954					1	2	0	1	2	2	5000	2	1263	1227.97	2																21097.5	2	5820	5766.55	2						35	1	1	30
425	1	35	25.3918					1	2	0	3	1	3	5000	3	1596	1596	2	10000	3	3608	3608	2																					30	0	0	20
426	1	27	23.0824	1	1			1	1	1	2	2	3																					21097.5	3	8102	8102	2	42195	4	18514	18853.2	2	36.5	0	1	25
427	1	52	21.2498					1	1	0	2	3	3	5000	4	1462	1472.24	1																21097.5	4	7180	7427.29	3						12	0	1	22
428	1	46	21.3792					2	5	1	2	1	1	5000	4	1420	1429.66	1	10000	2	3249	3223.28	2											21097.5	3	7045	7045	1						37	1	1	30
429	1	30	20.5227	1		1		3	7	1	2	1	2						10000	3	2973	2973	4						16090	3	4865	4865	2						42195	2	13180	13118.3	1	35	1	1	27
430	1	30	32.0561					1	2	1	2	1	1	5000	3	2277	2277	2						8045	3	3689	3689	2	16090	5	8312		3											11	0	0	10
431	1	40	25.0438	1	1	1	1	2	3	1	2	1	1						10000	3	4140	4140	3											21097.5	3	6960	6960	2	42195	2	18000	17885.1	1	55	0	0	40
432	1	35	22.4467	1	1	1	1	2	5	0	2	1	2											8045	4	1670	1725.52	2						21097.5	4	4620	4721.14	2	42195	2	11340	11294.3	2	20	1	1	50
433	1	31	19.8583					1	2	0	2	3	1	5000	2	1188	1156.95	2																21097.5	4	5899	6064.9	1						25	0	1	20
434	1	31	28.2004					2	5	0	1	3	1	5000	3	2040	2040	4						8045	4	3480	3730.08	4																5	0	0	3.5
435	1	33	31.8746					2	3	0	2	3	1																16090	3	5924	5924	2	21097.5	4	7800	8092.71	1						20	1	1	14
436	1	30	20.9194	1	1	1	1	2	3	0	1	2	1											8045	4	1553	1600.9	1						21097.5	3	4259	4259	1	42195	3	9081	9081	2	87	1	1	80
437	1	23	21.4844					3	6	1	2	2	1						10000	3	3554	3554	1											21097.5	3	8340	8340	1						19.84	0	0	14
438	1	38	21.7047					2	3	1	2	3	1	5000	3	1220	1220	1						8045	4	2070	2155.98	2						21097.5	3	5820	5820	1						30	1	1	25
439	1	25	21.5476					1	2	0	2	2	1						10000	4	2316	2358.65	3	8045	4	1775	1837.85	2						21097.5	4	5061	5182.63	2						40	0	1	25
440	1	40	25.2048					3	6	0	2	3	1	5000	3	1140	1140	4	10000	3	2820	2820	3																					12	0	0	9
441	1	31	20.8699	1	1	1	1	2	3	1	2	3	2	5000	4	1185	1191.72	2																21097.5	2	5520	5471.9	2	42195	4	11219	11342.7	2	60	1	0	55	197.271	198.433
442	1	56	25.0438	1	1	1	1	2	3	0	2	3	1						10000	4	3210	3292.51	1											21097.5	4	6795	7016.07	2	42195	3	17110	17110	2	48	1	1	35	254.356	261.401
443	1	39	24.0485					1	1	0	1	3	1	5000	3	1264	1264	1																21097.5	2	6196	6135.46	1						50	1	1	30
444	1	26	24.1778	1		1		2	3	0	2	1	1	5000	3	1367	1367	2	10000	4	2789	2851.08	2																42195	2	14332	14259	1	42	0	0	35
445	1	31	21.3859					2	3	1	2	3	2	5000	3	1454	1454	2											16090	4	4908	5120.11	3	21097.5	2	6228	6166.84	2						15	1	0	30
446	1	47	25.9686	1	1			2	3	0	2	1	2																					21097.5	3	5581	5581	2	42195	4	12713	12872	2	60	1	1	50
447	1	28	26.1092					2	3	1	2	3	3	5000	4	1754	1768.76	2	10000	2	3493	3463.29	2	8045	3	2938	2938	2																45	1	0	30
448	1	45	24.8147	1	1			2	3	0	2	2	2																					21097.5	2	6227	6165.86	2	42195	4	12212	12358.7	2	40	0	0	38
449	1	24	25.2478					1	2	0	2	2	1	5000	3	1436	1436	2	10000	3	2977	2977	3											21097.5	4	7328	7585.77	1						6	0	0	37
450	1	16	19.8583					3	8	0	2	3	1	5000	4	1082	1087.6	2						8045	3	2392	2392	2																35	1	1	25
451	1	52	26.7161	1	1			2	5	0	2	3	2																					21097.5	3	6803	6803	1	42195	2	16055	15963.5	2	40	0	0	30	250.513
452	1	45	24.1716	1		1		1	2	0	1	1	2	5000	2	1424	1379.62	2	10000	4	2971	3041.55	2																42195	2	15360	15276.2	1	52	0	0	30
453	1	35	24.5654	1	1			2	3	0	1	2	2																					21097.5	3	4760	4760	2	42195	3	10640	10640	2	60	1	1	50
454	1	49	22.2635					3	8	0	2	2	1	5000	2	1238	1204.32	1	10000	3	2714	2714	1											21097.5	3	5980	5980	1						36	1	1	30
455	1	31	22.0386	1	1			2	4	1	1	1	3	5000	1	1327		2																21097.5	2	6078	6019.73	2	42195	4	12775	12935.6	1	51	1	1	45
456	1	33	29.6846	1	1	1	1	2	4	0	2	2	2						10000	2	2540	2524.25	2											21097.5	2	5940	5884.34	1	42195	3	14872	14872	2	22	0	0	18
457	1	30	21.8359					3	7	0	2	1	2						10000	2	2926	2905.12	2						16090	3	4557	4557	1											26.25	1	1	25
458	1	21	24.0933					2	3	0	2	2	1						10000	4	2790	2852.12	3											21097.5	4	5742	5899.07	1						30	0	1	25
459	1	36	19.5451					3	6	1	2	3	1																16090	4	5338	5589.86	1	21097.5	2	7933	7834.03	2						25	0	0	20
460	1	31	25.6534	1	1			3	6	1	1	1	2																					21097.5	4	7020	7256.21	3	42195	3	15613	15613	2	55	0	0	40
461	1	31	25.922					2	3	0	2	1	1						10000	4	3512	3611	3						16090	4	5616	5895.46	2						42195	1	20193		1	32	0	0	25
462	1	39	20.6869					3	7	0	2	1	1	5000	4	1183	1189.69	1											16090	2	4565	4435.29	2											20	1	1	20
463	1	50	25.0438	1				2	4	0	2	1	2	5000	2	1157	1127.53	2																					42195	3	11961	11961	2	47	1	1	35
464	1	24	23.6101					2	3	0	2	2	1	5000	3	1061	1061	1						8045	3	1919	1919	2																20	0	0	15
465	1	39	22.5197	1	1	1	1	2	3	0	2	1	2						10000	2	3180	3155.36	2											21097.5	3	7170	7170	2	42195	4	15420	15654.6	1	40	0	0	32
466	1	38	25.7995					3	8	1	2	2	1						10000	4	4999	5202.01	2						16090	2	8783	8315.14	3	21097.5	4	11728	12402.5	3						10	0	0	0
467	1	39	21.6619	1	1	1	1	2	3	1	2	3	1						10000	4	2773	2834.36	1											21097.5	3	6460	6460	2	42195	3	14660	14660	2	50	0	0	35	236.81	237.133
468	1	31	21.0724					2	3	1	2	2	1						10000	4	3024	3097.12	3											21097.5	3	7140	7140	2						40	1	1	20
469	1	43	24.5511	1	1	1	1	2	3	0	2	2	1						10000	4	2316	2358.65	2											21097.5	3	5852	5852	2	42195	2	12121	12068.8	2	70	1	0	60
470	1	37	19.2473	1				1	1	1	2	2	1						10000	2	4740	4685.46	1																42195	3	14820	14820	1	100	1	0	84
471	1	38	28.818	1	1			1	1	1	2	3	1	5000	1	1497		1																21097.5	3	7464	7464	2	42195	2	16449	16353	1	60	1	0	50	258.703
472	1	28	21.2245					1	2	0	2	3	2	5000	4	894	897.818	1	10000	4	1890	1918.3	2	8045	3	1496	1496	1																90	1	1	85
473	1	35	20.5857	1				2	5	0	2	3	1	5000	4	1195	1201.83	2																					42195	4	12480	12633.2	1	56	1	1	50	203.353
474	1	18	18.7475					3	7	0	2	1	2	5000	3	1081	1081	1	10000	2	2401	2386.93	2																					45	1	0	45
475	1	34	20.7376	1	1	1	1	3	6	1	2	3	1	5000	3	1360	1360	1																21097.5	4	6233	6418.52	1	42195	2	13693	13626.4	1	50	0	1	38	233.976	235.917
476	1	52	23.1481					2	5	0	2	2	1	5000	3	1140	1140	2																21097.5	2	5774	5721.39	3						30	1	0	25
477	1	57	25.954					3	6	0	2	2	1	5000	3	1320	1320	2						8045	3	2180	2180	2																35	1	1	20
478	1	31	26.2626					2	4	1	2	2	1	5000	3	1513	1513	2	10000	3	2914	2914	1																					27	0	1	20
479	1	45	25.2319					3	7	0	2	2	1	5000	3	1395	1395	1																21097.5	2	6675	6604.79	1	42195	1	15135		2	50	0	1	40
480	1	29	22.7087					2	3	0	2	3	3	5000	3	1333	1333	2																21097.5	4	6514	6716.89	2						28	0	0	20
481	1	21	22.894					2	4	1	2	2	2	5000	1	1304		2											16090	3	4642	4642	2	21097.5	2	6745	6673.32	2						50	1	1	35
482	1	27	24.3018					3	6	0	2	2	1											8045	2	1525	1494.14	1	16090	3	3600	3600	3											60	1	1	55
483	1	28	21.7452	1				3	7	0	2	3	2	5000	3	1259	1259	3																					42195	3	16513	16513	4	26	0	0	19	225.115
484	1	28	20.8699	1	1	1	1	2	3	1	2	3	1											8045	3	2550	2550	1						21097.5	4	6913	7141.95	2	42195	4	15627	15868	1	45	0	1	25	264.515	266.283
485	1	56.5	24.553					3	7	0	2	1	1	5000	3	1243	1243	1	10000	2	2732	2713.79	1											21097.5	2	6000	5943.21	1						13	0	1	30
486	1	47	22.5183					2	3	0	2	2	1	5000	3	1432	1432	3						8045	2	2529	2445.25	3																10	0	0	10
487	1	34	25.8586					2	3	0	2	1	1	5000	4	1141	1147.23	2																21097.5	4	5324	5458.77	2						48	1	1	45
488	1	30	25.9516					1	2	0	2	2	2	5000	3	1102	1102	3											16090	2	3900	3804.94	3											21	0	1	18
489	1	48	25.6772	1				2	3	0	2	3	1	5000	3	1710	1710	3																					42195	2	16140	16047.5	2	20	0	0	12	301.888
490	1	23	20.4824	1				2	4	0	2	1	1						10000	4	2303	2345.16	2																42195	2	10781	10739.7	1	55	0	1	49
491	1	51	25.7457	1		1		2	3	1	2	1	1	5000	3	1745	1745	3	10000	3	3430	3430	2																42195	3	16578	16578	1	40	0	1	28
492	1	33	25.922	1	1	1	1	3	7	0	1	3	2	5000	3	1265	1265	3																21097.5	3	5439	5439	2	42195	3	12989	12989	2	38	1	1	30	205.464	203.646
493	1	33	27.9773					1	2	0	2	1	2	5000	3	1607	1607	2	10000	3	3251	3251	2											21097.5	4	7419	7683.33	2						25	0	0	20
494	1	30	26.2125					1	2	1	2	2	1						10000	3	3871	3871	1											21097.5	2	8781	8659.9	2						26	0	0	23
495	1	28	22.8928	1	1	1	1	2	3	1	2	1	1						10000	3	2625	2625	3											21097.5	3	5749	5749	2	42195	3	12664	12664	1	55	1	1	48
496	1	39	23.0079	1	1	1	1	3	7	0	2	1	1						10000	2	2282	2269.28	2											21097.5	3	5123	5123	2	42195	2	11065	11021.5	2	70	1	1	60
497	1	32	21.1293					1	1	1	3	3	1	5000	3	2336	2336	1						8045	3	3608	3608	1						21097.5	4	10328	10847.5	1						18	0	0	28
498	1	33	20.2415					2	4	1	2	3	1	5000	3	1568	1568	2																21097.5	2	6458	6392.26	1						45	1	1	30
499	1	28	23.1481					1	2	0	2	1	1						10000	3	1960	1960	1											21097.5	4	4330	4418.72	1						70	1	1	50
500	1	32	19.4415					2	3	1	2	2	1	5000	3	1710	1710	2	10000	2	3728	3694.18	2																					28	0	0	18
501	1	38	25.974	1	1	1	1	2	3	0	2	1	1	5000	4	1288	1295.94	3																21097.5	3	6314	6314	2	42195	4	13201	13372.5	1	55	1	1	45
502	1	42	25.954					2	5	0	1	1	1	5000	2	1233	1199.59	3	10000	2	2653	2635.83	2						16090	3	4318	4318	2											45	0	0	35
503	1	33	29.7794					1	1	1	2	3	1	5000	3	1870	1870	3	10000	4	3900	4022.47	2	8045	4	3678	3958.5	3																5	0	0	18
504	1	42	24.6259	1	1	1	1	2	4	0	2	1	1						10000	2	2891	2870.62	2											21097.5	3	6439	6439	3	42195	2	15009	14929	4	57	0	1	35
505	1	29	27.1193					1	2	1	2	1	1	5000	3	1620	1620	2																21097.5	3	6900	6900	1						20	0	1	15
506	1	35	35.0014					1	2	1	2	1	1	5000	3	3400	3400	2																21097.5	2	12000	11775	2						22	0	0	16
507	1	41	20.0351	1				1	2	1	2	3	1	5000	4	1285	1292.9	2																					42195	3	13458	13458	2	57	0	1	45	218.641
508	1	39	19.7888					2	4	0	3	1	1						10000	3	3780	3780	2	8045	2	3360	3213.76	3						21097.5	4	7380	7641.51	1						25	0	0	15
509	1	32	20.334					1	2	0	2	1	1	5000	3	1008	1008	2	10000	3	2105	2105	2																					55	1	1	45
510	1	38	25.8121					2	4	0	1	2	1	5000	4	1155	1161.38	1	10000	2	2567	2550.92	1											21097.5	2	5660	5609.44	1						55	1	1	50
511	1	31	20.6563					2	5	1	1	3	3	5000	4	1338	1346.57	4																21097.5	4	6523	6726.46	4						31	1	1	25
512	1	27	25.2319	1	1	1	1	2	4	0	1	3	1	5000	3	1130	1130	2																21097.5	3	5313	5313	2	42195	2	12267	12213.5	3	80	0	1	45	195.787	194.035
513	1	42	21.8716	1	1			1	2	1	2	3	1																					21097.5	2	6683	6612.62	2	42195	2	12399	12344.4	1	65	1	1	45	236.445
514	1	64	29.6846					1	2	0	2	1	2	5000	4	1511	1521.94	3	10000	3	3910	3910	3																					6	0	0	20
515	1	29	24.1302	1				2	4	0	2	2	1	5000	4	1172	1178.57	1																					42195	4	12179	12324.9	1	52	0	0	40
516	1	44	21.6914	1	1	1	1	2	3	1	2	2	1	5000	4	1336	1344.54	2																21097.5	4	6282	6470.49	2	42195	3	13609	13609	2	40	1	1	36
517	1	31	23.0057	1	1	1	1	1	1	1	2	2	1	5000	3	1296	1296	2																21097.5	3	6162	6162	2	42195	2	12817	12758.6	2	56	1	1	40
518	1	22	21.5213	1	1			2	3	0	2	1	1																					21097.5	3	5238	5238	1	42195	3	11841	11841	1	50	0	0	30
519	1	28	24.5262					3	7	0	2	2	1	5000	3	1525	1525	2	10000	3	3540	3540	2																					18	0	0	16
520	1	28	23.7477	1		1		1	2	1	2	2	3	5000	2	2298	2184.6	3						8045	4	3677	3957.34	4											42195	4	22623	23131.5	3	40	0	0	20
521	1	55	26.7324	1				1	2	0	2	3	2						10000	3	2779	2779	2																42195	3	13924	13924	2	42	0	1	20	235.083
522	1	34	21.0965					2	4	0	1	2	2	5000	3	1112	1112	2	10000	1	2553		2						16090	2	4140	4033.04	2											30	1	1	25
523	1	28	20.2441	1		1		2	4	1	2	1	1	5000	2	1329	1290.27	2	10000	2	2812	2792.71	2																42195	3	12851	12851	1	60	1	1	50
524	1	35	27.2181					1	1	1	2	1	3	5000	4	2319	2344.86	3						8045	2	5100	4770.5	3																9	0	0	7
525	1	29	21.8716	1	1	1	1	1	2	1	2	3	2	5000	3	1658	1658	2																21097.5	3	7710	7710	2	42195	4	17574	17879.3	2	40	0	0	30	279.232	286.096
526	1	24	24.7372					2	3	1	2	3	2	5000	2	2029	1940.08	3																21097.5	3	8826	8826	2						25	0	0	20
527	1	28	21.6221	1	1	1	1	1	2	1	2	3	2	5000	4	1180	1186.66	1																21097.5	3	5460	5460	1	42195	2	12180	12127.3	2	50	1	1	40	202.364	200.878
528	1	38	20.0351					2	4	1	2	1	1	5000	4	1175	1181.6	2											16090	3	4084	4084	3	21097.5	3	5538	5538	2						48	1	1	44
529	1	33	28.2599					3	7	0	1	1	1	5000	3	1264	1264	3	10000	2	2704	2686.16	2																					15	1	0	10
530	1	22	30.1847					2	3	1	2	3	1	5000	3	1837	1837	2																21097.5	3	8523	8523	2						18	0	0	14
531	1	53	24.3018					3	6	0	2	3	1	5000	4	1289	1296.95	2	10000	4	2692	2749.79	2	8045	2	2161	2099.55	2																39	1	0	25
532	1	27	24.8147	1		1		2	4	0	1	3	2	5000	3	1226	1226	2	10000	4	2662	2718.49	2																42195	3	14442	14442	2	31	1	1	20	230.449	237.081
533	1	35	25.052	1	1	1	1	2	3	0	2	3	2	5000	2	1364	1323.23	2																21097.5	2	6506	6439.28	2	42195	4	14399	14603.3	2	55	1	1	40	233.629	235.391
534	1	34	22.5603					3	6	0	2	3	1	5000	4	1275	1282.78	2	10000	4	2734	2793.63	2																					22	0	1	18
535	1	40	22.1768	1	1	1	1	1	2	0	2	3	1																16090	4	3295	3389.26	1	21097.5	3	4464	4464	2	42195	3	9600	9600	2	87	1	1	70	161.659	160.641
536	1	41	23.6538					2	3	0	2	3	1	5000	4	1568	1579.78	2																21097.5	2	7805	7709.18	2						45	1	1	35
537	1	33	24.3819	1				2	3	0	2	3	1																16090	4	4242	4399.53	1						42195	3	12900	12900	2	45	1	1	30	220.255
538	1	21	23.7477					2	4	0	2	1	2						10000	2	2685	2667.41	2											21097.5	2	6044	5986.38	4						15	1	0	15
539	1	45	27.798					1	2	0	2	1	3	5000	2	1520	1469.54	2	10000	3	3383	3383	3											21097.5	5	7567		4						30	0	0	20
540	1	21	20.3264					3	8	0	2	3	1	5000	3	888	888	1	10000	4	1826	1852.41	1																					80	1	1	72
541	1	27	25.9302					2	4	0	2	3	2	5000	3	1434	1434	2																21097.5	3	6482	6482	2						21	1	0	12
542	1	21	20.7178					2	4	1	2	2	1	5000	4	1620	1632.58	2	10000	4	3746	3858.85	3																					18	0	0	13
543	1	32	22.5183	1		1		1	2	0	2	1	1	5000	3	1063	1063	2	10000	2	2318	2304.88	2																42195	4	10139	10239.9	2	100	0	0	55
544	1	39	19.6603	1		1		2	3	1	2	2	1	5000	2	1444	1398.39	2	10000	2	2913	2892.31	2																42195	4	14940	15160.1	2	58	0	0	40
545	1	45	23.8496	1				2	3	0	2	1	1	5000	1	1980		4											16090	4	4125	4273.8	2						42195	3	12510	12510	1	40	0	1	30
546	1	27	22.3776	1	1	1	1	3	7	1	2	3	1						10000	4	2576	2628.87	2											21097.5	4	5557	5703.98	1	42195	3	13496	13496	1	60	1	1	50	206.316	208.589
547	1	41	25.7943	1	1			1	2	1	2	2	1																					21097.5	3	6616	6616	3	42195	3	14060	14060	2	55	0	0	30
548	1	30	21.9138	1	1			2	4	0	2	1	1																					21097.5	4	5650	5802.01	2	42195	3	12029	12029	1	54	0	1	45
549	1	33	25.922					1	2	1	2	3	2	5000	4	1734	1748.42	1											16090	2	6687	6412.31	1											22	0	0	20
550	1	22	24.0241					2	5	0	2	2	2	5000	4	1200	1206.89	3																21097.5	3	6482	6482	3						25	0	0	20
551	1	16	22.9134					3	6	0	1	2	3	5000	4	1265	1272.66	2	10000	3	2918	2918	1																					25	1	1	20
552	1	28	23.9491	1	1	1	1	2	3	0	2	2	2	5000	3	1109	1109	2																21097.5	4	5180	5307.49	2	42195	3	12289	12289	2	34	1	1	28
553	1	52	25.0177					2	5	1	2	1	1	5000	3	1740	1740	2	10000	3	3720	3720	2						16090	2	5880	5666.55	1											15	1	0	15
554	1	20	28.9425					2	3	0	2	1	1	5000	4	1148	1154.3	2																21097.5	4	5502	5646.05	2						30	1	0	25
555	1	46	25.8586	1	1			1	1	0	2	3	2																					21097.5	2	7518	7429.06	1	42195	2	16638	16539.7	1	37	0	1	25	273.82
556	1	28	21.6407					1	2	0	1	1	2						10000	4	2338	2381.47	1											21097.5	3	5280	5280	1						62	1	1	43
557	1	36	20.5756					2	4	1	2	2	1	5000	4	1194	1200.82	1											16090	4	4188	4341.47	1	21097.5	2	5809	5755.76	2						36	1	1	30
558	1	43	26.6902	1	1	1	1	1	2	0	2	3	3						10000	2	3367	3339.39	2											21097.5	3	7652	7652	3	42195	4	20100	20500.4	3	35	0	0	18	286.125	285.256
559	1	26	23.7477					2	3	0	2	2	1	5000	4	1024	1029.01	2	10000	3	2124	2124	2																					48	1	1	44
560	1	39	26.7324					2	3	0	2	1	1	5000	3	1620	1620	4	10000	4	3225	3308.29	1																					10	0	0	6
561	1	32	21.8716					1	2	1	2	3	2	5000	3	1574	1574	2																21097.5	3	7200	7200	2						26	1	1	20
562	1	39	23.2712	1	1			1	1	1	2	1	1																					21097.5	3	9000	9000	2	42195	2	19920	19779.3	2	40	1	1	30
563	1	26	25.0438					3	7	1	2	3	2	5000	4	2106	2127.31	3	10000	3	4526	4526	3																					10	0	0	7
564	1	33	21.1293					1	2	1	1	1	1	5000	2	1788	1718.59	1						8045	3	2959	2959	1	16090	5	6472		1											46	1	1	40
565	1	24	20.8699	1	1	1	1	2	3	1	2	2	2																16090	4	4500	4677.67	2	21097.5	3	6480	6480	2	42195	4	14400	14604.3	2	40	0	1	25
566	1	22	22.5779					1	2	0	1	1	2	5000	4	1095	1100.73	3	10000	3	2320	2320	3											21097.5	2	5054	5013.65	2						65	1	1	55
567	1	37	23.7496					1	1	1	2	3	1						10000	3	2827	2827	1											21097.5	4	6442	6640.36	1						30	0	1	25
568	1	31	20.1562	1		1		2	3	1	1	1	3	5000	4	1150	1156.32	3											16090	3	4020	4020	2						42195	3	11205	11205	2	42	0	1	35
569	1	30	23.3747	1	1	1	1	2	3	0	2	2	3	5000	2	1447	1401.2	4																21097.5	4	6327	6518.24	1	42195	4	14136	14332.9	2	45	1	1	30
570	1	33	21.7047					2	3	0	2	3	2	5000	3	1065	1065	1																21097.5	4	5149	5274.95	1						55	1	1	48
571	1	41	28.4444	1				2	3	0	2	3	1						10000	2	3000	2978.06	2																42195	4	14100	14295.9	2	50	0	0	45	236.67
572	1	42	23.0057	1	1			1	1	1	2	3	1																					21097.5	3	6420	6420	2	42195	3	14820	14820	2	48	0	0	35	235.533
573	1	33	26.7324					2	3	0	2	3	1	5000	3	1433	1433	3																21097.5	3	6888	6888	2						21	1	0	18
574	1	39	24.4898					2	3	0	2	1	1	5000	4	1004	1008.82	2						8045	4	1666	1721.25	2						21097.5	2	4822	4785.25	3						17	1	1	45
575	1	42	21.2331	1		1		1	2	0	2	2	1	5000	3	1052	1052	2	10000	3	2294	2294	3																42195	3	10850	10850	3	45	0	1	25
576	1	40	25.1119	1	1	1	1	2	3	0	2	1	3						10000	3	2912	2912	2											21097.5	4	6268	6455.64	2	42195	4	16080	16335.2	2	55	1	1	45
577	1	37	20.8699					2	3	1	2	1	2						10000	4	3300	3387.26	2											21097.5	2	7980	7879.86	2						18	0	0	12
578	1	29	21.6407					3	8	0	2	2	1	5000	4	907	910.93	1	10000	1	1920		1	8045	2	1519	1488.38	1																80	1	1	70
579	1	47	24.7028	1		1		3	6	0	2	1	3	5000	4	1069	1074.46	1	10000	3	2341	2341	2																42195	3	12720	12720	2	70	1	1	60
580	1	27	18.9126					2	3	1	2	1	1	5000	4	1188	1194.75	1	10000	4	2395	2440.63	1											21097.5	3	5267	5267	1						68	1	1	55
581	1	31	22.4467					1	2	0	2	3	1											8045	4	1669	1724.45	2	16090	4	3510	3617.16	2	21097.5	4	4624	4725.32	2						73	1	1	60
582	1	30	22.0195	1				1	1	1	2	3	2						10000	5	3308		2	8045	2	3105	2979.7	2											42195	3	18585	18585	1	30	1	0	25	303.372
583	1	38	22.0735					3	6	0	2	3	1	5000	3	1218	1218	1	10000	4	2578	2630.95	2											21097.5	4	5590	5738.76	1						48	1	1	35
584	1	30	23.7477	1	1	1	1	1	2	0	1	3	1	5000	2	924	905.109	1																21097.5	3	4304	4304	1	42195	4	9278	9362.41	1	112	1	1	90	152.294	150.228
585	1	33	25.1122	1	1			1	1	0	3	1	1																					21097.5	4	5560	5707.14	1	42195	2	12555	12499	1	55	1	1	50
586	1	27	23.0834					2	3	0	3	2	1	5000	3	1620	1620	3	10000	3	3310	3310	3																					25	0	0	15
587	1	28	26.7324	1	1	1	1	2	5	0	2	1	1	5000	4	1130	1136.11	1																21097.5	3	5789	5789	2	42195	4	12536	12690.6	2	48	0	0	35
588	1	30	25.5447					2	3	0	1	1	1	5000	4	1440	1449.93	3											16090	4	4440	4612.87	2											30	0	0	16
589	1	33	22.6817					2	3	0	2	2	1																16090	3	4680	4680	2	21097.5	3	7020	7020	4						20	0	0	12
590	1	30	24.4108	1	1	1	1	3	8	0	2	2	2	5000	4	968	972.477	2																21097.5	4	4920	5034.87	1	42195	2	10517	10477.7	2	63	1	1	55
591	1	41	22.8059	1	1	1	1	1	1	0	1	3	1						10000	3	2173	2173	1											21097.5	3	4843	4843	1	42195	3	10065	10065	1	55	1	1	40	181.964	177.787
592	1	28	20.7741	1	1	1	1	2	3	1	3	1	1						10000	4	2401	2446.86	1											21097.5	4	5305	5438.79	1	42195	4	11190	11313	1	91	1	1	79
593	1	37	26.6902					3	7	0	3	3	2	5000	2	992	970.258	2	10000	2	2196	2184.22	1						16090	4	3321	3416.78	1											60	1	1	50
594	1	30	19.1761	1				2	3	1	1	1	3																16090	2	4440	4317.2	2						42195	2	13289	13226.2	2	55	1	1	45
595	1	44	24.441	1				2	4	0	2	1	1						10000	4	2030	2062.69	2																42195	4	9518	9606.85	2	108	1	1	100
596	1	36	23.569					1	2	0	2	1	1						10000	3	2390	2390	2						16090	3	4013	4013	2	21097.5	3	5400	5400	2						40	0	1	30
597	1	58	21.7452					2	5	0	1	1	1																16090	4	4145	4295.28	1	21097.5	3	5607	5607	2	42195	5	11690		1	75	1	1	66
598	1	41	19.4767	1	1			1	2	0	1	2	2																					21097.5	2	4990	4950.66	2	42195	2	10579	10539.2	2	61	0	1	45
599	1	19	21.7047					2	4	0	2	2	2	5000	2	1070	1044.75	3	10000	3	2414	2414	2																					40	1	1	28
600	1	26	20.2515					3	7	1	1	3	2	5000	3	1710	1710	2	10000	3	4800	4800	1																					20	1	0	15
601	1	37	24.4898	1	1	1	1	2	3	0	2	1	1	5000	3	1276	1276	1																21097.5	4	5788	5947.63	1	42195	3	13027	13027	1	60	1	1	50
602	1	40	22.1497					2	5	0	2	3	1	5000	4	1277	1284.8	2	10000	3	2975	2975	3																					30	1	0	25
603	1	35	20.4712					1	1	0	2	3	1	5000	3	1246	1246	2	10000	2	2691	2673.33	2											21097.5	2	5963	5906.91	1						35	1	1	30
604	1	28	22.6817	1	1	1	1	2	3	0	1	2	1																16090	2	3400	3327.52	1	21097.5	4	4465	4559.4	2	42195	4	9615	9705.68	2	88	1	1	75
605	1	18	23.0056					2	4	0	2	3	1	5000	2	1035	1011.36	2											16090	2	4200	4089.96	3											70	1	1	50
606	1	26	23.8048					2	3	0	2	1	1	5000	2	1511	1461.13	2	10000	4	3147	3226.26	2																					23	0	0	19
607	1	27	24.8356					2	3	0	2	3	2	5000	3	1450	1450	2																21097.5	2	7260	7177.02	2						24	1	0	20
608	1	51	25.2108	1	1	1	1	1	2	0	2	3	2																16090	3	4929	4929	2	21097.5	3	6646	6646	2	42195	3	14247	14247	2	50	1	1	35	242.723	243.977
609	1	24	20.3423					2	3	0	1	3	2						10000	3	2241	2241	1						16090	4	3630	3744.74	1	21097.5	2	5099	5057.93	2						35	1	1	30
610	1	27	28.0281					1	2	0	1	3	1	5000	2	1357	1316.64	2																21097.5	3	7013	7013	2						15	0	0	14
611	1	31	20.0404					3	6	0	2	3	3	5000	3	1130	1130	3																21097.5	2	4975	4935.9	2	42195	1	10882		2	40	1	1	31		184.295
612	1	34	24.5028					2	5	1	2	2	3	5000	3	1370	1370	2											16090	3	4650	4650	2	21097.5	1	6788		2						29	1	1	23
613	1	35	25.2525					1	2	0	3	2	1						10000	3	3096	3096	2											21097.5	3	6622	6622	2						18	0	0	16
614	1	32	25.2475	1	1	1	1	2	3	0	2	1	2	5000	2	1260	1225.13	3																21097.5	3	7320	7320	4	42195	3	11593	11593	2	50	1	1	22
615	1	23	21.1534					3	7	0	2	2	1	5000	3	1129	1129	2																21097.5	2	5460	5412.94	2						37	1	1	32
616	1	26	22.3577					1	2	1	2	3	3	5000	3	1751	1751	3	10000	4	3541	3641.67	2											21097.5	4	7965	8270.47	2						30	1	1	25
617	1	29	24.858					1	2	1	1	2	1																16090	3	5481	5481	2	21097.5	4	7069	7308.57	1						29	0	1	20
618	1	23	22.1146					1	2	0	2	2	1	5000	2	1261	1226.08	3	10000	2	2460	2445.23	2																					10	0	1	25
619	1	35	23.8048					2	3	0	2	2	1	5000	4	1170	1176.55	2																21097.5	4	5295	5428.28	2						30	0	1	25
620	1	19	21.2498					2	3	0	2	3	3	5000	2	1020	997.028	2						8045	4	1941	2016.4	3						21097.5	3	5230	5230	2						55	1	1	40
621	1	35	30.5703					1	2	0	2	3	1																16090	4	5880	6187.07	2	21097.5	3	8820	8820	2						28	0	1	22
622	1	48	21.8395					2	3	1	2	1	1	5000	4	1503	1513.82	2																21097.5	3	7149	7149	2						30	0	1	25
623	1	32	21.8716					2	3	1	2	1	1						10000	2	3480	3450.51	2											21097.5	3	7800	7800	2						20	1	0	18
624	1	38	23.8048					3	7	0	1	2	1						10000	4	2294	2335.83	2	8045	4	1862	1931.28	2						21097.5	3	4994	4994	1						65	1	1	55
625	1	41	20.7376	1	1			1	1	0	2	1	2																					21097.5	4	4534	4631.37	2	42195	3	9807	9807	1	95	0	1	75
626	1	31	22.6079	1				2	5	0	2	1	1	5000	4	1139	1145.2	2																21097.5	1	5249		2	42195	4	11426	11554.3	1	60	1	0	50
627	1	26	26.048					2	5	0	2	2	2						10000	2	2815	2795.67	2						16090	3	4668	4668	2	21097.5	3	6285	6285	2						39	1	1	30
628	1	54	23.569					3	7	0	2	3	1	5000	3	1290	1290	2											16090	3	4514	4514	2											105	1	1	77
629	1	35	23.8813					2	3	0	2	3	1	5000	2	1353	1312.88	1	10000	3	2702	2702	1											21097.5	3	6600	6600	1						30.7	1	1	24.8
630	1	24	22.2178					1	2	0	2	2	1	5000	3	1080	1080	2	10000	3	2235	2235	1																					37	0	1	30
631	1	54	24.2172					2	3	1	2	3	1	5000	3	1698	1698	2	10000	3	3623	3623	2																					21	0	0	18
632	1	41	27.4583	1	1	1	1	2	5	0	2	1	2	5000	2	1440	1394.64	3																21097.5	4	5700	5854.75	2	42195	2	13400	13336.2	2	22	1	1	50
633	1	27	27.2262					3	7	0	1	1	1	5000	2	1063	1038.07	2																21097.5	4	5029	5149.08	1	42195	5	11051		1	56	1	1	47
634	1	40	20.6221	1				1	2	1	2	2	1						10000	3	2684	2684	1						16090	5	4299		1						42195	2	12549	12493	1	105	1	1	87
635	1	31	47.1846	1		1		1	2	1	2	2	1	5000	4	1801	1816.56	1	10000	2	4548	4497.77	2																42195	3	22680	22680	4	55	0	0	30
636	1	28	20.201	1	1	1	1	2	3	0	2	2	1						10000	3	2065	2065	2											21097.5	2	4470	4438.41	2	42195	4	9483	9571.2	2	92	1	1	70
637	1	37	24.0445	1	1			1	2	0	2	3	1																					21097.5	2	5060	5019.55	2	42195	2	10480	10440.9	1	60	0	1	50	184.689
638	1	35	23.6605	1		1		2	4	0	2	3	2						10000	3	2308	2308	2						16090	3	3868	3868	2						42195	2	10467	10428	1	65	0	1	48	190.13	190.717
639	1	16	17.5578					1	2	0	2	2	1	5000	4	1131	1137.12	1						8045	2	1900	1852.33	3						21097.5	4	5654	5806.23	3						43	0	1	40
640	1	32	19.3457	1	1	1	1	1	1	0	1	1	1	5000	4	869	872.607	2																21097.5	4	3848	3917.91	1	42195	4	8152	8217.09	1	110	1	1	100
641	1	30	23.7477	1	1			2	4	0	2	3	2																					21097.5	2	4668	4633.56	1	42195	3	10136	10136	1	90	1	1	80	164.404
642	1	21	26.4268					2	5	0	1	1	1	5000	3	1334	1334	2																21097.5	3	6756	6756	2						23	0	0	16
643	1	27	23.906					2	3	0	2	2	1						10000	4	2853	2917.99	3											21097.5	3	6137	6137	2						20	0	0	16
644	1	49	19.7956	1	1	1	1	3	7	1	2	2	1											8045	2	2167	2105.22	2						21097.5	3	5935	5935	2	42195	2	12858	12799.2	1	47	1	1	40
645	1	44	22.3252	1	1	1	1	2	4	1	1	2	1																16090	3	5603	5603	2	21097.5	2	7230	7147.7	2	42195	2	16973	16870.8	2	43	1	1	25
646	1	47	21.1901					2	3	1	1	3	1						10000	4	3266	3351.45	2											21097.5	3	7376	7376	2	42195	1	20544		2	40	1	1	35		272.858
647	1	26	20.7749					4	10	0	2	1	1	5000	4	900	903.869	2											16090	4	3035	3114.79	1	21097.5	4	4017	4093.25	1						105	1	1	90
648	1	21	21.3856					2	5	0	1	1	2						10000	4	2401	2446.86	2											21097.5	4	5398	5536.59	2						40	1	1	34
649	1	23	23.5923					2	5	1	2	2	2																16090	3	5989	5989	2	21097.5	2	7883	7785.27	2						26	0	0	18
650	1	38	22.0195					2	4	1	2	1	3						10000	3	2824	2824	2	8045	4	2219	2318.1	2						21097.5	2	6355	6291.33	2						55	1	1	40
651	1	19	21.781					2	5	0	2	2	2	5000	3	1031	1031	1	10000	4	2218	2257.08	1																					38	1	0	30
652	1	48	25.5361					3	7	0	2	1	1	5000	3	1371	1371	2	10000	3	2896	2896	1											21097.5	2	6370	6306.03	1						42	1	1	35
653	1	27	25.0438					2	3	1	2	2	1	5000	4	1649	1662.04	2																21097.5	3	8110	8110	2						34	1	1	28
654	1	25	22.6263					2	5	0	2	1	1	5000	3	988	988	3																21097.5	2	4740	4704.49	2						55	0	1	45
655	1	54	23.0056	1		1		1	1	0	2	3	1	5000	3	1121	1121	1	10000	3	2318	2318	1																42195	3	11580	11580	1	70	0	0	50	188.957	196.891
656	1	32	21.9138					2	3	0	1	1	1	5000	4	1564	1575.72	2	10000	3	3314	3314	2																					15	0	0	12
657	1	31	23.845					1	1	1	2	2	1	5000	4	1980	1998.82	2	10000	3	3902	3902	1																					21	1	1	15
658	1	30	20.4712	1		1		2	4	0	2	2	2	5000	3	930	930	2	10000	4	1840	1866.82	2																42195	4	8815	8891.16	1	90	1	1	67
659	1	36	22.4467					3	8	0	2	2	1	5000	4	990	994.684	2																21097.5	2	4800	4763.59	2						50	1	1	40
660	1	52	22.1497	1	1	1	1	1	2	0	2	2	1	5000	4	1175	1181.6	1																21097.5	3	5461	5461	1	42195	2	11541	11493.6	1	56	1	1	50
661	1	28	22.2635	1	1			1	2	0	1	2	2																					21097.5	3	5580	5580	2	42195	2	12150	12097.5	2	65	1	1	40
662	1	31	24.5262	1	1	1	1	2	3	1	2	1	1	5000	3	1371	1371	2																21097.5	4	6420	6616.99	2	42195	4	13879	14068.7	2	55	0	1	45
663	1	45	21.0636	1	1	1	1	1	2	0	2	2	1						10000	2	2380	2366.17	1											21097.5	4	5179	5306.44	2	42195	2	11807	11757.4	1	90	1	1	75
664	1	32	24.536					2	4	1	2	2	2	5000	4	1695	1708.78	2																21097.5	3	8215	8215	2						22	0	1	15
665	1	46	20.6563	1	1	1	1	2	4	1	2	2	1	5000	4	1240	1247.36	2																21097.5	3	5615	5615	1	42195	2	12600	12543.6	1	60	1	0	55
666	1	29	23.0824	1	1			2	4	1	2	2	1																					21097.5	4	5902	6068.07	1	42195	3	13162	13162	2	60	1	1	40
667	1	43	23.9702					1	2	1	2	1	1	5000	4	1666	1679.31	1	10000	2	3764	3729.53	3											21097.5	4	8240	8567.36	1						25	0	1	20
668	1	39	23.8048	1				1	2	0	2	1	1						10000	3	2427	2427	1																42195	2	11606	11558.1	1	50	0	1	45
669	1	44	24.5654	1	1			1	2	0	2	1	1																					21097.5	4	4350	4439.55	2	42195	2	9300	9269.22	2	65	1	1	60
670	1	29	23.8496					2	3	1	2	3	1																16090	2	6000	5777.91	2	21097.5	3	7620	7620	2						24	0	1	15
671	1	34	22.7273					1	2	1	1	3	2	5000	3	1560	1560	2																21097.5	2	6660	6590.11	2						25	0	1	20
672	1	25	19.7652					1	1	0	2	1	1																16090	3	3860	3860	2	21097.5	3	5029	5029	1						32	1	1	30
673	1	31	21.3892					3	7	1	2	2	2	5000	4	1162	1168.46	2																21097.5	3	5678	5678	2	42195	5	12218		2	60	1	1	50
674	1	39	27.8903					1	2	0	2	1	2	5000	3	1516	1516	2																21097.5	4	7268	7521.5	2						15	0	0	11
675	1	46	34.3924	1		1		2	4	1	2	3	1	5000	4	1327	1335.43	2						8045	2	2100	2041.93	2											42195	4	12423	12574.8	1	62	1	1	55	205.142	233.097
676	1	24	21.3041					2	4	1	2	3	1	5000	3	1583	1583	4	10000	3	3185	3185	3											21097.5	5	6588		2						23	0	0	15
677	1	30	23.6772					3	8	0	2	2	1						10000	3	1945	1945	2											21097.5	2	5532	5483.69	2						20	1	1	15
678	1	35	20.1321					1	2	1	1	3	1	5000	3	1234	1234	2	10000	4	2538	2589.3	2											21097.5	4	5734	5890.63	2						70	1	1	63
679	1	33	25.5207	1	1	1	1	2	5	0	2	1	3						10000	3	3234	3234	2											21097.5	2	7378	7292.32	2	42195	2	20714	20561.9	3	15	0	1	10
680	1	57	22.7949					1	1	0	3	1	1	5000	3	1381	1381	2	10000	3	2876	2876	2																42195	1	21600		2	35	1	1	25
681	1	29	23.0824					2	5	0	2	3	1	5000	2	1560	1506.9	2																21097.5	2	8501	8387.45	2						31	0	0	15
682	1	30	23.3747	1	1	1	1	2	3	0	2	1	1	5000	3	1106	1106	1																21097.5	4	5256	5387.3	1	42195	4	11332	11458.2	1	59	0	1	53
683	1	36	27.9962					2	3	0	1	2	2						10000	2	3180	3155.36	3											21097.5	2	7320	7235.65	2						23	0	0	18
684	1	49	24.193					2	4	0	2	2	1	5000	2	1758	1690.85	2	10000	2	3900	3863	2																					12	0	0	10
685	1	37	21.8359	1	1			2	3	0	2	1	1																					21097.5	4	6197	6380.35	2	42195	4	14640	14851.3	2	45	1	1	40
686	1	22	31.4564					2	3	1	2	2	3	5000	3	1920	1920	3																21097.5	3	10800	10800	4						15	1	0	15
687	1	29	28.6596					2	3	0	2	1	3						10000	4	3905	4027.79	3											21097.5	3	6853	6853	3						33	0	0	20
688	1	19	23.8048					3	6	0	2	1	1	5000	4	983	987.617	1																21097.5	4	4874	4986.71	1						65	1	1	45
689	1	37	25.922					1	2	0	2	1	1						10000	4	3510	3608.89	2											21097.5	4	8280	8610.61	1						25	0	0	21
690	1	31	32.557	1	1			1	2	1	2	1	1																					21097.5	3	8160	8160	2	42195	2	18600	18477.3	2	32	0	1	25
691	1	32	26.1172	1	1	1	1	2	4	0	1	3	2	5000	2	1259	1224.19	2																21097.5	3	5580	5580	2	42195	4	8950	9028.52	2	36	0	0	30	210.228	207.533
692	1	43	32.9686					2	3	0	2	3	1						10000	2	3732	3698.11	4	8045	4	3066	3258.48	3																16	0	0	7
693	1	32	20.4467					2	3	1	2	1	2	5000	3	1534	1534	2																21097.5	3	7081	7081	2						30	0	1	27
694	1	34	25.7457	1		1		1	1	1	2	3	2						10000	2	3660	3627.4	2						16090	4	5356	5609.6	2						42195	2	18005	17890	2	45	0	0	35	269.198	292.653
695	1	31	26.6554					1	2	0	1	3	1	5000	3	1170	1170	3	10000	3	2475	2475	3											21097.5	4	5130	5255.01	1						50	1	0	40
696	1	34	22.3341					3	6	0	1	2	2						10000	3	2465	2465	2											21097.5	3	6030	6030	2						22	1	0	18
697	1	24	20.5857					2	5	0	1	1	1	5000	4	1426	1435.74	1						8045	4	2573	2707.2	1	16090	2	5284	5110.99	1											29.45	0	0	20
698	1	47	24.3707					1	2	1	2	3	1	5000	4	2165	2187.53	4						8045	3	2928	2928	3																18	0	0	10
699	1	38	27.123	1	1	1	1	1	1	0	2	3	1	5000	3	1860	1860	2																21097.5	3	8280	8280	2	42195	4	17878	18194.1	2	42	0	0	30	296.801	308.787
700	1	41	25.974					2	3	1	2	3	2	5000	3	1812	1812	2						8045	2	2955	2841.29	1																21	1	0	14
701	1	18	20.2441					2	3	1	2	1	2	5000	2	1548	1495.7	2						8045	4	2657	2800.35	3																20	1	1	18
702	1	20	21.2331	1				2	3	0	1	3	3	5000	3	1230	1230	2																					42195	2	12910	12850.8	2	35	0	0	30	215.614
703	1	22	20.6221					2	4	0	2	1	3	5000	4	1003	1007.81	2						8045	3	1700	1700	2																50	1	1	45
704	1	43	21.4996					2	3	1	2	2	1	5000	3	1426	1426	1						8045	4	2318	2426.36	1						21097.5	2	6636	6566.61	1						16	1	0	30
705	1	23	19.1761	1				4	9	1	2	2	3	5000	4	1350	1358.72	2																					42195	3	15276	15276	4	45	0	0	25
706	1	40	25.2525					1	2	0	2	2	1	5000	3	1410	1410	2	10000	4	2910	2977.65	2											21097.5	3	6690	6690	2						13	1	1	25
707	1	25	21.0438	1		1		2	4	0	2	2	1	5000	2	1050	1025.67	2	10000	4	2218	2257.08	2																42195	2	11703	11654.3	2	51	1	1	43
708	1	39	25.3575					2	5	0	2	3	1	5000	4	1158	1164.41	2																21097.5	3	5423	5423	2						37	0	1	33
709	1	50	27.4583					2	3	0	2	3	1						10000	4	2880	2946.24	4						16090	1	5400		3	21097.5	3	6900	6900	3						17	0	1	15
710	1	47	24.0906	1	1	1	1	2	3	0	1	2	1	5000	3	1250	1250	1																21097.5	4	5860	6023.69	1	42195	3	13170	13170	1	70	0	1	45
711	1	25	23.1481					2	3	0	2	1	1	5000	4	1454	1464.13	2						8045	4	2721	2871.53	2																25	1	0	15
712	1	35	21.6407					3	8	0	2	3	1	5000	3	1251	1251	1	10000	3	2757	2757	1																					40	1	0	28
713	1	31	25.9689					1	2	0	2	3	3	5000	4	1436	1445.88	4	10000	2	2651	2633.85	2	8045	4	2400	2516.35	3																21	1	1	16
714	1	44	21.4389					2	3	1	2	1	2	5000	4	1361	1369.87	2						8045	1	2551		2						21097.5	2	6660	6590.11	1						35	1	1	30
715	1	30	27.5482	1	1	1	1	2	3	0	2	1	1	5000	4	1072	1077.49	1																21097.5	2	4860	4822.68	1	42195	2	11505	11457.9	1	72	1	0	55
716	1	28	21.1727	1	1	1	1	2	4	1	1	2	2	5000	4	1500	1510.78	1																21097.5	2	7352	7266.92	2	42195	2	18600	18477.3	2	30	0	1	25
717	1	33	23.7477					3	7	0	1	3	2																16090	4	4440	4612.87	2	21097.5	4	5723	5879.02	2						55	1	1	50
718	1	43	30.5513	1	1	1	1	2	3	0	2	1	1	5000	3	1546	1546	2																21097.5	2	7020	6942.39	2	42195	2	15120	15038.8	1	40	1	1	30
719	1	28	22.7949					2	4	1	1	2	1	5000	3	1454	1454	2																21097.5	3	6850	6850	2						20	0	0	15
720	1	31	21.9969					1	1	0	2	3	2	5000	2	957	936.75	1	10000	4	2020	2052.36	2											21097.5	3	4485	4485	2						65	1	1	50
721	1	30	20.419	1	1	1	1	3	8	1	2	2	1	5000	3	1320	1320	1																21097.5	3	6240	6240	2	42195	2	14760	14682.6	1	40	1	1	30
722	1	33	24.1355	1	1			2	3	0	2	2	1																					21097.5	4	5462	5603.94	1	42195	2	12720	12662.5	1	35	1	1	25
723	1	39	24.209					2	5	1	2	3	3	5000	2	1572	1518.09	2	10000	2	3205	3179.97	2											21097.5	2	4260	4231.3	2						28	1	1	25
724	1	29	22.9134					2	4	0	1	3	2	5000	2	1110	1082.85	2																21097.5	3	5281	5281	2						55	1	1	40
725	1	46	22.1332					2	4	0	1	1	1	5000	3	1025	1025	1																21097.5	3	4780	4780	2						75	1	0	60
726	1	37	23.8496	1		1		2	3	0	2	3	1	5000	4	1005	1009.83	2	10000	3	2205	2205	2																42195	3	10980	10980	2	60	1	1	45	182.393	184.178
727	1	27	21.8359	1	1	1	1	1	1	0	2	2	1	5000	4	1116	1121.96	3																21097.5	4	5798	5958.19	3	42195	2	13920	13851.2	2	60	1	1	40
728	1	31	24.8506					1	1	1	1	2	1	5000	4	1500	1510.78	1																21097.5	3	7740	7740	2						22	1	0	12.5
729	1	36	23.2713					1	2	1	2	1	1	5000	4	1380	1389.12	2	10000	4	2929	2997.54	1											21097.5	2	6564	6496.1	1						35	1	1	35
730	1	45	27.2262	1	1			2	3	0	2	3	2																					21097.5	2	6600	6531.35	2	42195	2	15600	15513.6	2	30	0	1	30	241.723
731	1	33	22.1946					3	6	0	2	2	2											8045	4	1981	2059.61	2						21097.5	4	5353	5489.26	2						28	1	1	20
732	1	47	24.5511					1	2	0	2	1	1						10000	3	2504	2504	2											21097.5	3	5386	5386	2						40	0	1	35
733	1	21	18.2884					2	3	1	3	3	1						10000	3	3350	3350	3											21097.5	4	6820	7042.73	1						35	0	1	25
734	1	32	18.1985	1	1			3	8	1	1	3	2																					21097.5	4	5910	6076.53	2	42195	4	12530	12684.4	1	60	1	1	45	219.97
735	1	24	21.3859					2	3	1	2	3	2	5000	2	1143	1114.23	2	10000	4	2301	2343.09	1	8045	2	1866	1820	2																32	0	1	25
736	1	56	24.6126					1	2	1	1	2	2											8045	2	3065	2942.84	3	16090	3	6274	6274	2	21097.5	1	14172		2						25	0	0	18
737	1	31	22.2635					2	3	1	1	3	1	5000	3	1400	1400	2	10000	2	3120	3096.28	2											21097.5	4	6960	7192.12	3						25	1	1	15
738	1	24	21.0616	1	1	1	1	1	2	1	2	3	1	5000	4	1037	1042.14	1																21097.5	4	4720	4825.62	1	42195	2	10340	10302	1	75	1	1	65	174.167	173.127
739	1	27	25.2341					3	6	0	2	1	1	5000	3	1245	1245	2						8045	3	2110	2110	2																15	1	0	10
740	1	39	29.1622					2	3	1	2	1	1	5000	4	2054	2074.26	1											16090	3	6477	6477	1											34	1	0	30
741	1	37	25.9686	1	1	1	1	2	3	0	2	2	1	5000	4	1290	1297.96	1																21097.5	4	6180	6362.33	1	42195	4	13860	14049.2	1	55	1	1	40
742	1	27	21.8905					1	2	1	2	1	3	5000	3	1482	1482	2	10000	2	3405	3376.76	2											21097.5	4	7087	7327.82	1						25	0	0	18
743	1	47	21.9666	1	1	1	1	2	3	0	1	1	1																16090	4	4430	4602.08	2	21097.5	3	6401	6401	2	42195	3	13162	13162	2	55	0	1	43
744	1	45	27.5417					3	6	1	2	3	1	5000	2	1937	1855.8	2																21097.5	4	8170	8491.71	1						18.5	1	0	15
745	1	58	19.2003	1	1	1	1	2	3	1	2	3	1						10000	3	3484	3484	1											21097.5	2	8005	7904.24	1	42195	3	17421	17421	1	41	0	1	25	289.025	293.295
746	1	46	31.0724					2	3	1	2	1	2	5000	3	2163	2163	3	10000	3	4147	4147	2											21097.5	2	9257	9122.52	2						26	0	1	20
747	1	39	23.6772	1	1	1	1	2	3	0	2	1	1	5000	2	1290	1253.47	2																21097.5	3	5520	5520	2	42195	3	12813	12813	2	40	1	0	25
748	1	50	24.1355	1	1	1	1	1	1	0	2	3	3						10000	2	3480	3450.51	2											21097.5	3	8100	8100	2	42195	4	17040	17326.9	2	46	0	0	40	283.742	293.96
749	1	44	22.2038	1		1		2	3	1	2	2	1	5000	4	1330	1338.47	1	10000	3	3051	3051	2																42195	2	16209	16115.7	2	50	1	0	42
750	1	30	22.0195	1				2	3	0	1	1	1						10000	1	2880		2						16090	4	4500	4677.67	2						42195	4	14115	14311.3	2	40	0	0	30
751	1	42	24.3414	1				2	3	0	2	3	2						10000	2	2580	2563.76	2											21097.5	1	6000		2	42195	4	13200	13371.5	2	40	1	1	35	212.156
752	1	68	26.2741					3	6	0	2	2	1	5000	3	1441	1441	2																21097.5	3	6300	6300	2						40	1	0	20
753	1	36	19.7956					2	4	0	2	2	1	5000	4	1180	1186.66	1	10000	4	2490	2539.36	1											21097.5	4	5526	5671.33	1						57	1	1	45
754	1	29	22.9134					4	10	0	2	3	1	5000	3	1364	1364	1						8045	3	2340	2340	1																22	0	0	15
755	1	41	22.2635					1	2	0	2	2	2	5000	3	1616	1616	2	10000	2	3817	3781.55	2											21097.5	2	9198	9065.22	2						9	0	0	15
756	1	34	25.2319					3	7	0	2	2	3	5000	4	1405	1414.45	4						8045	3	2315	2315	4																30	0	0	30
757	1	46	21.2245	1		1		2	3	0	1	3	2	5000	4	1009	1013.87	1											16090	4	3445	3548.17	1						42195	2	10176	10139.2	2	55	1	1	45	177.111	176.223
758	1	31	21.9666					2	3	0	2	3	1	5000	3	1150	1150	2	10000	2	2494	2478.82	2						16090	3	4151	4151	2											46	1	1	40
759	1	26	23.2778	1	1			2	4	0	2	3	1																					21097.5	2	4615	4581.33	1	42195	2	9904	9869.1	1	76	1	1	65	166.557
760	1	34	21.3859	1	1	1	1	2	4	0	2	3	2						10000	3	2716	2716	2											21097.5	3	5439	5439	3	42195	3	13480	13480	2	50	0	0	40	201.679	204.442
761	1	29	27.4583					3	6	0	1	1	1	5000	3	1250	1250	2	10000	4	2643	2698.68	2	8045	4	2110	2199.41	2																15	1	0	12
762	1	35	25.5416					2	4	1	2	3	1	5000	4	1620	1632.58	1																21097.5	4	8387	8726.38	3						20	0	0	15
763	1	43	24.5511					1	1	1	2	1	1	5000	3	1880	1880	2																21097.5	3	9000	9000	1						33	0	0	20
764	1	29	28.3521					2	5	0	2	2	3	5000	4	1446	1456.01	2																21097.5	4	7932	8234.89	2						25	0	0	20
765	1	41	27.9035					2	5	0	2	3	3						10000	3	2995	2995	2											21097.5	2	6727	6655.7	2						30	0	1	25
766	1	55	19.6603					1	2	1	2	1	2						10000	2	2850	2830.19	2											21097.5	3	6272	6272	2						60	0	1	55
767	1	33	21.9293					3	6	0	2	2	1	5000	4	1236	1243.31	2											16090	3	4660	4660	2											35	1	1	20
768	1	31	21.2498	1				2	3	0	1	1	3	5000	2	1007	984.603	3																					42195	2	11175	11130.6	4	30	0	1	20
769	1	28	22.7036					1	2	1	1	2	1											8045	2	2580	2492.89	1						21097.5	3	6840	6840	2						10	0	1	8
770	1	29	23.1481					2	5	0	1	2	1	5000	4	1150	1156.32	2	10000	2	2655	2637.8	3																					45	0	1	35
771	1	51	25.9686	1				2	3	0	2	2	2											8045	3	2099	2099	2											42195	2	13617	13551.1	2	53	0	0	45
772	1	18	21.1535					2	3	0	1	3	1	5000	3	1007	1007	1						8045	3	1722	1722	2	16090	2	3732	3644.86	2											75	1	1	65
773	1	21	23.9194					2	3	0	2	1	1	5000	3	1051	1051	2	10000	2	2200	2188.18	2											21097.5	3	4780	4780	3						70	1	1	30
774	1	28	19.8657					2	5	1	2	2	1	5000	4	1625	1637.66	1											16090	4	5516	5785.36	1											16	0	0	13
775	1	51	23.906					1	2	0	1	3	1	5000	3	1480	1480	2																21097.5	2	7380	7294.27	2						40	0	0	30
776	1	32	29.3878	1				1	2	0	2	1	1											8045	2	2657	2564.71	2											42195	4	15077	15301.2	1	45	0	1	30
777	1	37	36.7565	1		1		1	1	0	2	2	1	5000	2	2182	2079.5	4	10000	3	4183	4183	3																42195	3	21046	21046	3	22	0	0	12
778	1	30	23.5923					2	3	0	1	3	3	5000	4	1281	1288.85	1																21097.5	4	6221	6405.79	2						30	1	1	25
779	1	31	23.0834	1	1			2	3	1	1	3	1																					21097.5	3	7500	7500	4	42195	3	15070	15070	2	40	0	1	22	278.211
780	1	56	28.6596					1	2	0	2	2	1	5000	3	1920	1920	3	10000	3	4200	4200	3																					15	1	0	10
781	1	33	24.2424					1	2	1	2	2	1	5000	1	2709		3	10000	3	5257	5257	2	8045	4	4021	4358.66	2																4.5	0	0	8
782	1	54	21.3859	1	1	1	1	1	2	0	1	1	1	5000	4	1620	1632.58	2																21097.5	4	8040	8351.36	2	42195	4	18900	19253.6	2	32	0	0	25
783	1	50	26.7324	1				2	3	0	2	3	2											8045	2	2194	2130.69	2											42195	4	13444	13621.9	2	65	1	1	50	214.761
784	1	50	22.1661					1	1	0	2	1	1	5000	2	1322	1283.67	2																21097.5	3	5886	5886	1						44	1	1	35
785	1	51	24.4318					2	3	0	2	1	1						10000	3	2565	2565	3											21097.5	3	5481	5481	2						40	0	1	30
786	1	30	28.6456					2	3	0	2	3	1	5000	3	1530	1530	1						8045	3	3000	3000	1																3.5	0	0	12
787	1	33	21.0616	1	1	1	1	2	5	1	2	2	1						10000	4	2545	2596.59	1											21097.5	3	6168	6168	2	42195	3	12481	12481	1	50	1	1	40
788	1	42	23.0057					2	4	1	2	2	3	5000	3	1274	1274	2	10000	2	2548	2532.16	2											21097.5	2	5798	5744.96	2						28	1	1	20
789	1	38	22.3776					2	4	0	2	2	1	5000	3	1114	1114	3											16090	3	3520	3520	1											50	0	1	40
790	1	45	25.8137	1				1	2	0	2	3	1	5000	2	1412	1368.36	2																					42195	4	12749	12908.9	1	63	1	1	48	228.095
791	1	37	18.992					2	4	0	2	3	1	5000	2	1220	1187.28	2											16090	4	4050	4193.35	1											36	0	0	30
792	1	45	23.4508	1	1			2	5	0	1	3	1																					21097.5	2	4864	4826.61	2	42195	4	10963	11081	3	65	1	1	50	178.457
793	1	34	26.4234	1	1	1	1	2	3	0	2	3	2	5000	4	1067	1072.44	1																21097.5	2	5190	5147.46	1	42195	3	11790	11790	1	68	1	1	50	188.787	186.632
794	1	56	22.4119	1	1	1	1	3	6	0	2	2	1						10000	2	2345	2331.57	1											21097.5	4	5037	5157.46	1	42195	3	10906	10906	1	80	1	1	65
795	1	37	25.922	1				1	1	1	2	2	3	5000	4	2160	2182.42	2																					42195	3	17281	17281	2	40	0	0	30
796	1	35	23.883					2	4	0	2	1	1	5000	4	1110	1115.89	2											16090	3	4100	4100	2	21097.5	4	5066	5187.87	1						40	1	1	30
797	1	58	18.8739					2	5	1	2	1	1						10000	3	3120	3120	2											21097.5	2	8400	8289.12	2						27	0	0	25
798	1	40	28.1329	1	1	1	1	3	6	0	2	3	1						10000	3	3000	3000	4											21097.5	2	6271	6208.99	1	42195	3	14355	14355	2	70	1	1	55	219.584	228.32
799	1	64	21.2038	1	1			1	1	1	2	2	1																					21097.5	2	6480	6413.81	2	42195	2	15000	14920.1	2	17	0	0	30
800	1	48	25.922					1	1	1	1	3	1	5000	3	1894	1894	3																21097.5	2	8100	7996.85	2						30	1	0	25
801	1	45	22.3776					2	4	1	2	2	1	5000	3	1773	1773	3																21097.5	2	8005	7904.24	3						31	0	0	22
802	1	49	26.6125	1	1			3	8	0	2	1	1																					21097.5	4	6360	6553.27	1	42195	2	15587	15500.7	1	51	1	1	30
803	1	31	24.209					2	3	1	2	2	1	5000	3	1680	1680	3	10000	3	3780	3780	3																					14.9	1	1	13.7
804	1	24	21.5169	1	1	1	1	1	1	1	2	2	1	5000	3	1303	1303	3																21097.5	2	6060	6002.08	2	42195	3	12830	12830	2	50	0	0	40
805	1	28	23.7477					2	3	1	2	2	1	5000	4	1793	1808.42	3	10000	3	3774	3774	2																					13	0	0	10
806	1	55	26.6554	1	1			2	3	0	1	3	3																					21097.5	2	7115	7035.29	3	42195	2	16410	16314.4	3	41	0	0	35	254.955
807	1	35	31.5657	1				1	1	0	2	1	3																16090	4	5220	5460.59	1						42195	2	16500	16403.4	2	65	1	1	40
808	1	37	25.6818	1				1	2	0	2	2	3						10000	1	3900		2	8045	2	3401	3251.24	2											42195	4	20100	20500.4	2	35	0	1	30
809	1	32	23.6772	1	1	1	1	2	5	0	1	2	1	5000	3	1198	1198	2																21097.5	3	5838	5838	2	42195	4	13162	13332.5	3	46	1	0	33
810	1	36	20.8699					2	5	1	2	2	2	5000	2	1642	1583.28	3																21097.5	2	7523	7433.94	2						24	1	1	22
811	1	41	30.2715					1	1	1	2	1	1	5000	4	2083	2103.84	3	10000	2	4814	4757.75	4											21097.5	3	10049	10049	3						20	0	0	15
812	1	30	22.6817	1	1			2	3	1	2	1	1																					21097.5	3	5600	5600	1	42195	3	12753	12753	1	51	1	1	40
813	1	40	24.9351	1	1	1	1	1	2	0	2	2	1																16090	2	4569	4439.07	2	21097.5	3	6173	6173	2	42195	3	13405	13405	2	65	0	1	55
814	1	33	26.3749	1	1	1	1	2	4	0	2	3	1																16090	4	4553	4734.97	1	21097.5	4	6346	6538.41	1	42195	2	14822	14744	1	45	0	0	35	239.308	236.569
815	1	35	30.1237					1	2	0	2	3	1	5000	4	1934	1951.96	2	10000	2	4206	4163	2											21097.5	3	9034	9034	1						25	0	0	15
816	1	26	25.8586	1	1			1	2	0	1	2	2						10000	5	3182		2											21097.5	2	7864	7766.74	3	42195	2	16506	16409.3	3	45	1	1	25
817	1	42	23.4287					2	4	0	1	3	1						10000	2	2552	2536.11	2											21097.5	4	6601	6809.44	3						10	0	0	6
818	1	35	20.9276					2	5	0	2	3	1											8045	3	2166	2166	2						21097.5	3	5490	5490	2	42195	5	10805		1	55	1	1	43		204.587
819	1	49	22.6817	1	1	1	1	1	2	1	2	1	2	5000	4	1764	1778.93	2																21097.5	2	8403	8292.04	2	42195	3	18420	18420	2	33	0	1	22
820	1	57	22.5497					2	4	1	2	1	1	5000	3	1400	1400	1						8045	2	2910	2799.66	2						21097.5	1	7460		2						28	1	1	15
821	1	42	24.5511					1	2	0	2	2	1	5000	2	1443	1397.45	3	10000	4	2578	2630.95	2																42195	1	15691		2	40	0	1	30
822	1	34	28.9471					1	1	1	2	1	1	5000	3	2063	2063	3						8045	2	3338	3193.62	3																15	0	0	15
823	1	40	23.8048					1	2	0	2	1	2	5000	4	1356	1364.8	1	10000	4	2856	2921.13	1											21097.5	3	6395	6395	1						30	1	0	20
824	1	47	24.9719					1	2	0	2	1	1	5000	2	1331	1292.15	2	10000	2	2997	2975.1	2																42195	1	13950		1	52	1	1	40
825	1	26	26.6554					3	6	0	2	2	1	5000	2	2400	2276.58	4						8045	3	3000	3000	2						21097.5	3	7680	7680	2						20	0	0	18
826	1	31	22.5779					2	3	0	2	1	1	5000	3	1240	1240	1	10000	2	2598	2581.53	1											21097.5	2	6192	6131.54	2						11	0	1	8
827	1	56	21.3859					1	2	1	2	2	1						10000	3	4440	4440	3	8045	3	3720	3720	2	16090	3	6966	6966	2											35	0	0	30
828	1	34	21.1727	1	1	1	1	1	2	0	1	2	2	5000	4	1092	1097.7	3																21097.5	2	4724	4688.73	1	42195	3	10530	10530	2	72	1	1	65
829	1	47	21.3904	1	1	1	1	2	3	1	2	3	1																16090	3	4920	4920	2	21097.5	3	6300	6300	1	42195	2	15000	14920.1	1	40	1	1	35	231.689	238.661
830	1	27	27.5244	1				2	5	0	1	1	2						10000	3	2484	2484	3																42195	4	12426	12577.9	3	45	0	1	33
831	1	25	22.3621					3	7	0	2	3	1	5000	3	1020	1020	2	10000	3	2180	2180	3											21097.5	3	4740	4740	1						70	1	1	60
832	1	35	25.2475	1	1	1	1	2	4	1	2	1	3						10000	2	2778	2759.18	2											21097.5	2	6013	5955.97	2	42195	3	13079	13079	2	52	1	1	37
833	1	46	23.8496	1	1	1	1	2	4	0	2	2	1																16090	3	4199	4199	1	21097.5	3	5639	5639	1	42195	2	11913	11862.5	1	50	0	1	30
834	1	46	21.2245					3	6	0	2	3	3	5000	4	1257	1264.56	2	10000	3	2730	2730	2																					35	1	1	30
835	1	29	21.3859					1	2	0	2	2	1											8045	4	1540	1587.09	1						21097.5	4	4234	4318.79	1						83	1	1	80
836	1	28	24.5511					2	3	0	2	1	2	5000	3	1380	1380	1	10000	2	3000	2978.06	1																					30	0	0	25
837	1	27	25.9689					2	3	0	2	2	2	5000	3	1792	1792	3						8045	4	3200	3410.24	3																20	0	0	15
838	1	23	20.4467					2	4	1	2	1	3	5000	2	1530	1478.89	2																21097.5	2	7389	7303.07	4						9	0	0	25
839	1	33	32.9686					2	4	0	2	3	3	5000	4	2372	2399.07	2	10000	2	5220	5153.93	1																					12	0	1	6
840	1	39	23.883					2	3	0	2	3	1						10000	4	2754	2814.51	2	8045	2	2174	2111.82	2																20	1	0	15
841	1	55	24.0421	1	1	1	1	1	2	0	2	2	1						10000	3	2560	2560	1											21097.5	3	5616	5616	1	42195	3	12741	12741	1	70	1	1	50
842	1	38	24.8506	1	1	1	1	2	3	1	2	2	2						10000	3	2835	2835	3											21097.5	3	6285	6285	2	42195	4	13210	13381.8	1	65	0	0	50
843	1	16	19.4767					2	3	0	2	2	1	5000	3	985	985	1	10000	4	2055	2088.51	1											21097.5	3	5125	5125	3						50	1	1	45
844	1	45	26.4417					2	4	0	2	3	1	5000	3	1629	1629	3	10000	3	3277	3277	3																					6	0	0	6
845	1	60	32.4074	1	1	1	1	2	3	0	2	1	1	5000	4	2040	2059.99	2																21097.5	3	7505	7505	1	42195	3	18730	18730	1	50	0	0	35
846	1	36	23.4541	1	1			1	1	1	1	1	2																					21097.5	3	7760	7760	2	42195	3	17077	17077	2	30	0	0	20
847	1	53	21.7047	1	1	1	1	1	1	1	2	2	1						10000	2	3060	3037.18	2											21097.5	2	7380	7294.27	2	42195	3	16500	16500	2	50	1	1	40
848	1	43	22.6817					2	3	1	2	2	2	5000	2	1794	1724.13	2	10000	2	3780	3745.23	2											21097.5	4	8640	9000.61	1						18	1	0	24
849	1	32	24.6465	1	1	1	1	1	2	1	2	3	1																16090	4	5609	5887.75	1	21097.5	3	7606	7606	1	42195	4	17149	17439.6	2	40	0	1	35	272.552	286.592
850	1	45	20.9276					2	3	1	2	2	3	5000	3	1590	1590	3	10000	2	3060	3037.18	1											21097.5	3	7470	7470	3						46	0	1	45
851	1	53	20.7749					2	3	0	2	1	1	5000	3	1396	1396	1											16090	4	4773	4973.36	1											50	1	1	45
852	1	33	22.6817					2	3	1	2	2	1	5000	3	1650	1650	3																21097.5	2	7800	7704.3	2						25	0	0	20
853	1	27	21.8612					2	4	1	1	3	2	5000	1	1569		4	10000	2	3261	3235.09	3											21097.5	4	7080	7320.33	4						25	0	0	20
854	1	37	26.8345					2	3	1	2	1	1	5000	4	2354	2380.65	3	10000	4	4380	4535.07	3																					20	0	0	17
855	1	33	24.209					2	3	1	2	3	2						10000	3	4140	4140	3											21097.5	4	9063	9460.6	2						19	0	0	9
856	1	25	24.3071					1	2	0	1	2	1	5000	4	1052	1057.29	3	10000	4	2308	2350.35	3											21097.5	1	4944		1						85	0	1	60
857	1	32	23.83	1	1			2	3	1	2	3	3																					21097.5	2	6592	6523.52	2	42195	3	14379	14379	2	28	1	1	23	245.255
858	1	51	26.5677	1	1	1	1	2	3	0	2	3	1						10000	3	2890	2890	1											21097.5	3	6727	6727	1	42195	3	14745	14745	1	43	0	0	29	248.626	247.233
859	1	41	24.543	1	1	1	1	2	3	0	1	1	1	5000	4	1005	1009.83	1																21097.5	3	4620	4620	1	42195	3	9960	9960	1	100	1	1	80
860	1	49	20.8996	1	1			1	2	1	2	3	2																					21097.5	3	5840	5840	2	42195	3	12363	12363	2	67	1	0	45	212.57
861	1	55	24.3787	1	1	1	1	3	6	0	2	1	2											8045	2	2040	1985.15	2						21097.5	4	5520	5665.01	2	42195	3	12180	12180	2	33	0	1	30
862	1	31	19.5312					2	3	1	2	3	2	5000	2	1410	1366.48	2																21097.5	3	6659	6659	2						22	1	0	22
863	1	36	20.0351					2	5	1	2	2	1						10000	4	2880	2946.24	1											21097.5	3	6300	6300	2						9	0	0	20
864	1	34	24.2376	1	1	1	1	1	2	0	2	2	2						10000	3	3430	3430	4											21097.5	3	8231	8231	4	42195	4	15610	15850.4	1	44	0	1	52
865	1	33	24.3044					3	8	0	1	2	1						10000	2	2431	2416.57	1						16090	3	3977	3977	1	21097.5	3	5587	5587	2						19	1	1	16
866	1	47	21.3859	1				2	5	0	2	2	2	5000	4	1002	1006.8	1																					42195	3	9827	9827	1	60	1	1	50
867	1	46	24.6914	1				3	6	0	2	1	3	5000	3	1480	1480	2																					42195	3	17820	17820	2	40	0	0	30
868	1	23	23.9702					2	3	1	2	3	1	5000	3	1393	1393	3																21097.5	4	6840	7064.06	2						35	1	0	25
869	1	35	27.3569					1	1	0	2	1	1	5000	4	1540	1551.36	2	10000	4	3482	3579.3	2											21097.5	2	8100	7996.85	2						12	0	0	20
870	1	29	26.5622					1	2	0	2	3	1											8045	4	2892	3062.64	3						21097.5	4	8073	8386.97	3						15	0	0	12
871	1	55	21.3522					3	7	0	1	1	1	5000	3	1168	1168	2	10000	3	2496	2496	3											21097.5	4	5377	5514.5	2						45	1	1	40
872	1	57	20.7741					1	1	1	1	2	1	5000	3	1740	1740	3	10000	4	3660	3767.65	2											21097.5	2	8220	8113.79	2						38	1	1	33
873	1	26	23.3742	1		1		1	2	0	2	2	1						10000	4	2920	2988.12	2						16090	4	5100	5329.42	3						42195	4	14820	15036.5	2	30	0	0	25
874	1	43	23.0662	1				1	2	0	1	3	1	5000	2	1147	1118.03	1																					42195	3	13105	13105	2	73	0	1	50	191.028
875	1	25	22.8059					1	2	1	1	2	1	5000	3	1680	1680	2																21097.5	2	7980	7879.86	2						25	0	1	20
876	1	26	21.9666	1	1			1	1	0	2	3	1																					21097.5	2	5040	4999.87	2	42195	3	11160	11160	2	40	1	0	30	190.461
877	1	56	26.5051					2	3	0	2	1	1						10000	3	2889	2889	1	8045	4	1277	1309.21	1						21097.5	3	6751	6751	2						40	0	1	30
878	1	46	26.2661					1	1	0	2	2	2											8045	2	2353	2280.33	2						21097.5	2	7311	7226.86	2						20	0	0	12
879	1	32	29.1622					2	3	0	1	1	1	5000	2	1380	1338.28	2	10000	2	3248	3222.3	2	8045	2	2400	2324.45	2																10	0	0	35
880	1	42	17.8725					1	2	0	2	2	2						10000	2	2412	2397.8	2											21097.5	4	5284	5416.72	2						30	0	0	30
881	1	28	23.4541	1	1			2	3	1	2	2	1																					21097.5	3	6120	6120	1	42195	4	13396	13572.7	2	50	0	0	40
882	1	48	20.2515	1				2	4	1	2	1	1	5000	2	1560	1506.9	2																21097.5	1	7620		2	42195	3	15840	15840	1	45	1	1	30
883	1	45	21.6407					2	3	0	2	3	2	5000	3	1142	1142	2	10000	3	2519	2519	3																					25	1	1	20
884	1	34	25.7943					2	4	0	2	3	1	5000	3	1487	1487	2						8045	2	2598	2509.69	2											42195	1	16809		2	44	0	1	25		283.137
885	1	23	23.5923					3	7	0	2	2	1	5000	4	992	996.703	1	10000	4	2142	2178.43	2																					70	1	1	55
886	1	53	22.6817	1				2	4	0	2	2	1						10000	2	2482	2466.96	2																42195	3	11507	11507	2	64	0	1	50
887	1	38	23.7477					3	6	0	1	2	1	5000	3	1609	1609	2	10000	3	3362	3362	2																					12	1	0	7
888	1	45	23.219	1	1	1	1	1	1	0	2	2	1	5000	3	1175	1175	3																21097.5	2	5298	5253.67	2	42195	4	11470	11599.3	2	50	0	0	45
889	1	67	25.0216					1	2	0	1	3	1	5000	4	1375	1384.05	3																21097.5	3	6372	6372	2						36	1	1	33
890	1	40	23.6101	1		1		1	1	0	2	2	1	5000	2	1036	1012.31	1	10000	4	2157	2193.94	1																42195	4	10627	10737.9	1	85	1	1	75
891	1	43	33.67					2	3	0	2	3	1	5000	3	1800	1800	2											16090	2	5700	5499.2	3	21097.5	3	7260	7260	3						23	1	1	15
892	1	59	23.2419	1	1	1	1	2	3	0	2	2	1	5000	2	1390	1347.69	2																21097.5	2	6735	6663.53	2	42195	3	14785	14785	1	56	1	1	45
893	1	43	25.4359					2	3	1	2	1	1	5000	4	1623	1635.63	2						8045	3	2833	2833	2																30	1	0	25
894	1	43	23.0834					2	3	0	1	3	2	5000	2	1723	1658.45	2	10000	2	4323	4277.59	4	8045	3	3313	3313	3																26	0	0	22
895	1	24	21.9886	1		1		2	3	1	1	3	1						10000	4	3202	3284.09	2						16090	4	5288	5535.05	2						42195	4	15284	15514.4	2	20	0	0	15	279.744	284.658
896	1	31	25.954					2	3	1	2	2	1	5000	3	1455	1455	2																21097.5	2	7575	7484.71	2						35	0	1	24
897	1	25	28.7598					2	4	0	2	3	1	5000	4	1320	1328.34	2	10000	1	3720		1											21097.5	3	7109	7109	2						20	0	0	12
898	1	48	21.8716					2	5	0	2	2	1	5000	2	1281	1244.98	2	10000	2	2904	2883.44	2											21097.5	2	6498	6431.45	2						11	1	1	25
899	1	57	27.3569					1	2	0	2	1	1	5000	3	1620	1620	3	10000	4	3540	3640.61	3																					25	0	0	10
900	1	46	25.0505	1	1			1	1	1	2	2	1	5000	1	1485		2																21097.5	4	6420	6616.99	2	42195	4	13720	13905.4	2	55	1	1	50
901	1	37	19.9216					2	3	0	2	1	3	5000	3	1762	1762	2	10000	2	4225	4181.61	2											21097.5	3	9792	9792	2						30	0	0	20
902	1	55	21.3068	1	1	1	1	3	7	1	1	1	2	5000	3	1323	1323	2																21097.5	4	6095	6272.28	2	42195	2	13506	13441.2	2	54	1	1	48
903	1	28	22.7064					2	5	1	2	1	2	5000	3	1860	1860	3	10000	4	3300	3387.26	2																					23	0	0	15
904	1	32	20.312					1	1	1	2	3	1						10000	2	3300	3273.47	2											21097.5	3	7023	7023	2						21	1	1	14
905	1	33	22.6817	1				2	3	1	2	3	3											8045	3	3433	3433	2											42195	2	19307	19174.8	2	32	1	0	25	342.318
906	1	26	25.3777					1	2	1	2	2	1	5000	3	1398	1398	2	10000	2	2833	2813.43	1																					20	1	1	18
907	1	32	21.4844					1	1	1	2	3	1	5000	3	1984	1984	4	10000	2	3937	3899.3	3											21097.5	3	8590	8590	3						20	0	0	10
908	1	31	20.0351	1	1	1	1	1	1	0	2	1	1																16090	2	3468	3392.63	2	21097.5	3	4565	4565	2	42195	3	9414	9414	1	110	1	1	85
909	1	40	27.1515	1	1	1	1	1	2	0	2	2	1	5000	2	1546	1493.83	2																21097.5	3	7603	7603	1	42195	2	17623	17512.8	4	21	1	1	60
910	1	36	23.6772	1		1		2	3	0	1	3	1	5000	4	1279	1286.83	3	10000	3	2789	2789	2																42195	3	14712	14712	3	20.6	1	1	13	239.458	249.51
911	1	49	36.4606					2	3	0	2	1	1	5000	3	2055	2055	2																21097.5	3	9000	9000	2						10	0	0	25
912	1	38	20.6308	1		1		2	3	0	2	2	1	5000	2	1209	1176.86	1	10000	3	2591	2591	1																42195	3	13142	13142	1	52	1	1	45
913	1	40	17.2136					2	3	1	2	2	1	5000	2	1382	1340.16	1						8045	3	2223	2223	2						21097.5	2	6390	6325.63	2						35	1	0	30
914	1	49	23.6606					1	2	0	2	3	1						10000	2	2581	2564.74	2											21097.5	3	5708	5708	3	42195	1	13925		2	45	0	1	30		211.665
915	1	27	34.3702					1	1	0	2	3	1	5000	4	1788	1803.34	1											16090	2	7114	6803.92	1						42195	1	23206		2	35	1	0	25		342.148
916	1	32	24.1398					1	1	1	2	1	1						10000	2	4402	4354.92	3						16090	4	6466	6839.27	2	21097.5	3	8826	8826	2						35	1	1	30
917	1	38	20.7792					2	3	1	2	1	1	5000	4	1540	1551.36	2																21097.5	3	7920	7920	2						15	0	1	12
918	1	41	23.7926	1	1	1	1	2	5	0	2	2	1	5000	3	1160	1160	4																21097.5	4	4630	4731.59	1	42195	4	9801	9895.24	2	80	1	1	60
919	1	47	23.4918	1	1			2	5	0	2	3	1																					21097.5	4	5061	5182.63	1	42195	4	10588	10698.1	1	55	0	1	45	191.571
920	1	49	26.2741	1				2	3	0	2	2	1	5000	3	1235	1235	2																					42195	4	12516	12670.1	2	44	0	1	36
921	1	30	20.6308					2	3	0	2	2	1	5000	3	1410	1410	2						8045	3	2700	2700	2						21097.5	4	7260	7512.93	2						27	0	0	17
922	1	27	20.6563	1				1	2	1	2	3	1	5000	4	1169	1175.54	1																					42195	3	12545	12545	1	40	0	0	30	207.059
923	1	45	25.9686	1				2	3	0	2	3	1						10000	2	3390	3362.01	4																42195	3	13973	13973	1	30	0	0	45	262.075
924	1	35	22.5394					2	4	0	1	1	3	5000	3	1502	1502	2						8045	2	2542	2457.4	3						21097.5	2	6768	6695.83	2						27	1	0	20
925	1	36	20.0351	1	1	1	1	2	3	1	2	3	2	5000	3	1407	1407	2																21097.5	2	6433	6367.77	1	42195	2	15722	15634.2	1	60	1	1	55	224.28	231.303
926	1	37	18.2464					1	1	1	2	3	2	5000	3	1104	1104	2	10000	4	2267	2307.84	1											21097.5	2	5034	4993.97	2						40	1	1	35
927	1	21	19.4767					3	7	0	2	3	2	5000	4	1079	1084.57	2																21097.5	4	5479	5621.83	2						16	1	1	40
928	1	45	30.7068					2	5	0	2	1	1	5000	3	1770	1770	4						8045	2	2891	2782.07	3																10	0	0	5
929	1	39	24.441	1	1	1	1	2	3	0	1	1	2						10000	3	2642	2642	1											21097.5	3	5916	5916	1	42195	3	13565	13565	1	33	1	1	25
930	1	44	22.9048					2	5	1	2	3	2	5000	3	1664	1664	2	10000	2	3537	3506.54	2											21097.5	3	8643	8643	2						22	0	0	20
931	1	55	24.1302					3	6	0	2	3	1	5000	3	1290	1290	2						8045	3	2250	2250	2																36	1	1	32
932	1	39	30.4903					1	1	1	2	3	2	5000	3	1986	1986	3	10000	3	4083	4083	3											21097.5	2	9825	9673.65	2						25	0	0	20
933	1	66	23.2939					2	3	0	2	1	1	5000	3	2045	2045	2																21097.5	2	10270	10104.7	2						25	0	1	25
934	1	27	22.5183	1				2	3	0	2	1	2																16090	2	3930	3833.49	3						42195	4	10846	10961.5	1	61	1	1	50
935	1	47	25.922	1	1			2	3	0	2	3	1																					21097.5	4	5227	5356.84	2	42195	2	14045	13974.9	2	65	0	1	55	193.71
936	1	26	24.4898					1	2	1	1	3	1						10000	2	3525	3494.75	2											21097.5	3	8146	8146	3						25	1	0	20
937	1	33	22.8676	1	1	1	1	2	4	0	2	3	1	5000	3	1423	1423	2																21097.5	2	6615	6546.04	1	42195	2	15294	15210.9	1	43	1	0	35	239.551	242.02
938	1	58	21.3522					2	3	0	2	3	1						10000	4	2144	2180.5	1						16090	4	3720	3840.59	2						42195	5	10396		1	83	1	0	70		179.431
939	1	31	22.0195					2	3	1	2	1	3	5000	3	1620	1620	2																21097.5	2	7440	7352.88	2						14	0	0	10
940	1	31	26.936	1	1	1	1	2	3	1	1	3	1						10000	4	2780	2841.67	3											21097.5	3	5970	5970	3	42195	3	14109	14109	3	45	0	1	30	223.275	224.219
941	1	46	21.0438	1				1	2	0	2	2	1						10000	4	2396	2441.67	2																42195	2	11492	11445	1	60	1	1	50
942	1	32	25.0438					2	4	1	2	2	1	5000	2	1657	1597.22	3	10000	3	3420	3420	3																					15	1	0	10
943	1	35	20.5857					2	3	0	1	2	1	5000	4	1455	1465.14	2											16090	4	5069	5295.57	2	21097.5	4	7061	7300.02	2						17	0	0	15
944	1	28	22.3577					2	3	1	2	2	3	5000	4	1144	1150.26	2																21097.5	4	5219	5348.44	2						50	1	1	45
945	1	33	19.4415					1	2	0	2	1	1	5000	4	930	934.132	2																21097.5	4	4350	4439.55	2						75	1	1	60
946	1	48	26.1092					2	3	1	2	1	2	5000	3	1862	1862	3																21097.5	2	8040	7938.36	2						30	1	1	25
947	1	42	29.0909	1	1	1	1	2	3	0	2	1	1						10000	3	2674	2674	3											21097.5	3	6607	6607	3	42195	2	12613	12556.5	3	25	0	0	15
948	1	49	24.4898	1				1	1	0	2	2	1						10000	3	3180	3180	2																42195	3	13080	13080	2	100	0	0	75
949	1	25	23.0662					2	3	1	2	2	2	5000	3	1778	1778	3																21097.5	3	7920	7920	2						24	0	0	20
950	1	31	22.2635	1	1	1	1	2	4	0	2	3	2	5000	4	1108	1113.87	2																21097.5	4	4995	5113.44	2	42195	3	11090	11090	1	70	1	1	55	186.104	185.438
951	1	40	25.2475	1	1	1	1	2	5	0	2	3	3						10000	2	2795	2775.95	2											21097.5	3	6435	6435	1	42195	2	15600	15513.6	2	60	1	1	27	240.154	237.179
952	1	48	25.8137	1	1			1	1	0	2	2	2																					21097.5	3	6014	6014	2	42195	3	13835	13835	2	56	1	1	45
953	1	25	23.1481					2	3	0	2	1	1	5000	4	1049	1054.26	2	10000	4	2159	2196.01	2											21097.5	3	4890	4890	2						40	0	1	35
954	1	36	20.0351					2	3	1	2	2	1	5000	3	1591	1591	2						8045	2	2599	2510.63	2																12	1	0	10
955	1	61	25.954					2	3	0	2	3	1											8045	3	2685	2685	2	16090	2	5355	5177.39	2											22	1	0	16
956	1	30	21.3859	1	1			2	3	1	2	2	1																					21097.5	2	8296	8187.83	2	42195	4	17970	18289.4	2	25	0	0	20
957	1	67	28.0584	1	1	1	1	1	2	0	2	3	1						10000	3	4500	4500	2											21097.5	3	9600	9600	2	42195	2	21600	21434.7	4	40	0	1	30	336.136	359.334
958	1	33	21.6407	1	1	1	1	3	6	1	1	1	1	5000	3	1333	1333	2																21097.5	3	6254	6254	2	42195	2	14043	13972.9	2	35	1	1	28
959	1	36	27.4857					2	5	1	2	2	1	5000	3	1680	1680	2	10000	3	3300	3300	2						16090	3	5700	5700	2											8	0	0	18
960	1	35	20.3166	1	1			1	2	0	2	3	3																					21097.5	4	4631	4732.63	2	42195	3	10424	10424	2	63	1	1	55	174.006
961	1	41	23.6151					1	2	1	2	2	3						10000	2	3983	3944.42	2	8045	3	2403	2403	2																30	1	0	25
962	1	42	24.0445	1				1	2	0	2	1	1						10000	4	2885	2951.47	3											21097.5	1	6084		1	42195	3	13680	13680	2	100	0	1	50
963	1	51	32.3615	1	1	1	1	1	1	1	2	1	2	5000	4	2088	2108.94	2																21097.5	3	9906	9906	2	42195	3	22333	22333	1	42	0	0	22
964	1	37	23.883	1	1	1	1	2	3	0	1	1	1											8045	2	1939	1889.38	1						21097.5	4	5613	5763	1	42195	3	11987	11987	2	40	1	1	35
965	1	34	21.9666					1	2	0	1	1	1						10000	4	2914	2981.83	2											21097.5	4	6782	7002.21	2						30	0	1	27
966	1	41	23.2727					2	5	0	2	3	2	5000	4	1380	1389.12	2	10000	3	2820	2820	2																					12	1	1	10
967	1	38	24.8237					2	3	1	2	3	1	5000	3	1789	1789	3	10000	3	3558	3558	3											21097.5	3	8340	8340	3						19	0	0	12
968	1	52	23.6538					2	3	0	2	2	2	5000	4	1310	1318.21	2	10000	4	2626	2680.96	2						16090	2	4554	4424.91	1											30	1	1	25
969	1	29	24.858					3	6	1	2	1	2	5000	3	1594	1594	3	10000	3	3720	3720	3											21097.5	2	8280	8172.24	4						18	0	0	15
970	1	50	22.5183					2	3	0	2	1	1	5000	4	1218	1225.1	2						8045	2	2099	2040.98	2	16090	4	4163	4314.61	2											51	1	0	45
971	1	33	18.3238	1	1			2	3	1	2	3	1																					21097.5	3	5660	5660	2	42195	4	11966	12106.8	2	50	0	0	40	208.858
972	1	26	22.0195					2	3	0	1	2	1	5000	2	1169	1138.93	2	10000	3	2440	2440	1											21097.5	3	6000	6000	2						30	1	1	20
973	1	25	21.5213	1	1	1	1	1	2	0	1	3	1	5000	4	1109	1114.88	2																21097.5	3	5517	5517	1	42195	2	12300	12246.2	2	70	1	1	50	200.481	199.332
974	1	54	21.8716	1	1			1	2	1	2	2	1																					21097.5	2	6794	6721.28	2	42195	4	14306	14507.7	1	51	1	1	40
975	1	34	25.7457	1	1	1	1	1	1	0	2	1	1	5000	4	1210	1217	1																21097.5	4	5947	6115.65	1	42195	4	13185	13356.1	1	45	0	0	45
976	1	39	22.3621	1	1	1	1	2	4	0	1	1	1						10000	3	2346	2346	1											21097.5	3	5187	5187	1	42195	3	10922	10922	1	54	0	0	40
977	1	32	31.4564					1	2	1	2	3	1	5000	2	2244	2135.74	1	10000	2	3913	3875.76	1																					20	0	0	15
978	1	34	24.1477					2	5	1	2	3	2	5000	3	2010	2010	3	10000	2	3750	3715.78	1																					13	1	0	10
979	1	45	20.3269					2	3	1	2	1	2	5000	4	1495	1505.71	1											16090	3	5307	5307	1	21097.5	3	7025	7025	1						42	1	1	30
980	1	32	22.7273	1	1			2	3	1	2	3	1																					21097.5	3	7440	7440	2	42195	4	14700	14913	2	55	1	1	40	264.246
981	1	45	21.9798	1				1	1	0	2	3	2	5000	3	1130	1130	2																					42195	4	11017	11136.2	1	70	0	1	50	192.803
982	1	34	23.5923	1	1			2	3	1	2	2	2																					21097.5	3	6722	6722	2	42195	3	16151	16151	2	30	0	1	18
983	1	37	24.1302	1	1	1	1	2	3	0	2	1	1																16090	4	4482	4658.23	2	21097.5	3	6509	6509	2	42195	3	14096	14096	2	30	0	1	22
984	1	25	22.0195					2	3	1	2	3	1	5000	3	1312	1312	2																21097.5	2	6667	6596.96	2						25	0	1	20
985	1	26	22.9134					2	3	0	1	1	3	5000	2	1440	1394.64	3											16090	2	4320	4203.66	3											30	0	0	12
986	1	49	19.5342	1				1	2	1	1	3	1	5000	2	1350	1310.05	1																21097.5	5	5723		2	42195	2	13767	13699.7	2	76	1	1	50	218.92
987	1	32	24.099					2	3	1	2	2	1	5000	3	1848	1848	2	10000	2	3957	3918.92	1																					12	0	0	10
988	1	22	22.3776					2	4	1	2	1	1	5000	4	1947	1965.2	2	10000	3	4020	4020	2											21097.5	2	8640	8522.74	2						14.3	0	0	10
989	1	25	20.202					3	7	1	1	2	1	5000	2	1226	1192.96	4																21097.5	3	5653	5653	3						35	0	0	30
990	1	70	24.3018	1				1	1	0	2	2	1	5000	2	1591	1535.81	1																21097.5	1	7821		1	42195	2	17706	17594.8	1	42	1	1	34
991	1	33	20.2515					3	7	1	1	2	1	5000	3	1490	1490	3																21097.5	3	7809	7809	2						11	1	1	25
992	1	26	23.7496					2	4	1	2	1	1	5000	3	1869	1869	2						8045	3	2872	2872	2																4	0	1	7
993	1	31	21.5477					2	4	0	2	3	1	5000	4	1065	1070.42	2																21097.5	4	4931	5046.39	2						41	0	1	25
994	1	38	22.5394	1				1	1	1	2	2	1	5000	2	1590	1534.87	2																					42195	3	15480	15480	2	30	0	0	20
995	1	32	23.1481	1	1	1	1	2	4	0	2	1	1	5000	2	1260	1225.13	2																21097.5	2	5820	5766.55	2	42195	3	12540	12540	2	45	0	0	40
996	1	31	21.0438					3	6	0	2	3	1	5000	4	1157	1163.4	2	10000	2	2399	2384.95	2																					42	1	1	36
997	1	36	25.2525	1				2	3	0	1	3	1						10000	2	3012	2989.88	3																42195	2	15060	14979.5	3	28	0	0	13	255.18
998	1	38	22.9134	1	1			2	3	0	2	1	1																					21097.5	4	6900	7128.07	2	42195	4	14040	14234.2	1	37	1	0	25
999	1	33	22.7215	1				1	2	1	2	3	1						10000	4	3267	3352.5	3																42195	3	16877	16877	3	35	0	0	25	274.573
1000	1	31	29.0404					2	3	0	2	3	1	5000	4	1410	1419.52	3	10000	3	3060	3060	3											21097.5	3	6380	6380	2						24	0	1	20
1001	1	42	30.101					2	5	1	2	3	3	5000	4	1768	1782.99	1	10000	2	3853	3816.88	2	8045	2	3087	2963.12	2																14	0	0	10
1002	1	31	23.0403					3	7	1	2	3	2	5000	3	1590	1590	2																21097.5	3	7500	7500	2						25	0	1	20
1003	1	35	18.8497	1		1		3	7	1	2	2	1						10000	2	2400	2385.94	2						16090	2	3693	3607.65	1						42195	3	11002	11002	3	75	1	1	55
1004	1	35	23.4918					1	1	0	2	2	1	5000	3	1160	1160	2	10000	3	2522	2522	2																					6.2	0	1	16
1005	1	21	26.7161					1	2	0	3	1	1	5000	4	1113	1118.92	1						8045	4	2172	2266.86	3						21097.5	4	7800	8092.71	3						30	0	1	20
1006	1	45	27.5421	1		1		1	2	0	2	2	1	5000	3	1530	1530	3	10000	3	3120	3120	2																42195	2	15720	15632.3	2	50	1	1	35
1007	1	60	20.5857					1	1	0	2	3	1											8045	3	2023	2023	2	16090	4	4130	4279.17	2	21097.5	3	5773	5773	2						70	0	0	70
1008	1	36	25.5331					2	4	0	2	1	1	5000	3	1363	1363	1																21097.5	2	7380	7294.27	2						35	0	1	25
1009	1	39	22.3621	1	1			2	3	0	2	2	2																					21097.5	3	5410	5410	3	42195	4	11708	11842.7	2	20	1	0	30
1010	1	40	27.4583					3	7	0	2	2	2	5000	4	1250	1257.48	4											16090	4	4345	4510.42	3											28	0	0	23
1011	1	26	22.5497					2	5	1	1	3	1	5000	4	1227	1234.2	2																21097.5	4	6120	6298.75	3						40	0	1	35
1012	1	33	25.2478					2	5	0	2	2	1	5000	3	1299	1299	2	10000	2	2804	2784.82	2																					60	1	0	50
1013	1	33	23.4918	1	1			2	3	1	2	3	2	5000	1	1360		4																21097.5	2	5565	5516.12	2	42195	2	11580	11532.3	1	50	1	0	35	206.114
1014	1	35	22.7036	1				2	3	1	1	3	1	5000	4	1450	1460.07	1																21097.5	5	6670		1	42195	3	15028	15028	1	50	1	0	40	245.247
1015	1	41	24.2705	1		1		3	8	0	2	3	1	5000	4	1134	1140.15	2	10000	3	2360	2360	2																42195	4	11604	11736.3	1	80	1	1	65	187.013	194.349
1016	1	31	27.5993					3	6	0	2	3	1	5000	3	1355	1355	3																21097.5	3	6420	6420	2						30	0	0	25
1017	1	29	23.9702					1	2	1	2	3	1	5000	4	1740	1754.52	2																21097.5	3	7955	7955	2						25	1	0	15
1018	1	35	22.6817					1	2	1	2	2	3						10000	3	3562	3562	1						16090	3	6659	6659	3	21097.5	3	9321	9321	4						20	0	0	15
1019	1	39	29.5895					3	6	0	1	2	1											8045	3	1440	1440	2	16090	2	5220	5051.09	3	21097.5	2	6840	6766.3	2						36	0	0	30
1020	1	39	25.4797					1	2	1	2	2	2																16090	3	6201	6201	3	21097.5	3	8460	8460	4						18	0	0	14
1021	1	47	23.2007	1		1		2	3	0	2	2	2	5000	2	1180	1149.36	2						8045	3	2010	2010	2											42195	3	12840	12840	2	3	1	1	25
1022	1	35	25.2319					2	4	0	2	2	1	5000	2	1250	1215.67	3	10000	2	2862	2842.03	3																					6	0	0	15
1023	1	20	23.6496					2	3	1	2	3	1	5000	2	1875	1798.81	2	10000	3	3691	3691	1																					20	0	0	10
1024	1	34	21.5169					2	3	1	2	1	1	5000	3	1879	1879	2	10000	2	4310	4264.86	2											21097.5	4	9019	9412.66	2						20	0	0	15
1025	1	53	22.8283					2	5	1	2	3	1	5000	3	1815	1815	2																21097.5	4	9138	9542.35	2						17	0	1	11
1026	1	43	20.8699	1	1			2	4	1	1	2	2																					21097.5	4	7813	8106.71	2	42195	2	17927	17813	1	38.5	1	1	30
1027	1	39	29.0237					2	3	0	2	2	1																16090	3	5100	5100	2	21097.5	3	6620	6620	2						20	0	0	14
1028	1	37	23.6772					2	5	0	2	3	3	5000	4	1025	1030.02	2						8045	4	1780	1843.21	2						21097.5	4	4771	4878.94	1						72	1	1	50
1029	1	43	22.8059	1	1			1	2	0	2	2	1																					21097.5	4	5269	5400.96	1	42195	4	11510	11640.2	1	55	1	1	35
1030	1	44	31.1688	1	1			1	1	0	2	3	1																					21097.5	4	6605	6813.69	2	42195	3	14942	14942	2	45	1	0	30	250.857
1031	1	35	22.0195	1	1			2	4	1	2	1	2																16090	1	6855		2	21097.5	2	6450	6384.42	2	42195	4	13090	13258.6	2	38	1	1	28
1032	1	38	19.24	1				1	2	1	2	1	1						10000	2	2850	2830.19	1																42195	4	14107	14303.1	1	55	1	1	40
1033	1	49	23.3742					2	3	0	2	3	1						10000	4	3326	3414.66	1	8045	4	2847	3012.22	3																18	1	1	15
1034	1	31	23.0056	1				3	7	0	2	2	2	5000	3	1229	1229	2																					42195	2	14314	14241.2	2	55	1	1	45
1035	1	23	21.5169	1		1		1	1	1	2	3	1	5000	3	1171	1171	2						8045	4	1870	1939.89	2											42195	4	10991	11109.7	1	73	1	1	65	192.901	202.426
1036	1	35	19.6409	1				1	2	0	2	2	1						10000	4	2716	2774.84	1																42195	3	13111	13111	1	52	1	1	40
1037	1	34	20.8926	1				2	5	1	1	2	1	5000	3	1253	1253	1																21097.5	1	5479		1	42195	4	11880	12018.7	1	45	0	1	35
1038	1	53	27.2262					2	3	0	2	1	1																16090	2	4386	4266.13	2	21097.5	2	5923	5867.65	2						45	1	1	35
1039	1	32	21.8716	1	1	1	1	1	2	1	2	2	2						10000	3	3000	3000	2											21097.5	3	6210	6210	2	42195	2	12700	12642.7	1	70	1	1	45
1040	1	46	25.2121	1	1	1	1	2	3	0	2	2	2						10000	4	2820	2883.48	2											21097.5	3	6600	6600	3	42195	2	13320	13257	1	42	1	0	30
1041	1	27	21.0616	1		1		2	3	0	2	3	3	5000	3	1102	1102	2						8045	3	1827	1827	3											42195	4	10905	11021.8	2	55	0	1	35	193.068	204.359
1042	1	57	35.365					2	4	1	2	3	1	5000	3	2700	2700	3						8045	2	4680	4401.05	3																6	0	0	15
1043	1	35	24.858					3	6	0	1	2	2	5000	2	1053	1028.54	2	10000	2	2210	2198.07	2											21097.5	3	4980	4980	2						10	1	1	35
1044	1	24	21.7452	1				2	4	0	2	2	3						10000	3	2417	2417	3																42195	2	11520	11472.8	2	45	1	1	40
1045	1	35	24.4898					2	3	0	2	3	2	5000	3	1440	1440	3																21097.5	2	7080	7001.06	2						25	0	0	20
1046	1	50	25.7457					1	1	1	2	3	1	5000	4	1647	1660	1	10000	4	3298	3385.16	1											21097.5	3	8604	8604	1						22	1	0	21
1047	1	43	20.6308	1		1		1	2	0	1	1	1	5000	4	1141	1147.23	1	10000	4	2340	2383.54	1																42195	3	11363	11363	1	48	1	0	40
1048	1	37	25.0438					3	8	0	1	1	1	5000	4	1303	1311.13	1						8045	3	2152	2152	2	16090	2	4742	4602.19	2											34	1	0	28
1049	1	34	23.6772	1	1	1	1	1	1	1	2	2	1						10000	4	3592	3695.63	1											21097.5	4	7987	8294.19	2	42195	3	19516	19516	4	40	1	1	25
1050	1	30	26.7161	1		1		1	2	0	2	3	1	5000	4	1234	1241.29	2											16090	4	4197	4351.14	2						42195	4	11620	11752.7	1	30	0	0	23	221.182	222.592
1051	1	38	23.5923	1	1			1	2	0	2	3	2																					21097.5	3	5460	5460	1	42195	3	12120	12120	1	55	0	1	35	204.252
1052	1	44	22.1497					2	3	0	2	3	1	5000	3	1350	1350	2	10000	3	2700	2700	2											21097.5	2	6300	6237.42	2						14	0	0	35
1053	1	25	24.7028					1	2	0	2	3	1	5000	2	1500	1450.84	3																21097.5	2	7790	7694.55	2						25	0	0	20
1054	1	51	23.8496	1	1	1	1	3	6	0	1	3	1	5000	2	1240	1206.21	2																21097.5	4	5813	5974.03	2	42195	4	12648	12805.4	1	58	1	1	35	221.153	219.011
1055	1	39	23.821					2	4	1	2	3	1																16090	4	6300	6653.82	2	21097.5	3	8426	8426	2						30	0	1	26
1056	1	37	23.0056					2	5	0	2	2	3	5000	3	1077	1077	1																21097.5	2	4900	4862.06	1	42195	1	10821		2	70	1	1	60
1057	1	53	22.1332					1	2	0	2	2	1	5000	3	1529	1529	3																21097.5	4	6676	6889.27	1						28	1	1	25
1058	1	46	23.7477	1	1	1	1	2	3	0	1	2	2	5000	2	1258	1223.24	1																21097.5	4	5826	5987.77	2	42195	4	12930	13094.5	2	80	1	1	60
1059	1	29	29.6846					2	4	0	2	3	1	5000	3	1414	1414	2	10000	2	3102	3078.55	3																					15	0	0	10
1060	1	32	22.8059	1	1			1	1	1	2	1	2																					21097.5	2	7682	7589.16	2	42195	3	15473	15473	1	62	1	1	52
1061	1	28	23.0662					1	2	1	2	2	1											8045	3	2651	2651	2						21097.5	2	8525	8410.82	2						35	0	1	28
1062	1	54	29.263	1	1	1	1	2	3	1	2	2	1	5000	3	1680	1680	3																21097.5	2	7080	7001.06	2	42195	2	15840	15750.9	2	54	0	1	50
1063	1	42	26.7466					2	5	1	2	1	3	5000	4	1505	1515.85	1											16090	3	5535	5535	1	21097.5	3	7233	7233	2						33.32	1	1	25
1064	1	24	19.4767	1	1			1	2	0	2	2	1																					21097.5	4	5406	5545	2	42195	3	12432	12432	2	45	1	1	35
1065	1	42	26.7466					2	5	1	2	2	3	5000	4	1505	1515.85	1											16090	3	5535	5535	1	21097.5	3	7233	7233	2						33.32	1	1	27
1066	1	36	21.0724					2	3	1	2	2	3	5000	3	1530	1530	2	10000	2	3227	3201.63	2											21097.5	2	7121	7041.15	2						24	0	0	21
1067	1	20	19.6209					1	2	0	2	2	1	5000	4	1170	1176.55	3																21097.5	4	5700	5854.75	2						25	0	0	20
1068	1	31	23.9702					2	3	1	2	2	1	5000	4	1740	1754.52	3	10000	2	4200	4157.12	4											21097.5	4	8040	8351.36	3						20	1	0	15
1069	1	24	22.9048					2	5	1	2	1	1	5000	4	1680	1693.53	1						8045	3	2940	2940	4						21097.5	1	8119		2						25	1	1	20
1070	1	45	25.2121					1	2	0	2	3	1						10000	4	3040	3113.9	2											21097.5	3	7050	7050	1						35	1	0	25
1071	1	69	23.0662	1	1			4	9	0	2	1	2																					21097.5	3	7020	7020	2	42195	2	14460	14385.7	2	45	1	1	40
1072	1	40	22.3577	1	1	1	1	1	2	1	2	1	2											8045	3	2680	2680	2						21097.5	3	7097	7097	2	42195	3	15922	15922	2	55	1	1	40
1073	1	29	23.4604					3	6	1	1	3	1	5000	4	1440	1449.93	1	10000	4	2967	3037.35	1																					35	1	0	30
1074	1	63	21.0368					1	2	1	2	3	1						10000	4	4140	4278.27	2											21097.5	3	9000	9000	1						12	0	0	35
1075	1	52	25.3224	1	1			1	1	0	2	2	1																					21097.5	4	6969	7201.73	2	42195	2	14275	14202.6	2	43	0	0	30
1076	1	57	24.441					3	6	0	2	1	3	5000	3	1200	1200	1	10000	3	2700	2700	2																					40	1	1	35
1077	1	36	20.9194	1	1	1	1	4	9	0	2	3	1	5000	4	934	938.168	1																21097.5	3	4325	4325	1	42195	3	9398	9398	1	90	1	1	80	155.084	152.986
1078	1	48	25.2478	1		1		1	2	0	2	2	1	5000	2	1220	1187.28	2	10000	4	2441	2488.42	1																42195	4	12059	12202	1	55	1	1	50
1079	1	24	21.0616					1	1	0	2	3	2	5000	3	1080	1080	2																21097.5	4	5313	5447.2	1						46	1	1	35
1080	1	45	24.5511	1	1	1	1	2	3	0	2	2	1						10000	4	2497	2546.64	2											21097.5	2	6296	6233.5	2	42195	2	13392	13328.3	2	42	0	0	35
1081	1	28	20.8699	1	1	1	1	1	2	1	1	1	1						10000	4	2989	3060.41	3											21097.5	3	6848	6848	2	42195	3	14768	14768	2	40	0	1	30
1082	1	28	21.3333					2	3	0	2	1	1						10000	3	2403	2403	2											21097.5	3	5258	5258	1						85	0	1	65
1083	1	49	22.3776	1		1		2	4	1	1	1	1						10000	3	2588	2588	1						16090	2	4498	4372.02	1						42195	2	12275	12221.4	1	74	1	1	63
1084	1	16	19.1355					2	5	0	2	1	1	5000	4	1110	1115.89	3	10000	3	2365	2365	3																					8	1	1	6
1085	1	40	20.0371	1	1	1	1	1	2	0	1	1	1											8045	3	1759	1759	2						21097.5	3	4985	4985	1	42195	3	10600	10600	1	80	0	1	60
1086	1	31	19.2981					1	1	1	2	3	1	5000	4	1135	1141.16	1	10000	2	2382	2368.15	1											21097.5	2	5064	5023.49	1						89	0	1	80
1087	1	56	23.5245	1	1	1	1	2	4	0	1	3	1						10000	2	2548	2532.16	1											21097.5	2	5714	5662.47	2	42195	3	12663	12663	1	65	1	1	50	205.025	205.695
1088	1	25	21.6619	1	1			1	2	1	2	3	1																					21097.5	4	5831	5993.05	2	42195	2	12247	12193.7	2	50	0	0	40	219.547
1089	1	42	23.3747					2	4	0	2	3	1	5000	3	1370	1370	1	10000	2	3082	3058.85	1	8045	3	2358	2358	1																15	1	1	13
1090	1	28	23.8751					2	4	1	2	3	3											8045	3	2820	2820	2	16090	2	5952	5733.39	2	21097.5	4	8118	8435.55	2						22	1	1	15
1091	1	35	20.6563	1	1	1	1	3	6	1	2	2	3						10000	2	2834	2814.41	2											21097.5	3	6462	6462	3	42195	3	14465	14465	3	40	0	0	25
1092	1	39	22.3577	1	1			1	1	0	2	3	2	5000	1	1143		2																21097.5	4	5315	5449.31	2	42195	2	11334	11288.3	2	55	1	1	40	202.015
1093	1	38	23.1481	1	1	1	1	2	3	0	2	1	2						10000	3	2474	2474	2											21097.5	2	5460	5412.94	2	42195	3	11780	11780	1	50	1	1	38
1094	1	29	20.1399	1	1			2	3	1	2	1	2																					21097.5	2	6237	6175.66	1	42195	3	13413	13413	2	45	1	1	40
1095	1	42	25.974	1	1			1	2	0	2	3	3																					21097.5	3	6720	6720	2	42195	3	16500	16500	3	35	0	0	20	253.577
1096	1	67	23.219					2	3	1	2	1	2	5000	4	1262	1269.62	2											16090	4	4208	4362.96	2	21097.5	2	5709	5657.56	2						70	1	1	55
1097	1	43	25.922					1	2	0	2	3	1	5000	4	1260	1267.6	2	10000	2	2610	2593.38	1											21097.5	2	6000	5943.21	2						40	1	1	28
1098	1	29	20.3423					2	5	0	2	1	2	5000	4	881	884.707	4	10000	2	1975	1965.47	2																					77	1	1	50
1099	1	33	26.2984					2	5	1	2	3	1	5000	4	1604	1616.33	4	10000	2	4200	4157.12	3											21097.5	2	6942	6866.1	1						50	1	1	35
1100	1	64	24.2215					2	4	0	2	3	1	5000	4	1300	1308.09	2											16090	4	4530	4710.1	2	21097.5	2	6010	5953.02	2						48	0	1	40
1101	1	44	22.3341	1				3	6	0	2	2	2											8045	3	1784	1784	3											42195	2	10685	10644.4	2	70	1	1	55
1102	1	37	22.5603	1				1	2	0	1	2	1	5000	4	1350	1358.72	3																					42195	3	13502	13502	2	45	1	1	30
1103	1	29	24.4898	1				4	9	0	2	2	1											8045	3	1800	1800	3											42195	3	11011	11011	2	55	1	1	45
1104	1	44	24.209	1	1	1	1	3	7	0	1	2	1						10000	3	2348	2348	2											21097.5	4	5063	5184.73	2	42195	4	10913	11030	1	43	1	1	40
1105	1	33	21.5169	1	1	1	1	1	2	1	1	3	2	5000	4	1188	1194.75	2																21097.5	3	5456	5456	1	42195	4	12510	12663.9	2	55	1	1	45	200.382	199.925
1106	1	27	21.3068					2	5	1	2	1	1	5000	4	1721	1735.2	2																21097.5	3	7308	7308	2						11	0	0	13
1107	1	48	41.4751					1	1	1	2	1	1																16090	2	7953	7567.45	1	21097.5	4	11014	11606.8	1						25	1	0	20
1108	1	27	19.4415	1	1	1	1	1	1	0	2	1	2						10000	4	1993	2024.5	2											21097.5	2	4510	4477.84	2	42195	3	9540	9540	2	90	1	1	80
1109	1	25	30.9844					2	3	1	2	2	2	5000	3	2537	2537	3																21097.5	2	10075	9915.91	3						20	0	0	13
1110	1	35	20.7376	1	1	1	1	2	4	1	2	3	1						10000	3	2781	2781	2											21097.5	3	5880	5880	1	42195	2	12496	12440.5	1	55	1	0	40	215.936	218.382
1111	1	43	25.8137	1				2	3	0	2	1	1																16090	4	4855	5062.46	2						42195	3	13989	13989	2	40	1	0	25
1112	1	45	33.3673					2	3	1	2	2	2	5000	3	2146	2146	3	10000	3	4646	4646	3																					10.5	0	0	8.9
1113	1	40	17.8465	1				1	1	0	2	3	1						10000	2	2620	2603.25	1																42195	4	12518	12672.1	1	60	1	1	45	210.897
1114	1	38	25.2475	1				2	4	0	2	3	1						10000	4	2430	2476.99	1						16090	1	4340		3						42195	3	12510	12510	1	55	1	1	45	201.988
1115	1	28	22.6817	1	1	1	1	2	3	1	2	3	1	5000	4	1176	1182.61	2																21097.5	3	5506	5506	2	42195	2	12510	12454.4	2	65	1	1	60	196.543	198.381
1116	1	42	24.6154					2	4	1	2	1	3	5000	4	1622	1634.61	4											16090	3	5288	5288	2	21097.5	2	6860	6785.87	2						25	0	0	20
1117	1	60	28.0584					2	4	0	2	2	2	5000	2	1930	1849.37	2	10000	2	4150	4108.13	2											21097.5	2	9000	8872.83	4						28	0	0	26
1118	1	29	23.845					2	5	1	2	2	1	5000	2	1565	1511.56	1																21097.5	4	7194	7442.27	2						33	1	1	30
1119	1	37	22.8059	1	1			1	1	0	2	3	1																					21097.5	4	5100	5223.53	2	42195	3	10920	10920	2	50	1	1	35	196.357
1120	1	36	26.2346					2	4	0	2	1	3	5000	4	1264	1271.65	2																21097.5	2	7078	6999.11	2						25	0	0	20
1121	1	36	21.5169	1				3	7	1	2	2	1						10000	3	2340	2340	3																42195	3	11400	11400	2	35	0	1	20
1122	1	37	27.2098	1	1			2	3	0	1	3	2																					21097.5	2	5845	5791.1	2	42195	2	12424	12369.1	2	50	0	0	50	209.016
1123	1	44	22.5779	1	1			2	5	0	2	3	1																					21097.5	2	5833	5779.32	1	42195	2	12823	12764.6	1	50	1	1	45	210.659
1124	1	27	22.1946					1	2	1	2	3	2						10000	3	3150	3150	2											21097.5	4	6510	6712.64	2						20	1	1	18
1125	1	43	22.6079	1	1			1	2	0	2	3	1																					21097.5	3	7270	7270	2	42195	2	16160	16067.3	2	20	0	0	30	265.419
1126	1	35	19.2792	1	1	1	1	2	4	1	1	3	1	5000	3	1183	1183	2																21097.5	3	5530	5530	2	42195	3	11940	11940	2	65	1	1	60	197.268	199.154
1127	1	29	22.7036					2	4	1	2	3	1	5000	3	1403	1403	2																21097.5	2	6752.5	6680.66	2						31	0	1	19
1128	1	40	23.6716					2	5	0	1	2	1	5000	3	1256	1256	2																21097.5	2	6090	6031.51	2						33	1	1	28
1129	1	27	20.369					2	3	1	2	3	1	5000	3	1380	1380	4																21097.5	4	6960	7192.12	3						14	0	1	20
1130	1	34	24.5654					3	8	0	2	1	1	5000	4	1290	1297.96	2						8045	3	2100	2100	1																12	0	0	10
1131	1	35	26.5089					2	3	0	2	1	1	5000	2	1439	1393.7	2																21097.5	4	7191	7439.06	2						10	0	0	19
1132	1	35	23.3742					2	3	1	2	3	1						10000	3	3660	3660	2											21097.5	3	7440	7440	3						40	0	0	35
1133	1	22	21.8716	1	1	1	1	1	2	1	2	1	1						10000	2	2628	2611.15	1											21097.5	2	5627	5577.02	1	42195	4	12065	12208.1	1	62	1	1	62
1134	1	29	21.3859					1	2	1	2	1	2	5000	4	1660	1673.21	2	10000	3	3580	3580	3											21097.5	3	7730	7730	2						20	0	0	18
1135	1	24	25.2475					2	5	1	2	1	1	5000	2	2115	2018.56	4																21097.5	3	8760	8760	2						18	0	0	10
1136	1	53	24.858					3	7	0	3	2	1						10000	4	2818	2881.39	1						16090	4	4880	5089.64	2	21097.5	2	6568	6500.01	2						30	1	1	20
1137	1	38	22.7219					3	7	1	1	2	1	5000	1	1405		2	10000	2	2752	2733.53	2						16090	4	4808	5011.37	2											18	1	1	15
1138	1	53	23.3717	1	1	1	1	2	4	0	2	1	1	5000	3	1240	1240	1																21097.5	3	5702	5702	1	42195	2	12430	12375.1	1	75	1	1	55
1139	1	52	21.0368	1				1	2	1	2	2	2	5000	4	1370	1378.99	2																					42195	4	12578	12733.6	2	57	1	1	50
1140	1	36	22.1497	1	1	1	1	2	3	1	1	3	3	5000	4	1275	1282.78	3																21097.5	3	5940	5940	3	42195	4	14040	14234.2	2	45	0	0	35	220.045	219.448
1141	1	44	23.4918	1		1		2	4	0	2	3	2						10000	4	2410	2456.21	2						16090	2	4120	4014.06	2						42195	2	11524	11476.8	2	21	0	0	35	201.058	203.909
1142	1	40	22.8678	1	1			2	3	1	2	2	1																					21097.5	3	6962	6962	2	42195	2	16440	16344.1	2	36	1	1	35
1143	1	30	21.3792	1				1	2	1	1	3	1	5000	2	1267	1231.75	2																					42195	2	12180	12127.3	1	63	1	1	60	203.829
1144	1	45	21.3859	1				3	6	0	1	2	1	5000	4	1025	1030.02	2																					42195	3	10875	10875	2	82	1	1	65
1145	1	34	22.5183	1	1	1	1	3	6	0	2	2	1	5000	3	988	988	2																21097.5	3	4410	4410	2	42195	2	9533	9500.66	2	85	1	1	65
1146	1	35	22.5779					2	5	0	2	2	1	5000	2	1069	1043.8	2																21097.5	2	4908	4869.94	1						85	1	1	75
1147	1	29	21.3859	1	1			2	3	0	1	1	3																					21097.5	4	4390	4481.22	1	42195	2	9877	9842.29	2	90	1	1	65
1148	1	24	24.57					1	1	0	2	3	1						10000	5	2795		1						16090	4	4419	4590.21	1	21097.5	2	6696	6625.35	1						35	0	0	30
1149	1	55	23.5245					2	4	0	2	2	1	5000	3	1332	1332	2											16090	3	4338	4338	2	21097.5	4	6036	6209.81	2						53	1	1	45
1150	1	33	22.2635					2	4	0	1	3	1	5000	4	1472	1482.38	2						8045	3	2464	2464	3																9	0	0	6
1151	1	29	23.4736					2	5	0	2	1	3	5000	3	987	987	2	10000	3	2083	2083	2	8045	4	1646	1699.91	2																65	1	1	55
1152	1	39	21.3729	1				1	2	0	2	1	2						10000	2	1981	1971.41	2																42195	3	9601	9601	2	130	1	1	90
1153	1	27	22.0386					2	3	1	2	2	1	5000	3	1275	1275	3																21097.5	3	6315	6315	3						30	0	0	30
1154	1	43	31.315					2	5	0	2	1	3																16090	3	7320	7320	4	21097.5	2	9120	8989.44	2						9	0	0	6
1155	1	46	20.419	1				2	5	1	2	3	1	5000	4	1287	1294.93	2																					42195	4	12837	12999.1	1	84	1	1	60	212.559
1156	1	35	19.9677					2	4	1	2	3	2						10000	4	2744	2804.07	2						16090	4	4526	4705.77	1	21097.5	2	6144	6084.47	1						57	1	1	53
1157	1	34	21.8716	1	1	1	1	1	1	1	1	1	2						10000	3	2640	2640	2											21097.5	2	5733	5681.13	2	42195	3	12255	12255	1	46	0	1	35
1158	1	34	25.6631	1	1			2	3	0	2	1	2																					21097.5	4	5880	6044.82	1	42195	3	14820	14820	2	35	0	1	25
1159	1	16	18.3308					2	4	0	1	1	1	5000	3	945	945	2	10000	4	2040	2073.01	2																					65	1	1	62
1160	1	24	25.2525					3	6	0	2	1	3	5000	3	1053	1053	2						8045	2	1799	1756.21	3																50	1	1	30
1161	1	38	24.6704					1	2	0	2	3	1	5000	2	1590	1534.87	2																21097.5	2	8280	8172.24	2						12	0	0	20
1162	1	38	27.4116	1				2	3	0	2	2	3	5000	3	1320	1320	3																					42195	4	18026	18347.4	2	18	0	0	15
1163	1	32	24.5956	1	1	1	1	1	2	1	1	3	1						10000	4	2530	2580.98	2											21097.5	4	5710	5865.3	2	42195	2	12835	12776.4	2	58	1	1	50	211.307	212.306
1164	1	47	25.8981					1	1	0	2	2	1	5000	3	1248	1248	2																21097.5	3	5980	5980	2						19.5	0	1	16
1165	1	32	25.8121	1		1		1	2	0	2	2	2	5000	4	1248	1255.45	1											16090	4	4260	4418.89	2						42195	2	14459	14384.7	2	43	0	1	35
1166	1	43	23.7547					2	3	1	2	3	1	5000	3	1749	1749	1	10000	4	3334	3423.1	1											21097.5	3	7499	7499	1						23	1	1	16
1167	1	31	25.7594	1	1	1	1	1	2	0	2	2	1	5000	2	1198	1166.43	2																21097.5	3	6008	6008	2	42195	4	13025	13192	1	50	1	0	35
1168	1	40	22.2635	1	1	1	1	2	4	0	1	3	1	5000	3	912	912	2																21097.5	3	4205	4205	2	42195	3	8657	8657	2	125	1	1	100	147.33	145.86
1169	1	40	25.2048	1	1			2	3	0	1	3	1																					21097.5	4	6080	6256.39	2	42195	3	13585	13585	1	40	1	0	35	230.287
1170	1	32	23.4918	1	1	1	1	3	6	0	2	3	1	5000	2	1205	1173.07	1																21097.5	2	5644	5593.72	1	42195	3	13087	13087	2	50	1	1	35	208.682	205.962
1171	1	45	24.3018					1	2	0	2	1	1	5000	3	1367	1367	2	10000	3	2815	2815	2											21097.5	2	6828	6754.55	2						14	1	1	28
1172	1	46	21.2331					1	2	1	2	1	1	5000	3	1860	1860	2	10000	2	4283	4238.42	2																					15	0	1	10
1173	1	44	22.7949	1				1	2	0	2	2	1	5000	4	1423	1432.7	3	10000	5	2959		2																42195	3	13456	13456	1	70	1	1	50
1174	1	44	23.5923	1	1	1	1	1	2	0	2	1	1	5000	3	1196	1196	2																21097.5	3	5386	5386	1	42195	4	11985	12126.2	1	45	0	0	35
1175	1	28	25.8981					1	2	0	2	2	1	5000	3	1350	1350	1											16090	3	5700	5700	3	21097.5	2	6360	6296.23	1						35	1	1	25
1176	1	58	24.156					1	2	0	2	2	3	5000	3	1226	1226	2	10000	2	2524	2508.45	2																					42	0	0	36
1177	1	28	24.9748	1				3	6	0	2	2	1	5000	2	1144	1115.18	2																					42195	3	11200	11200	2	67	0	1	57
1178	1	60	19.5312					1	2	1	1	2	1	5000	2	1665	1604.65	1	10000	2	3550	3519.32	1											21097.5	4	7804	8097.02	2						28	0	1	25
1179	1	33	23.0824					2	3	1	2	1	1	5000	3	1393	1393	1	10000	4	3173	3253.59	1																					25	1	1	20
1180	1	38	26.4876					2	3	1	2	1	1											8045	4	2737	2889.36	3						21097.5	4	6941	7171.84	1						26	0	0	20
1181	1	31	23.8496	1	1			1	2	0	2	2	3																					21097.5	2	6900	6825.01	2	42195	4	14160	14357.5	1	50	0	0	35
1182	1	27	23.8158					2	3	1	2	1	1	5000	4	1387	1396.21	2																21097.5	4	6445	6643.55	2						25	1	0	20
1183	1	40	22.7273					1	2	0	1	2	1	5000	4	1138	1144.19	1						8045	2	1953	1902.67	1						21097.5	4	5512	5656.58	2						33	1	1	25
1184	1	37	21.0758	1	1			1	1	1	2	3	2																					21097.5	2	6534	6466.71	1	42195	3	13812	13812	2	48	1	0	35	237.024
1185	1	26	24.7372	1	1			2	3	1	1	1	2																					21097.5	3	6606	6606	3	42195	2	14668	14591.6	2	43	0	0	35
1186	1	38	24.0445					2	5	0	2	1	1						10000	4	2857	2922.18	2	8045	1	2427		1						21097.5	3	6435	6435	1						14.68	1	0	20
1187	1	50	22.9632					2	4	0	2	3	1	5000	4	1346	1354.67	2	10000	2	3009	2986.93	3						16090	4	4698	4891.99	2											22	0	1	16
1188	1	25	22.3776					2	4	1	2	1	1											8045	3	1998	1998	2						21097.5	3	5469	5469	1	42195	1	12374		1	60	1	1	45
1189	1	56	25.4797	1				3	6	0	1	2	2	5000	3	1230	1230	3																					42195	3	14650	14650	3	40	0	1	25
1190	1	38	19.4873					2	5	1	2	3	2	5000	3	1501	1501	2	10000	2	3235	3209.5	2											21097.5	2	6900	6825.01	1						26	1	1	20
1191	1	28	21.7096	1	1	1	1	1	2	1	2	1	1																16090	3	4200	4200	2	21097.5	3	5674	5674	2	42195	2	12153	12100.5	2	40	1	0	35
1192	1	30	21.7452					2	4	0	1	3	1						10000	4	2207	2245.69	2											21097.5	4	4773	4881.03	1	42195	5	10996		1	38	1	1	30		181.948
1193	1	40	19.7956					2	3	1	2	3	1						10000	2	2805	2785.81	1											21097.5	3	6169	6169	2	42195	1	13859		2	53	0	1	47		225.24
1194	1	26	23.219	1	1	1	1	3	6	0	2	2	1	5000	3	1011	1011	1																21097.5	2	4614	4580.35	1	42195	2	10087	10050.8	1	105	1	1	72
1195	1	29	22.0334	1	1	1	1	2	3	1	2	1	1											8045	4	2104	2192.89	3						21097.5	3	5919	5919	2	42195	2	12352	12297.8	2	46	1	0	40
1196	1	29	22.0373	1				2	4	0	2	2	1	5000	4	989	993.674	4											16090	1	3292		1						42195	3	9392	9392	3	40	1	0	25
1197	1	39	22.0386					2	3	1	2	2	1						10000	2	3686	3652.93	2											21097.5	3	8020	8020	2	42195	1	10911		2	40	1	1	22
1198	1	46	32.0715					2	3	0	2	3	1	5000	3	2469	2469	3						8045	3	3436	3436	3																4	0	0	10
1199	1	36	23.0057	1	1	1	1	1	2	0	2	2	1	5000	4	1065	1070.42	2																21097.5	4	4697	4801.58	2	42195	2	10473	10434	1	75	0	0	60
1200	1	32	24.9685	1	1			2	4	0	2	3	2																					21097.5	4	5750	5907.52	1	42195	2	13131	13069.7	1	50	1	1	45	214.691
1201	1	34	23.1677	1	1			2	3	1	2	1	1																					21097.5	3	5970	5970	1	42195	4	14268	14468.6	1	44	0	0	36
1202	1	25	21.9138	1	1	1	1	2	5	0	2	1	1	5000	4	1020	1024.97	1																21097.5	4	4555	4653.29	1	42195	3	10021	10021	1	55	1	1	40
1203	1	26	21.0724					2	3	1	2	1	2	5000	2	1320	1281.78	2						8045	2	2280	2211.71	2						21097.5	2	6120	6060.93	2						45	1	1	36
1204	1	48	23.7477	1	1			1	2	0	2	3	3																					21097.5	2	6732	6660.6	1	42195	2	15840	15750.9	4	26	0	0	22	250.416
1205	1	37	29.4613					1	1	0	2	1	1						10000	2	2659	2641.75	2						16090	2	5667	5468.47	4											16	0	0	15
1206	1	35	24.0445	1		1		3	7	0	2	3	1						10000	4	2249	2289.19	1						16090	4	3672	3789.45	1						42195	3	10861	10861	1	74	0	1	52	185.484	186.94
1207	1	27	25.7937					2	4	0	2	3	1	5000	4	1206	1212.96	2																21097.5	2	6420	6355.03	1						30	1	1	20
1208	1	49	20.5227	1	1	1	1	2	3	1	2	2	1	5000	4	1285	1292.9	1																21097.5	3	6030	6030	1	42195	4	13020	13186.8	1	65	0	1	50
1209	1	52	23.0834					2	3	0	1	1	2	5000	4	1240	1247.36	2																21097.5	3	5840	5840	2						55	1	1	40
1210	1	49	23.2727	1				2	5	0	3	1	1						10000	4	3405	3497.98	1																42195	3	15873	15873	1	20	1	1	20
1211	1	29	24.2215	1	1	1	1	2	3	0	2	1	3						10000	3	2570	2570	2											21097.5	4	5550	5696.61	1	42195	4	12225	12372	1	60	1	1	35
1212	1	38	22.2635	1	1	1	1	2	4	0	1	3	2						10000	3	2280	2280	2											21097.5	3	5220	5220	2	42195	3	11220	11220	2	70	1	1	65	186.224	185.893
1213	1	43	24.57	1	1	1	1	2	3	0	2	3	1						10000	2	2562	2545.98	2											21097.5	3	5541	5541	2	42195	3	11762	11762	2	90	1	1	70	194.097	198.573
1214	1	26	24.5511					2	3	0	2	1	2	5000	3	1160	1160	3	10000	2	2468	2453.13	2											21097.5	3	5460	5460	3						40	0	1	30
1215	1	22	21.7452					3	8	0	2	3	2	5000	3	1220	1220	2						8045	4	2258	2360.7	3																20	1	1	17
1216	1	42	22.1661	1	1			1	2	0	2	3	2																					21097.5	4	4989	5107.15	2	42195	2	10522	10482.6	1	65	1	1	55	185.907
1217	1	28	28.4019	1	1			1	1	1	2	2	1																					21097.5	4	7140	7384.5	1	42195	3	16800	16800	1	40	0	0	30
1218	1	44	21.6153					1	2	0	2	3	3																16090	3	4816	4816	2	21097.5	4	6994	7228.43	3						18	0	0	15
1219	1	37	25.8203					2	4	0	2	3	2	5000	2	1370.5	1329.35	2	10000	3	2850	2850	2																					50	0	1	35
1220	1	28	18.821					2	4	1	2	2	2	5000	2	1297	1260.08	2																21097.5	3	5574	5574	1	42195	5	12246		1	60	1	0	50
1221	1	28	22.2055					2	3	1	1	2	1	5000	3	1800	1800	2																21097.5	3	7860	7860	1						20	0	0	16
1222	1	26	20.0371	1	1			3	6	0	1	1	1																					21097.5	4	4980	5097.72	2	42195	3	10822	10822	1	65	0	0	55
1223	1	34	26.6554					2	3	0	2	3	2	5000	3	1470	1470	2	10000	3	3180	3180	2																					25	1	0	20
1224	1	27	23.8434	1	1	1	1	1	1	1	1	2	2																16090	4	3820	3947.27	2	21097.5	3	4945	4945	1	42195	2	11145	11100.8	1	83	1	1	65
1225	1	25	20.4712	1		1		2	5	0	2	3	2	5000	4	852	855.467	1											16090	3	3300	3300	3						42195	3	10560	10560	3	105	1	1	30	169.902	164.107
1226	1	31	21.0368	1				1	2	1	2	1	1	5000	3	1223	1223	2																					42195	2	12500	12444.5	2	51	0	1	40
1227	1	32	22.9134	1	1	1	1	4	9	0	2	1	1						10000	4	2066	2099.87	2											21097.5	2	4478	4446.29	1	42195	2	10349	10310.9	2	64	1	1	55
1228	1	35	26.6902	1	1	1	1	2	4	0	2	3	1	5000	4	1297	1305.05	2																21097.5	4	6510	6712.64	2	42195	3	15000	15000	1	50	1	1	40	242.123	243.831
1229	1	53	29.0972					2	4	0	2	1	2	5000	2	1547	1494.77	3	10000	3	3191	3191	3																					25	0	0	20
1230	1	31	21.0724	1		1		1	2	1	2	3	1	5000	2	1282	1245.92	2											16090	2	4335	4217.87	1						42195	4	12500	12653.7	1	60	1	1	50	204.214	209.426
1231	1	34	28.3108					2	3	1	2	1	1	5000	3	2193	2193	1																21097.5	3	9900	9900	2						15	0	0	5
1232	1	64	23.3742					1	1	0	2	2	1	5000	3	1790	1790	3																21097.5	3	7200	7200	3						12	0	0	25
1233	1	38	28.1137	1	1	1	1	2	3	0	2	1	1						10000	4	2860	2925.31	2											21097.5	3	6678	6678	2	42195	3	16280	16280	4	55	0	1	40
1234	1	46	27.0379	1		1		2	4	0	2	2	1	5000	3	1426	1426	2	10000	3	3026	3026	2																42195	3	14378	14378	1	40	1	1	30
1235	1	28	22.3776	1	1	1	1	2	3	1	2	3	1	5000	4	1146	1152.28	1																21097.5	3	5204	5204	1	42195	4	11835	11972.7	2	55	1	1	45	192.264	190.933
1236	1	35	24.9685					1	2	0	1	1	2						10000	2	2646	2628.92	1						16090	1	4686		1	21097.5	2	5887	5832.32	1						22	0	1	20
1237	1	19	20.7792					3	7	0	2	3	1	5000	4	1423	1432.7	2	10000	4	2930	2998.59	2																					15	1	1	10
1238	1	34	22.1089					2	5	0	2	2	1	5000	3	1133.5	1133.5	2	10000	2	2830	2810.47	2																					17	0	0	12
1239	1	66	20.7632	1	1	1	1	2	5	0	2	1	1	5000	3	1446	1446	2																21097.5	3	6556	6556	2	42195	3	18930	18930	2	60	1	1	45
1240	1	44	23.4287	1	1			1	2	0	2	2	1																					21097.5	4	6480	6680.75	2	42195	4	15310	15541.2	2	49	0	0	35
1241	1	24	20.198	1	1	1	1	1	1	0	2	1	1											8045	3	1550	1550	2						21097.5	4	4255	4340.65	1	42195	4	9130	9211.72	1	86	1	1	75
1242	1	30	23.9702	1	1			2	4	1	2	2	3																					21097.5	2	7694	7600.87	2	42195	3	17827	17827	2	25	0	0	20
1243	1	34	21.7047					1	1	1	2	1	1	5000	3	1360	1360	2											16090	1	5057		2	21097.5	3	6221	6221	2						45	0	0	30
1244	1	28	21.6407	1	1	1	1	1	1	0	2	2	2						10000	2	1860	1851.54	1											21097.5	4	3890	3961.46	1	42195	4	8242	8308.54	2	130	1	1	120
1245	1	32	24.441					2	3	0	2	3	1											8045	2	2610	2520.89	2						21097.5	3	8220	8220	2						42	0	1	35
1246	1	30	23.5923	1	1	1	1	1	1	1	2	1	1																16090	4	5100	5329.42	2	21097.5	4	7080	7320.33	2	42195	4	15496	15732.9	2	70	1	0	50
1247	1	33	23.9369	1	1	1	1	2	4	0	2	1	2						10000	4	1920	1949.22	2											21097.5	4	4171	4253.26	1	42195	4	8797	8872.84	1	104	1	1	70
1248	1	42	27.5244					2	3	0	2	3	1											8045	3	2870	2870	2	16090	3	6607	6607	2											30	0	0	25
1249	1	38	23.7047					2	5	0	2	3	1	5000	3	1439	1439	2																21097.5	3	7095	7095	2						22	1	1	18
1250	1	30	28.8543					2	4	0	1	2	1						10000	4	3604	3708.34	2											21097.5	4	7800	8092.71	1						24.5	0	0	17
1251	1	38	33.3807					1	1	1	2	3	1	5000	3	2167	2167	2	10000	3	4507	4507	2																					20	0	0	18
1252	1	31	23.2419	1	1	1	1	2	3	0	2	3	1											8045	3	2034	2034	1						21097.5	3	6020	6020	1	42195	2	14460	14385.7	2	50	1	1	38	221.297	219.535
1253	1	38	30.7068					2	3	0	2	3	2						10000	4	3370	3461.06	3	8045	2	2730	2632.66	3																15	0	0	10
1254	1	42	25.954					3	8	0	1	1	1						10000	3	2296	2296	3											21097.5	4	5640	5791.47	4						20	1	1	15
1255	1	28	24.8506	1	1	1	1	2	3	0	1	2	1											8045	2	2667	2574.03	4						21097.5	2	6642	6572.48	2	42195	3	14161	14161	1	50	1	1	40
1256	1	34	22.1946					2	4	1	2	2	1											8045	2	1995	1942.52	3						21097.5	4	5344	5479.79	2						55	1	1	45
1257	1	36	23.5923	1	1	1	1	2	4	0	1	1	2	5000	4	1053	1058.3	1																21097.5	4	4688	4792.18	1	42195	4	10050	10149.1	1	70	1	1	60
1258	1	34	24.9597					3	7	0	2	2	2						10000	4	2542	2593.47	1											21097.5	4	5938	6106.13	1						30	1	1	20
1259	1	35	24.6259					3	6	0	2	1	1	5000	3	1806	1806	3	10000	3	3450	3450	2																					20	1	0	15
1260	1	30	19.7011					2	4	1	2	1	1	5000	4	1278	1285.82	2	10000	4	2664	2720.58	2											21097.5	4	6092	6269.1	2						33	1	1	30
1261	1	38	23.9192					3	7	0	2	3	1	5000	4	1194	1200.82	2																21097.5	2	5340	5294.97	2						60	1	1	45
1262	1	55	22.5603	1	1	1	1	1	1	0	2	1	1											8045	4	1920	1993.75	2						21097.5	3	5340	5340	2	42195	2	11940	11889.3	2	60	1	1	55
1263	1	38	23.906	1		1		2	4	0	2	1	3	5000	3	1287	1287	2	10000	2	2737	2718.73	2																42195	2	13468	13403.5	1	55	0	0	45
1264	1	23	15.4284					1	1	1	1	2	1	5000	4	1009	1013.87	1																21097.5	2	4493	4461.08	1						100	1	1	90
1265	1	49	23.8496	1				2	5	0	2	3	1	5000	4	1194	1200.82	2																					42195	3	11998	11998	2	44	1	1	38	207.835
1266	1	34	20.3201					1	2	0	2	1	1	5000	4	969	973.487	1											16090	1	3659		1	21097.5	3	4603	4603	2						70	1	1	50
1267	1	29	25.7457	1		1		2	4	1	2	2	1	5000	4	2025	2044.69	1											16090	3	6973	6973	3						42195	3	20430	20430	2	33	0	0	18
1268	1	29	23.2383					3	6	1	1	3	1	5000	2	1361	1320.41	2	10000	4	2836	2900.21	2											21097.5	3	8580	8580	4						16	0	0	30
1269	1	31	25.1632					2	3	1	2	3	1	5000	4	1943	1961.12	1						8045	4	3174	3380.73	3																6	0	0	6
1270	1	29	20.419					1	1	1	1	3	1	5000	4	1320	1328.34	2																21097.5	3	7200	7200	4						10	0	0	0
1271	1	30	23.4918					1	2	1	2	2	1						10000	4	3259	3344.08	2						16090	4	5310	5559.16	2						42195	1	16093		2	40	0	0	30
1272	1	16	22.2635					1	1	0	2	1	2						10000	2	2459	2444.24	2											21097.5	4	5755	5912.79	2						90	1	1	80
1273	1	48	27.4939					2	5	0	2	3	2	5000	2	1318	1279.9	1																21097.5	2	6323	6259.97	1	42195	1	14363		1	62	0	1	55		225.375
1274	1	35	22.7219	1				2	3	1	2	3	2																16090	2	4463	4338.95	1						42195	2	13072	13011.3	1	70	1	1	65	203.405
1275	1	40	24.3018	1	1			2	3	1	2	3	2																					21097.5	4	6887	7114.2	2	42195	4	14750	14964.5	2	55	1	0	38	255.609
1276	1	23	17.73	1	1			1	2	0	2	2	2	5000	1	982		4																21097.5	4	4533	4630.33	3	42195	3	9780	9780	2	50	0	0	40
1277	1	36	22.0386	1	1			2	3	0	2	1	1																					21097.5	3	5003	5003	1	42195	2	11395	11348.8	1	97	1	1	75
1278	1	36	23.0303	1	1			1	2	1	1	1	1																					21097.5	3	5622	5622	2	42195	2	12291	12237.3	1	54	1	1	48
1279	1	49	23.3258	1	1			2	4	0	1	3	1																					21097.5	3	5027	5027	2	42195	4	10701	10813.4	1	62	0	1	53	183.996
1280	1	43	24.3044	1				2	3	0	2	2	1	5000	3	1123	1123	2																					42195	3	11593	11593	1	65	1	1	50
1281	1	36	32.0594	1		1		1	1	0	1	1	3	5000	2	2010	1922.7	4						8045	3	2400	2400	2											42195	3	15600	15600	1	45	1	0	25
1282	1	34	23.2492	1	1	1	1	3	6	0	1	1	2	5000	4	1178	1184.64	2																21097.5	4	5880	6044.82	1	42195	3	13320	13320	1	50	0	0	42.5
1283	1	30	22.5779	1	1	1	1	1	1	0	1	2	1						10000	4	1992	2023.47	1											21097.5	4	4752	4859.07	2	42195	3	11040	11040	2	100	1	1	50
1284	1	26	23.8496					3	6	0	1	3	1	5000	4	1010	1014.88	2	10000	3	2150	2150	2											21097.5	4	4479	4574	1						50	1	1	45
1285	1	43	24.2882					3	7	0	2	2	1	5000	3	1097	1097	2	10000	4	2313	2355.53	2																					36	1	1	30
1286	1	39	26.732					2	3	1	2	1	1	5000	4	1678	1691.5	2																21097.5	4	7230	7480.81	1						20	0	0	13
1287	1	35	22.0195	1	1			2	4	1	1	1	1																					21097.5	3	6064	6064	2	42195	3	12546	12546	2	55	1	1	45
1288	1	31	26.5089					1	2	0	1	2	1						10000	3	2955	2955	1											21097.5	3	7440	7440	3						30	0	1	15
1289	1	28	23.0834	1				2	3	0	1	3	1	5000	2	1324	1285.55	2																					42195	3	13320	13320	2	46	0	0	27	225.643
1290	1	38	28.3108					2	4	0	2	1	1	5000	2	1620	1562.81	2	10000	2	3420	3391.52	2																					30	0	0	25
1291	1	30	20.0351	1	1			1	1	1	2	1	3																					21097.5	4	6090	6266.98	3	42195	2	12996	12936	1	45	0	0	30
1292	1	26	22.0373					3	6	1	2	2	1						10000	4	2730	2789.45	2											21097.5	3	6270	6270	2						53	1	1	50
1293	1	31	23.4918					2	4	1	2	1	2						10000	2	3240	3214.42	2											21097.5	2	8040	7938.36	2						12	1	1	25
1294	1	26	21.3522					2	3	0	2	1	1	5000	3	1112	1112	3																21097.5	4	5187	5314.84	2						50	1	1	44
1295	1	39	21.3859	1				2	4	0	1	1	2											8045	3	1662	1662	2											42195	4	11462	11591.1	1	70	1	1	55
1296	1	26	22.2414					2	3	0	1	3	2	5000	3	1100	1100	1																21097.5	3	5370	5370	1						70	1	1	40
1297	1	67	22.5064					2	3	0	2	3	1						10000	3	3242	3242	2											21097.5	4	7198	7446.55	3						30	0	0	24
1298	1	31	22.6817	1	1	1	1	2	3	1	2	1	1						10000	3	2406	2406	2											21097.5	4	5330	5465.07	1	42195	2	12204	12151.1	2	60	0	0	35
1299	1	53	25.8203					1	2	1	2	2	1						10000	2	3750	3715.78	2											21097.5	3	8040	8040	2						20	1	0	15
1300	1	46	19.6409	1	1	1	1	1	1	0	1	1	1	5000	2	1013	990.339	1																21097.5	3	4594	4594	2	42195	3	9838	9838	1	70	1	1	45
1301	1	48	20.202	1	1	1	1	1	1	0	1	3	1						10000	4	2078	2112.27	1											21097.5	3	4534	4534	1	42195	3	10020	10020	1	70	1	1	45	170.202	167.013
1302	1	48	20.7612	1	1			3	7	1	2	1	1																					21097.5	3	5587	5587	1	42195	2	12072	12020.2	1	55	1	1	45
1303	1	31	25.7457					2	3	1	2	1	1						10000	3	3030	3030	1	8045	3	2428	2428	2						21097.5	2	6570	6501.97	1						35	0	0	30
1304	1	22	24.1875					2	3	1	1	1	1	5000	4	1478	1488.46	3																21097.5	2	7380	7294.27	2						35	1	1	25
1305	1	18	23.3717					2	3	0	2	1	2						10000	3	3270	3270	3						16090	3	4746	4746	2	21097.5	3	6540	6540	2						30	0	1	20
1306	1	41	24.0388					2	5	0	2	3	1	5000	3	1260	1260	2	10000	4	2760	2820.78	4											21097.5	3	6180	6180	3						65	0	1	50
1307	1	32	25.8981	1				2	3	0	2	2	1	5000	2	1284	1247.81	2						8045	1	2024		2											42195	3	12075	12075	2	57	1	1	50
1308	1	45	26.6554	1	1	1	1	2	3	0	2	2	3						10000	2	3240	3214.42	3											21097.5	2	7020	6942.39	2	42195	2	15600	15513.6	2	29	0	0	22
1309	1	33	20.9276	1		1		2	4	0	2	3	3	5000	3	1019	1019	2	10000	3	2087	2087	1																42195	3	10719	10719	3	80	0	1	70	167.087	171.024
1310	1	35	19.6765	1	1			1	1	1	2	2	3																					21097.5	4	5040	5160.61	1	42195	2	11160	11115.7	2	20	1	1	50
1311	1	34	19.4415	1				2	5	0	2	1	1	5000	2	1080	1054.28	2																					42195	3	10485	10485	2	44	1	1	37
1312	1	54	22.3341	1	1	1	1	2	3	1	1	3	1						10000	4	2895	2961.94	2											21097.5	4	6155	6335.84	2	42195	3	12649	12649	1	65	0	1	58	221.98	230.615
1313	1	43	23.0834					3	7	0	1	1	1	5000	3	1229	1229	1	10000	3	2646	2646	1											21097.5	3	5901	5901	1						40	1	1	35
1314	1	32	26.1646	1	1			1	1	1	1	3	1																					21097.5	4	7980	8286.64	2	42195	3	19200	19200	2	45	1	0	35	293.029
1315	1	30	24.4432					2	4	1	2	1	1	5000	2	1737	1671.42	2						8045	3	3051	3051	3																12	1	0	8
1316	1	42	28.2599	1				1	2	0	2	3	1	5000	3	1590	1590	2																					42195	2	21180	21021	2	40	0	0	30	270.165
1317	1	30	21.5377					3	7	1	2	2	1	5000	4	1459	1469.2	1						8045	3	2404	2404	2																33	1	1	25
1318	1	52	24.7879					2	3	0	2	1	3	5000	4	1980	1998.82	2																21097.5	3	7449	7449	1						30	0	0	25
1319	1	29	31.1419	1	1	1	1	2	4	0	2	3	1	5000	3	1395	1395	3																21097.5	3	6060	6060	2	42195	2	13560	13494.7	2	50	0	1	45	219.456	223.332
1320	1	37	24.2215	1	1	1	1	3	7	0	2	1	2	5000	3	1036	1036	1																21097.5	3	4694	4694	1	42195	4	10558	10667.4	2	65	0	1	52
1321	1	35	23.1481					2	5	0	1	1	3	5000	4	1261	1268.61	2	10000	3	2820	2820	1																					30	0	0	24
1322	1	27	24.3018					2	4	1	2	1	1	5000	4	1335	1343.53	2																21097.5	2	6549	6481.4	2						12	1	1	25
1323	1	44	18.8735	1				1	1	1	1	1	1						10000	4	2261	2301.63	1																42195	2	10077	10040.9	1	104	1	1	95
1324	1	27	21.3068	1	1			1	1	1	2	2	2																					21097.5	4	6619	6828.59	2	42195	3	15965	15965	2	35	0	1	30
1325	1	33	19.8864	1	1	1	1	1	1	1	2	2	1																16090	3	4030	4030	1	21097.5	3	5243	5243	1	42195	2	11341	11295.3	1	60	0	0	50
1326	1	41	23.7496	1	1			1	2	0	2	3	1																					21097.5	3	6660	6660	2	42195	3	13680	13680	2	50	0	0	26	248.126
1327	1	29	22.2635	1				2	3	0	2	2	2	5000	4	1057	1062.34	2																					42195	4	10853	10968.7	2	65	1	1	55
1328	1	33	24.209	1				4	10	0	2	1	1	5000	4	1025	1030.02	1																					42195	2	12060	12008.3	2	58	1	0	48
1329	1	41	18.9197					2	4	1	3	2	1	5000	3	1390	1390	4																21097.5	3	6960	6960	3						35	1	1	30
1330	1	34	23.0403	1				3	7	0	2	2	2						10000	3	2494	2494	1																42195	4	12197	12343.3	1	60	1	1	50
1331	1	23	24.57					2	5	0	2	3	1	5000	3	1070	1070	2											16090	3	3720	3720	2											70	1	1	35
1332	1	30	21.2556	1	1	1	1	2	5	1	1	1	1	5000	4	1230	1237.24	2																21097.5	4	5940	6108.25	1	42195	4	13020	13186.8	1	40	1	1	30
1333	1	58	21.0438	1	1	1	1	2	3	0	2	3	2	5000	4	1090	1095.68	2																21097.5	4	4924	5039.06	2	42195	2	10936	10893.5	2	53	1	1	44	187.217	184.678
1334	1	38	27.8661					2	3	0	2	3	1						10000	4	3320	3408.34	2											21097.5	2	7740	7645.76	2						18	1	0	13
1335	1	31	23.0057	1	1	1	1	2	4	1	2	3	1	5000	4	1207	1213.97	1																21097.5	3	5990	5990	2	42195	2	12731	12673.4	1	35	1	1	32	223.027	220.336
1336	1	32	20.0371	1	1	1	1	1	2	0	2	1	1						10000	4	2157	2193.94	2											21097.5	2	5100	5058.91	2	42195	4	11031	11150.5	2	30	0	1	45
1337	1	42	24.6259	1	1	1	1	2	3	0	1	3	1	5000	3	1145	1145	2																21097.5	2	5345	5299.89	2	42195	4	11043	11162.8	2	58	1	1	45	195.365	193.904
1338	1	50	25.9686					2	3	0	1	2	1	5000	4	1349	1357.71	2	10000	4	2888	2954.61	2						16090	2	5157	4992.08	2											35	0	1	25
1339	1	37	20.6221	1		1		3	7	0	2	1	1	5000	4	1121	1127.01	2	10000	3	2288	2288	1																42195	4	10512	10620.5	1	80	1	1	70
1340	1	28	29.2969					2	4	1	2	3	2	5000	3	1951	1951	3																21097.5	2	9407	9268.16	3						20	1	1	15
1341	1	50	24.959					2	3	0	1	2	1						10000	3	2661	2661	2						16090	2	4915	4764.97	2	21097.5	3	6404	6404	2						38	0	1	24
1342	1	43	23.6772					2	3	0	2	1	2						10000	4	2820	2883.48	2											21097.5	2	5880	5825.45	1						38	1	1	25
1343	1	37	22.1497	1	1	1	1	3	7	0	2	3	1	5000	4	1027	1032.04	2																21097.5	2	4875	4837.45	2	42195	3	10576	10576	2	100	1	1	70	173.153	172.465
1344	1	34	24.441	1	1			2	4	0	2	2	3																					21097.5	4	4762	4869.53	1	42195	2	10487	10447.9	2	70	1	0	60
1345	1	37	24.5262	1	1			2	3	0	2	3	1																					21097.5	3	5292	5292	2	42195	3	11262	11262	2	75	0	1	60	190.03
1346	1	26	42.4242					1	1	1	2	2	1	5000	3	2103	2103	4																21097.5	3	11105	11105	3						13	0	0	12
1347	1	45	22.2453					3	6	0	2	3	2	5000	3	1312	1312	2																21097.5	3	5964	5964	2						25	0	1	15
1348	1	40	31.0184					1	2	0	1	1	1	5000	3	1677	1677	2																21097.5	4	7962	8267.23	2						30	0	0	25
1349	1	35	24.5262					3	6	0	2	3	1	5000	2	1260	1225.13	1	10000	4	2460	2508.17	1																					25	1	1	18
1350	1	39	23.6151					2	3	1	1	2	1	5000	3	1535	1535	2	10000	3	3183	3183	3											21097.5	4	6902	7130.21	2						44	1	0	40
1351	1	40	23.0056	1	1			1	1	0	2	3	1																					21097.5	2	7139	7058.75	2	42195	3	14940	14940	2	48	1	1	38	253.908
1352	1	46	30.297					2	3	0	2	3	1						10000	3	2700	2700	2	8045	4	2160	2253.79	3						21097.5	3	5940	5940	2						58	0	0	40
1353	1	41	23.2939					3	6	0	2	2	1	5000	3	950	950	1						8045	2	1565	1532.52	1																75	1	1	60
1354	1	44	23.8751					1	2	1	2	2	2	5000	4	1454	1464.13	3	10000	3	2654	2654	2											21097.5	5	6358		2						30	0	0	25
1355	1	18	18.2876					3	6	0	2	3	1	5000	3	1140	1140	3	10000	2	3000	2978.06	4																					50	1	1	30
1356	1	21	21.2498	1	1	1	1	2	3	0	2	3	2	5000	3	1152	1152	2																21097.5	4	5378	5515.55	2	42195	4	12300	12448.8	2	45	0	1	30	208.054	203.983
1357	1	42	18.402					2	3	0	3	1	1						10000	4	2005	2036.88	2											21097.5	4	4385	4476.02	2						50	1	0	43
1358	1	28	23.569	1	1	1	1	2	4	0	2	2	2						10000	3	5640	5640	4											21097.5	3	5280	5280	1	42195	2	13680	13613.5	2	60	0	0	35
1359	1	35	25.2478					2	4	0	2	2	3						10000	3	2835	2835	3											21097.5	2	6191	6130.56	1						35	0	0	30
1360	1	34	24.8485					2	5	1	2	3	1	5000	4	1892	1909.18	2	10000	3	3960	3960	2																					6	0	0	20
1361	1	45	22.6817					1	2	1	2	3	1	5000	2	1916	1836.52	2																21097.5	3	9409	9409	2						36	0	0	22
1362	1	23	26.8278					3	7	0	2	3	2	5000	3	1627	1627	3						8045	2	2970	2855.15	3																15	0	0	8
1363	1	26	24.5511					2	3	0	2	1	1	5000	3	1313	1313	2	10000	3	2710	2710	1											21097.5	2	6183	6122.71	1						30	0	0	25
1364	1	22	25.6803	1				1	2	0	2	3	1						10000	3	3308	3308	4																42195	4	16330	16593.3	3	23	0	0	10	281.86
1365	1	36	28.0584					2	3	0	2	3	2	5000	3	1470	1470	2																21097.5	3	7110	7110	1						30	0	0	18
1366	1	27	25.2319	1	1			2	4	1	2	2	2																					21097.5	2	6840	6766.3	2	42195	2	14700	14623.2	2	45	0	0	25
1367	1	47	29.8836					2	5	0	2	1	1	5000	3	1830	1830	2	10000	3	3630	3630	2																					7	0	1	13
1368	1	29	27.8764					2	5	1	1	2	1																16090	4	8281	8903.31	3	21097.5	3	9580	9580	2						22	1	0	15
1369	1	30	23.3742	1	1			1	2	1	2	3	1																					21097.5	4	6471	6671.18	2	42195	4	13530	13710.2	1	60	0	1	50	235.657
1370	1	33	23.4918					2	5	0	2	2	2						10000	3	2290	2290	3											21097.5	2	5355	5309.72	3						45	0	0	30
1371	1	38	28.8543					2	3	0	2	2	1	5000	4	1494	1504.69	1	10000	2	3284	3257.73	1	8045	2	2682	2588	1																40	0	1	32
1372	1	34	27.4972					1	2	0	2	1	1	5000	4	1680	1693.53	3						8045	4	2880	3049.19	3																4	0	0	8
1373	1	29	25.1651	1	1			3	6	0	2	2	2																					21097.5	2	5369	5323.48	1	42195	2	12508	12452.4	2	60	0	1	50
1374	1	40	27.4583					3	7	0	2	1	1	5000	3	1625	1625	1						8045	3	2807	2807	2																20	0	0	12
1375	1	25	22.5183	1	1			2	5	0	1	3	1																					21097.5	3	3957	3957	2	42195	3	8447	8447	2	125	1	1	95	140.931
1376	1	37	28.1903					2	4	1	2	3	1						10000	3	3760	3760	2											21097.5	3	8214	8214	2						12	0	1	16
1377	1	22	24.099					2	4	0	2	3	2	5000	4	1073	1078.5	1	10000	2	2280	2267.31	2											21097.5	4	4945	5061.05	1						15	1	1	40
1378	1	35	28.4444					2	3	0	2	2	1	5000	3	1408	1408	3																21097.5	2	6606	6537.23	4						20	0	0	18
1379	1	30	23.9192	1	1	1	1	2	3	0	1	1	1	5000	3	1165	1165	2																21097.5	3	5761	5761	2	42195	4	13392	13568.6	2	40	0	0	20
1380	1	33	20.8996					3	7	1	2	3	1	5000	2	1246	1211.89	1	10000	5	2487		1											21097.5	3	5955	5955	2						45	0	1	40
1381	1	35	20.2415	1	1	1	1	1	2	1	2	1	1											8045	2	1899	1851.38	2						21097.5	4	5098	5221.44	2	42195	2	10610	10570	2	65	0	0	60
1382	1	48	20.7545					2	3	0	2	1	1	5000	3	1155	1155	2											16090	3	4650	4650	2											11	0	1	15
1383	1	19	23.1205					2	5	0	1	1	2	5000	3	1086	1086	1																21097.5	3	5214	5214	2						48	1	0	32
1384	1	41	28.3404					1	2	1	2	3	1	5000	2	1860	1785	2											16090	4	6224	6569.1	2											20	1	0	20
1385	1	32	19.3794	1		1		2	4	0	3	2	1	5000	4	1110	1115.89	2											16090	4	3820	3947.27	2						42195	3	12158	12158	2	35	0	0	30
1386	1	35	22.9134	1				3	7	0	1	2	2	5000	4	1080	1085.58	2																					42195	4	11100	11221	2	80	1	1	37
1387	1	29	22.3122					1	2	0	2	1	2	5000	3	1429	1429	2	10000	3	3330	3330	2											21097.5	2	6076	6017.77	2						25	0	1	18
1388	1	27	20.202					2	3	1	2	1	1						10000	2	3130	3106.12	1											21097.5	3	7007	7007	1						17	1	1	13
1389	1	40	20.0549					2	4	1	2	3	1						10000	3	2970	2970	4	8045	4	2550	2681.75	4																20	0	0	20
1390	1	41	19.7405	1	1			1	2	1	2	3	1																					21097.5	3	6120	6120	2	42195	3	12713	12713	2	70	0	1	45	221.321
1391	1	60	24.1753					1	1	0	1	1	2						10000	2	3550	3519.32	2											21097.5	2	7357	7271.8	2						10	0	0	19
1392	1	29	27.4961	1	1	1	1	1	2	1	2	1	1						10000	3	3540	3540	2											21097.5	4	7980	8286.64	2	42195	3	18180	18180	2	30	0	1	20
1393	1	42	21.9886					2	3	1	2	2	1	5000	4	1535	1546.29	2	10000	3	3256	3256	2											21097.5	2	7457	7369.49	2						30	0	1	25
1394	1	34	25.2525	1		1		3	7	0	2	2	1						10000	3	2140	2140	2	8045	4	1663	1718.04	2											42195	4	10550	10659.3	1	65	1	1	55
1395	1	33	23.1481					2	4	0	2	2	1	5000	4	1079	1084.57	1											16090	4	3711	3831	1											45	1	1	45
1396	1	31	22.3122	1				3	6	0	2	1	1	5000	4	1156	1162.39	1																21097.5	1	5400		1	42195	4	12084	12227.6	2	59	1	1	50
1397	1	41	26.732	1				1	2	0	2	1	1																16090	4	3860	3990	2	21097.5	5	5301		1	42195	4	11294	11419.3	1	64	1	1	50
1398	1	54	26.738					2	3	0	2	1	1	5000	4	1323	1331.38	2						8045	2	2230	2164.62	2																36	0	0	30
1399	1	29	25.2048	1	1			1	1	0	2	2	3																					21097.5	2	6180	6119.77	2	42195	4	13080	13248.4	2	40	0	1	30
1400	1	24	22.3621	1	1			1	2	0	2	3	2																					21097.5	4	6165	6346.43	1	42195	4	15042	15265.1	2	35	0	1	25	238.253
1401	1	36	23.6772					2	3	0	2	2	1																16090	4	3580	3691.55	2	21097.5	4	4736	4842.35	2						95	1	1	80
1402	1	36	21.3859	1	1	1	1	1	2	1	1	1	1	5000	3	1620	1620	2																21097.5	3	7501	7501	2	42195	2	17310	17203.7	2	40	0	0	30
1403	1	35	29.2178	1	1	1	1	1	1	1	2	3	3						10000	3	3537	3537	2											21097.5	3	8310	8310	3	42195	2	19545	19409.5	2	26	1	1	19	306.896	307.778
1404	1	26	21.4646	1	1	1	1	1	2	0	2	2	1						10000	4	2324	2366.94	2											21097.5	4	5102	5225.63	1	42195	4	11301	11426.5	1	62	0	1	50
1405	1	60	22.4467	1	1			2	3	0	2	1	1																					21097.5	4	5430	5570.26	2	42195	2	13890	13821.5	2	40	1	1	30
1406	1	35	22.9134	1	1	1	1	2	5	0	1	2	2	5000	4	1260	1267.6	1																21097.5	3	6000	6000	3	42195	3	12900	12900	2	40	1	1	30
1407	1	27	25.0438					1	2	1	2	1	2	5000	3	1648	1648	1						8045	4	2629	2769.26	1	16090	2	6588	6321.22	2											19	0	0	13
1408	1	41	23.6772	1		1		2	3	0	2	1	1						10000	3	2376	2376	2						16090	2	3792	3702.07	1						42195	4	11100	11221	1	60	1	0	50
1409	1	28	23.9702					3	7	1	2	2	3																16090	4	5878	6184.86	3	21097.5	3	7941	7941	2						20	1	0	16
1410	1	26	22.1946	1	1			1	1	1	2	2	1																					21097.5	2	6900	6825.01	2	42195	3	15600	15600	2	37	1	0	30
1411	1	22	21.9886					2	3	1	2	3	1	5000	3	1564	1564	2	10000	4	3154	3233.62	2											21097.5	4	8021	8330.86	2						27	0	0	17
1412	1	49	23.4508	1	1	1	1	2	3	0	2	3	1						10000	2	2555	2539.07	2											21097.5	3	5537	5537	2	42195	3	11936	11936	1	50	1	1	40	204.871	204.244
1413	1	36	28.4091	1	1	1	1	1	2	1	2	3	2																16090	3	6607	6607	2	21097.5	3	8866	8866	2	42195	3	19827	19827	2	43	0	0	25	319.074	329.629
1414	1	33	25.1651					2	4	1	2	2	3	5000	3	1557	1557	2																21097.5	3	7838	7838	3						30	0	0	15
1415	1	23	20.5857					2	3	0	2	3	1	5000	4	950	954.312	1	10000	4	2167	2204.29	2																					65	0	0	40
1416	1	26	25.5979					2	5	0	2	2	3	5000	4	1510	1520.92	3																21097.5	3	7800	7800	3						20	0	0	20
1417	1	37	20.5576	1	1	1	1	2	3	0	1	3	1						10000	3	2048	2048	2											21097.5	3	4456	4456	2	42195	4	9468	9555.92	1	90	1	1	80	159.065	158.146
1418	1	28	22.3776	1		1		2	3	1	2	1	2	5000	3	1350	1350	2											16090	3	4740	4740	2						42195	3	15430	15430	2	30	1	1	25
1419	1	23	20.8117					2	3	1	2	2	1	5000	3	1326	1326	2																21097.5	3	6169	6169	2						45	0	0	35
1420	1	37	23.9234	1	1			2	5	0	1	1	1																					21097.5	4	5701	5855.81	2	42195	3	12660	12660	2	35	0	1	28
1421	1	26	24.099					1	2	1	2	2	1	5000	4	1622	1634.61	1											16090	3	5639	5639	1	21097.5	3	7345	7345	1						35	1	0	20
1422	1	56	27.9544					1	2	0	2	2	1	5000	3	1698	1698	1																21097.5	3	8087	8087	1						31	0	0	22
1423	1	31	23.7926					2	3	1	2	1	1	5000	2	2309	2194.54	3						8045	2	3374	3226.56	2																5	0	0	5
1424	1	36	27.9035					2	5	0	2	2	1	5000	3	1397	1397	2	10000	3	3075	3075	3						16090	3	4989	4989	3											20	0	0	10
1425	1	46	29.8836					2	5	0	2	2	2						10000	3	3441	3441	2											21097.5	3	7456	7456	2						28	1	1	20
1426	1	27	24.543					2	5	1	2	3	2	5000	2	2017	1929.11	2											16090	2	7627	7271.71	1											15	0	1	12
1427	1	23	22.3776	1	1	1	1	1	1	1	2	2	1	5000	3	1330	1330	3																21097.5	2	6480	6413.81	1	42195	4	14460	14666.1	2	50	0	0	45
1428	1	41	25.9689					2	4	0	2	2	1	5000	3	1523	1523	1						8045	2	2592	2504.1	1																20	1	0	15
1429	1	39	25.2869					1	2	1	2	3	1																16090	2	5033	4875.79	1	21097.5	2	6736	6664.51	1						35	1	1	32
1430	1	43	23.154	1		1		1	1	0	1	1	1	5000	2	1265	1229.86	2											16090	2	4620	4487.19	3						42195	2	15120	15038.8	2	45	1	1	35
1431	1	34	29.263					1	2	1	2	3	1						10000	4	4562	4730.47	1						16090	3	7003	7003	1											16	0	0	15
1432	1	26	29.6846					2	5	0	2	2	2	5000	2	1530	1478.89	3											16090	1	5860		2	21097.5	2	7680	7587.21	2						28	1	1	25
1433	1	28	20.4467	1		1		1	1	0	2	1	1						10000	3	1935	1935	1						16090	4	3153	3239.21	1						42195	3	8966	8966	1	115	0	1	95
1434	1	37	20.198					2	3	0	2	2	1	5000	5	997		2											16090	4	3414	3515.3	1	21097.5	2	4580	4546.84	1						65	1	1	55
1435	1	23	24.3787					2	5	0	2	2	1	5000	3	1380	1380	4	10000	3	3120	3120	3																					5	0	0	14
1436	1	36	23.808					1	2	1	2	1	1											8045	3	2810	2810	2	16090	3	5831	5831	2											18	0	0	15
1437	1	36	22.1661	1				2	3	0	2	3	1	5000	4	1071	1076.48	1																					42195	4	10752	10865.5	1	60	1	1	50	184.827
1438	1	39	21.9138	1				1	1	0	1	1	1						10000	2	2630	2613.12	3																42195	4	12574	12729.5	2	60	0	0	45
1439	1	55	22.5183	1	1	1	1	2	4	0	2	3	1						10000	4	2585	2638.24	3											21097.5	3	5592	5592	2	42195	2	12752	12694.2	2	38	0	1	28	211.446	210.021
1440	1	31	25.7117					2	4	1	2	3	1	5000	3	1675	1675	2	10000	3	3455	3455	2											21097.5	3	7788	7788	3						25	0	0	21
1441	1	48	29.6347					2	5	0	2	2	3																16090	4	5280	5526.29	2	21097.5	4	6862	7087.53	2						35	1	0	23
1442	1	27	23.9234					2	3	0	2	2	1						10000	3	2765	2765	2						16090	3	4710	4710	2	21097.5	3	6690	6690	2						37	0	0	30
1443	1	29	22.2222	1				2	5	1	2	1	1											8045	4	1910	1982.97	2						21097.5	1	5430		1	42195	2	11276	11230.8	2	73	0	1	70
1444	1	24	21.1901					2	4	1	2	1	2																16090	3	5227	5227	2	21097.5	4	6856	7081.12	1						24	0	1	18
1445	1	32	18.3995	1		1		2	3	0	2	2	3	5000	4	1003	1007.81	2	10000	4	2160	2197.05	2																42195	2	9848	9813.49	2	70	1	1	55
1446	1	47	25.6631					1	1	1	2	1	1	5000	3	1888	1888	2																21097.5	4	9300	9719.14	1						20	1	1	15
1447	1	61	25.2048					2	4	0	2	1	1						10000	2	3066	3043.09	3	8045	2	2549	2463.94	3																27	1	0	25
1448	1	30	24.209	1	1			2	5	0	3	1	1																					21097.5	3	8176	8176	2	42195	3	20591	20591	2	35	0	0	30
1449	1	27	20.0617					2	4	0	1	3	1						10000	3	2578	2578	3						16090	4	4142	4292.06	2											25	0	0	20
1450	1	36	26.4193					2	4	0	2	3	1						10000	3	3045	3045	2											21097.5	3	6803	6803	2						35	1	1	30
1451	1	37	22.9048	1	1	1	1	1	2	1	2	1	1	5000	4	1172	1178.57	1																21097.5	3	5473	5473	1	42195	2	11627	11578.9	1	51	1	1	45
1452	1	41	21.8612	1	1			2	3	1	2	1	1																					21097.5	4	5964	6133.63	2	42195	3	13322	13322	1	67	1	1	55
1453	1	35	24.9748					2	3	0	2	1	1											8045	2	2325	2254.02	2						21097.5	4	6165	6346.43	2						40	0	1	40
1454	1	47	28.1329					3	6	0	2	1	1						10000	3	2970	2970	2											21097.5	3	6600	6600	2						30	0	0	23
1455	1	46	22.017					2	5	1	2	3	3	5000	3	1560	1560	3											16090	2	5160	4994.89	3	21097.5	4	6470	6670.12	3						13	0	0	9
1456	1	36	22.0195					1	2	0	2	1	1	5000	4	1429	1438.78	1																21097.5	2	7509	7420.27	2						23	1	1	15
1457	1	33	18.0339	1	1	1	1	2	5	0	2	3	1	5000	4	1120	1126	2																21097.5	3	5124	5124	1	42195	3	11009	11009	1	65	1	1	50	188.038	186.919
1458	1	34	22.3776					2	4	1	2	2	1						10000	3	3240	3240	3											21097.5	2	7440	7352.88	2						30	0	1	25
1459	1	38	33.7358	1	1	1	1	1	1	1	2	1	1	5000	3	1554	1554	1																21097.5	3	7200	7200	1	42195	2	16258	16164.2	1	40	1	1	30
1460	1	28	23.2939	1				2	3	0	2	1	1	5000	5	930		1	10000	3	2070	2070	2																42195	4	10839	10954.4	2	65	0	1	50
1461	1	57	25.5288	1		1		2	4	0	1	3	1											8045	3	2241	2241	1	16090	4	4480	4656.06	1						42195	2	13155	13093.5	1	64	1	0	55	219.971	229.007
1462	1	24	22.3776	1	1	1	1	1	1	1	2	3	1						10000	3	3017	3017	3											21097.5	2	6793	6720.3	2	42195	2	16000	15909.1	2	44	0	0	40	242.359	246.733
1463	1	45	20.8117	1	1	1	1	1	1	1	2	1	2											8045	4	2400	2516.35	4						21097.5	3	6480	6480	3	42195	2	13620	13554.1	2	40	0	0	35
1464	1	56	23.0141					3	7	0	1	1	1	5000	4	1155	1161.38	2											16090	3	4105	4105	2	21097.5	4	5460	5601.83	2						50	1	1	35
1465	1	25	23.0834	1	1	1	1	2	3	0	1	1	2						10000	2	2515	2499.56	3											21097.5	3	5430	5430	3	42195	3	14160	14160	4	50	1	1	40
1466	1	23	21.0005					2	3	1	2	1	2											8045	3	2942	2942	2	16090	3	5848	5848	2											28	0	0	7
1467	1	28	24.6259					2	3	0	2	3	1	5000	4	1291	1298.98	2																21097.5	4	6257	6443.97	2						55	0	0	35
1468	1	50	24.441					2	5	0	2	2	1	5000	3	1189	1189	2						8045	3	1973	1973	2						21097.5	3	5629	5629	2						30	1	1	21
1469	1	55	20.2515	1	1	1	1	2	3	0	1	1	2	5000	4	1054	1059.31	2																21097.5	3	4805	4805	2	42195	2	10984	10941.1	2	60	0	0	45
1470	1	33	25.9689	1		1		1	2	0	2	2	1	5000	4	1411	1420.53	2											16090	4	4310	4472.71	2						42195	3	12510	12510	2	47	1	1	40
1471	1	27	27.5421	1	1	1	1	1	1	1	2	1	3						10000	3	3691	3691	2											21097.5	3	8959	8959	1	42195	2	20967	20811.2	2	40	0	0	30
1472	1	30	23.7477					1	2	0	2	1	1	5000	4	1320	1328.34	2	10000	4	2880	2946.24	2																					25	0	1	18
1473	1	50	24.5262					2	4	0	2	1	1	5000	3	1190	1190	3	10000	2	2610	2593.38	3											21097.5	3	5700	5700	3						30	1	1	25
1474	1	34	31.2721					1	1	1	3	2	2	5000	4	2520	2550.57	2																21097.5	3	10920	10920	2						26	0	0	20
1475	1	37	28.0584	1	1	1	1	1	1	1	3	1	3	5000	2	1621	1563.74	3																21097.5	3	7547	7547	2	42195	3	19326	19326	2	40	1	1	30
1476	1	33	23.3717					2	4	0	1	2	1	5000	3	1500	1500	2						8045	3	2700	2700	2																40	0	0	40
1477	1	36	24.5654					2	3	0	2	3	1	5000	3	1068	1068	3	10000	3	2247	2247	3	8045	2	1807	1763.83	3																27	0	1	20
1478	1	47	24.57	1	1	1	1	2	5	0	2	3	2	5000	3	1139	1139	2																21097.5	3	5322	5322	2	42195	4	12640	12797.2	2	55	0	0	40	197.849	195.456
1479	1	32	24.7028	1				3	7	0	1	3	3	5000	4	1102	1107.81	2	10000	1	2226		3																42195	2	11296	11250.6	1	42	1	1	37	193.871
1480	1	36	20.8699	1	1			1	1	1	1	2	3																					21097.5	3	5750	5750	2	42195	3	12115	12115	2	63	1	1	50
1481	1	32	21.3707	1	1	1	1	1	1	1	2	1	1	5000	2	1286	1249.7	1																21097.5	4	5826	5987.77	1	42195	4	12795	12956.1	1	74	1	1	62
1483	1	23	23.1205					1	1	1	2	1	1	5000	3	1201	1201	1											16090	2	5234	5064.2	2	21097.5	2	6438	6372.67	2						35	1	0	33
1484	1	44	37.0649					1	1	1	2	3	3	5000	2	2014	1926.36	1						8045	2	4340	4099.06	2						21097.5	4	11260	11880.3	3						22.6	0	0	2
1485	1	39	21.8612	1	1	1	1	2	3	1	2	1	1	5000	3	1347	1347	2																21097.5	3	6480	6480	2	42195	2	14400	14326.3	2	40	0	1	30
1486	1	50	25.0886					3	7	1	2	1	3	5000	3	1638	1638	4																21097.5	3	7682	7682	4						23	0	0	20
1487	1	60	22.1497	1	1			1	1	0	2	3	1																					21097.5	4	6450	6648.86	1	42195	4	14460	14666.1	2	56	0	1	50	234.995
1488	1	24	21.3068	1	1	1	1	2	3	1	1	1	3	5000	4	1268	1275.69	2																21097.5	4	6300	6489.59	3	42195	4	13305	13479.3	2	40	1	1	35
1489	1	32	22.3776	1	1	1	1	2	4	1	2	1	1						10000	4	2634	2689.3	1											21097.5	3	5850	5850	1	42195	3	12971	12971	1	80	1	1	60
1490	1	29	20.0371					2	4	0	1	1	1	5000	5	993		2	10000	2	2150	2138.71	2	8045	4	1639	1692.44	2																75	1	1	60
1491	1	38	29.2184					3	6	0	2	1	1						10000	3	2646	2646	1						16090	3	4500	4500	2	21097.5	3	6000	6000	2						25	1	1	20
1492	1	47	25.974	1	1			1	2	0	1	1	1																					21097.5	4	5714	5869.52	3	42195	2	12466	12410.8	3	55	1	0	35
1493	1	39	24.3787					2	5	0	2	2	1	5000	3	1184	1184	2	10000	3	2533	2533	2											21097.5	3	5547	5547	2						100	0	0	50
1494	1	30	18.9197					1	2	1	2	2	3	5000	4	1565	1576.74	2	10000	3	3420	3420	3																					6	0	1	5
1495	1	41	22.1497					3	8	0	1	3	2	5000	4	1030	1035.07	1						8045	2	1825	1780.98	2	16090	3	3716	3716	2											30	1	0	20
1496	1	17	19.2003					1	2	1	2	3	1	5000	2	1275	1239.31	1											16090	4	5160	5394.97	1											28	0	0	25
1497	1	36	23.8048					3	6	0	2	1	1	5000	4	1313	1321.25	2											16090	3	4442	4442	2											15	0	0	10
1498	1	22	21.3333					3	8	0	1	2	2	5000	3	863	863	1						8045	3	1476	1476	1																100	1	1	50
1499	1	51	23.3371	1	1			2	3	0	2	1	1																					21097.5	3	6690	6690	2	42195	4	14709	14922.3	1	55	1	1	45
1500	1	41	26.3795	1	1			1	1	1	1	2	1																					21097.5	3	9480	9480	2	42195	4	19800	20188.4	2	25	0	0	20
1501	1	35	23.2323					2	4	1	2	1	2	5000	3	1800	1800	3																21097.5	3	7794	7794	2						12	0	0	20
1502	1	47	35.4605					1	2	0	2	3	1						10000	4	3241	3325.13	2											21097.5	3	7296	7296	2						36	0	0	20
1503	1	32	35.073					2	5	0	1	1	1	5000	3	1684	1684	3	10000	4	3720	3831.26	2																					20	1	1	15
1504	1	32	19.1555					2	4	1	2	3	3	5000	2	1542	1490.1	3	10000	5	2820		2											21097.5	4	6780	7000.08	1						40	1	1	30
1505	1	40	23.883					2	5	0	2	3	1	5000	4	1215	1222.06	1																21097.5	3	5840	5840	1						30	1	1	20
1506	1	50	23.0057	1	1	1	1	1	2	0	1	2	2						10000	2	2358	2344.42	2											21097.5	3	4965	4965	1	42195	3	10563	10563	1	62	1	1	60
1507	1	36	19.5918					3	7	0	1	3	1						10000	3	2400	2400	1											21097.5	4	5281	5413.57	2						21	0	1	18
1508	1	64	24.3787	1	1	1	1	1	1	0	2	3	1						10000	3	2728	2728	2											21097.5	3	6150	6150	2	42195	2	13397	13333.2	2	62	0	0	50	220.019	223.006
1509	1	62	23.5826					1	2	0	1	2	1	5000	3	1500	1500	3																21097.5	2	6480	6413.81	3						35	1	1	30
1510	1	41	26.749					2	4	0	1	1	1	5000	3	1285	1285	2						8045	3	2223	2223	2						21097.5	3	5865	5865	2						35	1	1	20
1511	1	31	18.6994	1		1		3	7	1	2	1	1	5000	4	1386	1395.2	2	10000	4	2881	2947.29	2																42195	3	16497	16497	2	56	0	1	40
1512	1	28	22.2635					3	6	0	2	1	1	5000	2	1058	1033.31	1	10000	3	2301	2301	2											21097.5	3	5178	5178	2						30	1	1	20
1513	1	27	21.5213					3	6	0	2	2	1	5000	2	970	949.202	1						8045	1	1655		3						21097.5	4	4485	4580.26	2						51.6	1	1	47
1514	1	29	23.821	1	1	1	1	2	5	1	1	3	2	5000	3	1130	1130	1																21097.5	4	5530	5675.54	3	42195	2	11646	11597.8	2	60	1	1	45	207.377	205.714
1515	1	33	21.0724					1	2	1	1	1	1	5000	2	1078	1052.37	2																21097.5	3	4857	4857	1						60	1	1	50
1516	1	51	31.8451	1				1	1	0	2	2	1	5000	4	1489	1499.62	3																					42195	2	16330	16235.3	2	30	0	0	20
1517	1	25	22.6263					2	4	0	1	1	1						10000	4	2641	2696.6	2											21097.5	4	5778	5937.07	2						30	0	0	25
1518	1	40	21.0724					2	4	1	1	2	1	5000	3	1400	1400	1																21097.5	3	6915	6915	2						32	1	1	27
1519	1	30	20.419					2	4	1	1	2	1						10000	2	2500	2484.75	2	8045	2	1898	1850.43	2						21097.5	1	5484		2						40	1	1	25
1520	1	39	22.7087	1	1	1	1	2	5	0	2	1	2						10000	3	2627	2627	1											21097.5	3	5883	5883	1	42195	3	12936	12936	1	51	0	1	45
1521	1	24	23.5923	1				1	1	0	1	3	3																16090	3	3572	3572	3	21097.5	1	4622		1	42195	2	9937	9901.87	2	74	1	1	55	175.311
1522	1	53	23.1481	1				2	4	0	2	2	1											8045	3	1960	1960	2											42195	2	12220	12166.9	2	55	1	1	40
1523	1	44	26.0943					1	1	0	2	2	2	5000	3	1364.5	1364.5	2																21097.5	3	6331	6331	2						50	1	1	30
1524	1	46	22.8676	1	1	1	1	2	4	0	2	2	2																16090	4	3575	3686.23	1	21097.5	4	4820	4930.19	1	42195	4	10309	10413.3	1	90	0	0	70
1525	1	27	24.099	1	1			1	2	1	1	2	2																					21097.5	3	6420	6420	3	42195	3	13860	13860	2	45	0	0	35
1526	1	33	26.738					3	7	0	2	3	1	5000	2	1338	1298.75	1	10000	3	2913	2913	1	8045	4	2298	2404.45	1																14	0	1	12
1528	1	33	21.5213	1		1		1	2	1	2	1	1	5000	3	1680	1680	3	10000	4	3420	3513.82	2																42195	4	15780	16025.7	1	40	0	0	35
1529	1	29	24.209	1	1	1	1	3	6	1	1	3	1						10000	3	2896	2896	1											21097.5	2	6420	6355.03	1	42195	2	14131	14060.1	1	75	1	1	55	223.905	230.687
1530	1	18	21.0747					2	4	0	1	2	1	5000	3	1110	1110	2	10000	2	2580	2563.76	4																					28	0	1	15
1531	1	58	25.1651					2	3	0	2	1	1	5000	4	1207	1213.97	2																21097.5	2	6007	5950.08	2						30	1	1	25
1532	1	40	23.0056	1	1	1	1	1	2	0	2	3	1	5000	3	1059	1059	3																21097.5	3	4950	4950	2	42195	3	11100	11100	3	70	1	0	60	179.459	178.267
1533	1	49	23.9702					2	3	0	2	3	1											8045	3	2141	2141	2	16090	3	4747	4747	2											33	0	1	28
1534	1	37	19.5528	1	1	1	1	3	6	0	2	3	1						10000	3	2408	2408	4											21097.5	4	5227	5356.84	3	42195	4	10834	10949.3	1	84	1	1	70	188.702	191.046
1535	1	48	19.1761					2	3	1	1	1	1	5000	3	1240	1240	3	10000	3	2635	2635	3																					40	1	0	35
1536	1	34	22.9134					1	2	1	2	3	1						10000	3	4044	4044	3	8045	3	3128	3128	2						21097.5	3	9005	9005	2						22	0	0	15
1537	1	52	18.9554	1	1	1	1	1	2	1	2	3	1	5000	3	1741	1741	1																21097.5	3	8123	8123	1	42195	3	17283	17283	1	55	0	0	40	284.412	298.376
1538	1	30	25.1119	1	1	1	1	3	8	0	1	2	1	5000	4	1107	1112.86	1																21097.5	3	5063	5063	1	42195	2	11280	11234.8	1	50	1	0	47
1539	1	25	23.154					1	2	0	1	2	1	5000	3	1120	1120	2	10000	4	2290	2331.68	1											21097.5	2	5280	5235.97	2						55	1	1	50
1540	1	62	24.4314					1	1	1	2	3	3	5000	4	2280	2305	2																21097.5	2	10800	10617.4	2						35	0	0	25
1541	1	18	20.8162					2	3	0	1	2	1	5000	2	1141	1112.33	1											16090	3	4200	4200	3											15	1	1	10
1542	1	33	20.4841	1	1	1	1	2	4	1	2	1	1						10000	3	2720	2720	2											21097.5	3	6099	6099	2	42195	3	12837	12837	2	56	0	1	40
1543	1	44	26.738	1				2	3	0	2	1	2						10000	1	3720		3	8045	3	2835	2835	2											42195	3	14760	14760	2	24	0	0	35
1544	1	38	28.3108					1	1	1	2	2	1	5000	3	1402	1402	2	10000	3	2790	2790	2																					30	0	0	25
1545	1	32	23.2383					3	7	1	2	1	1	5000	2	1630	1572.12	2																21097.5	2	8145	8040.71	2						20	0	1	15
1546	1	33	23.2007	1		1		3	7	0	2	3	1						10000	3	2157	2157	1						16090	3	3721	3721	2						42195	4	10229	10331.7	1	87	1	1	65	178.689	176.794
1547	1	53	25.6772					2	4	0	2	2	1	5000	3	1307	1307	2																21097.5	2	6332	6268.79	2						14	1	0	35
1548	1	48	24.5028					2	5	1	2	1	1	5000	2	1380	1338.28	2																21097.5	2	6900	6825.01	2						32	1	0	20
1549	1	45	21.5213					1	2	0	2	2	1						10000	3	2301	2301	1											21097.5	2	5376	5330.37	1						45	1	1	30
1550	1	40	20.419	1	1			2	3	1	2	3	1																					21097.5	4	6083	6259.57	2	42195	4	13110	13279.2	2	70	0	0	60	218.874
1551	1	38	22.1497	1				1	1	0	2	1	1	5000	4	1124	1130.04	1																					42195	4	10751	10864.5	1	60	1	1	45
1552	1	41	25.3777					3	6	0	2	2	1	5000	3	2172	2172	4	10000	3	3336	3336	4																					0	0	0	0
1553	1	24	25.2478					3	7	0	2	3	1	5000	4	1223	1230.16	4																21097.5	4	5731	5887.46	2						35	1	1	25
1554	1	38	20.19	1	1			2	5	1	2	2	2																					21097.5	4	5275	5407.27	2	42195	3	11226	11226	1	64	1	1	55
1555	1	29	21.6221					2	3	1	2	2	1	5000	3	1684	1684	4																21097.5	2	6313	6250.17	2						20	0	0	15
1556	1	31	22.7912	1	1	1	1	3	6	0	1	2	1	5000	3	1035	1035	2																21097.5	3	4673	4673	2	42195	2	10395	10356.6	2	72	1	1	50
1557	1	42	31.7222	1	1	1	1	1	1	1	2	3	2	5000	4	1990	2009.02	2																21097.5	2	9840	9688.19	3	42195	3	22860	22860	2	35	0	0	20	349.512	361.522
1558	1	47	23.7093	1	1	1	1	2	3	0	2	1	3	5000	4	1318	1326.31	1																21097.5	2	6562	6494.14	1	42195	2	14122	14051.2	1	33	0	1	27
1559	1	40	25.5103					1	1	0	2	1	1						10000	3	3300	3300	2											21097.5	4	8520	8870.46	2						25	1	1	20
1560	1	34	19.8583	1				2	4	1	2	1	1	5000	3	1402	1402	2																					42195	3	17700	17700	2	50	0	1	40
1561	1	30	25.3803					3	7	0	1	1	1	5000	4	1396	1405.33	2	10000	2	3150	3125.82	1																					17	1	1	13
1562	1	34	22.4552	1	1	1	1	1	1	0	2	3	1						10000	4	2101	2136.04	2											21097.5	3	4706	4706	2	42195	3	9696	9696	1	20	1	1	45	175.933	172.354
1563	1	47	25.922	1	1			2	3	0	1	2	2																					21097.5	4	5629	5779.87	3	42195	2	11968	11917.1	2	50	1	1	35
1564	1	35	18.9349					2	4	1	2	1	1	5000	3	1350	1350	2	10000	2	2845	2825.26	3						16090	4	4660	4850.8	1											30	0	0	30
1565	1	34	24.0421	1				1	2	1	2	1	3																16090	4	5420	5679.84	2						42195	3	17760	17760	2	51	0	0	34
1566	1	36	23.8158					2	3	1	2	2	1	5000	3	1667	1667	1	10000	3	3915	3915	2											21097.5	3	8520	8520	2						11	1	0	23
1567	1	42	19.4767	1	1	1	1	2	3	1	2	3	1						10000	3	3240	3240	2											21097.5	3	6900	6900	3	42195	3	13800	13800	2	50	0	0	45	245.112	254.61
1568	1	42	27.4961	1	1	1	1	2	3	0	2	1	1	5000	4	1546	1557.45	2																21097.5	2	7444	7356.79	2	42195	2	16020	15928.9	2	30	0	0	25
1569	1	37	22.9048					1	2	1	2	2	1	5000	3	1400	1400	1	10000	3	3010	3010	2											21097.5	4	6439	6637.18	1						37	0	0	27
1570	1	31	22.4769	1	1	1	1	1	2	1	2	3	2						10000	4	2872	2937.87	2											21097.5	3	6084	6084	2	42195	3	13610	13610	1	42	0	1	30	227.053	229.227
1571	1	25	23.3742	1	1	1	1	2	3	1	2	1	1	5000	4	1100	1105.79	1																21097.5	2	6300	6237.42	1	42195	3	12900	12900	1	24	1	0	55
1572	1	30	23.883	1	1	1	1	1	2	0	2	1	1	5000	4	1180	1186.66	1																21097.5	3	5400	5400	1	42195	3	11700	11700	1	32	0	0	26
1573	1	32	17.7557	1	1			2	4	1	1	2	3	5000	1	1154		1																21097.5	2	5368	5322.5	2	42195	3	10923	10923	1	60	1	0	55
1574	1	28	22.0348	1	1	1	1	2	3	0	2	1	1						10000	2	3210	3184.89	3											21097.5	4	6846	7070.46	2	42195	4	17185	17476.8	1	32	1	1	25
1575	1	45	22.1497					1	2	0	1	2	1	5000	2	1120	1092.36	2																21097.5	3	4926	4926	2						65	1	1	50
1576	1	43	29.1765					3	6	0	2	2	1						10000	4	3325	3413.61	3											21097.5	4	7355	7614.71	2						30	1	1	22
1577	1	35	25.5979					2	5	1	2	3	1	5000	4	1518	1529.04	2	10000	1	3565		2											21097.5	2	8340	8230.69	3						18	0	1	12
1578	1	43	21.0724					2	3	1	2	1	2	5000	3	1658	1658	2	10000	3	3482	3482	2											21097.5	2	7972	7872.06	2						34	1	1	25
1579	1	27	21.2079	1		1		3	8	0	2	2	2	5000	4	1110	1115.89	2											16090	4	4566	4749.03	2						42195	2	13747	13679.9	3	45	0	1	20
1580	1	35	25.6534					3	7	1	2	2	3	5000	3	1477	1477	2	10000	2	3260	3234.11	3											21097.5	2	7137	7056.8	2						43	1	1	35
1581	1	45	23.6403	1				2	3	0	1	1	1																16090	2	3731	3643.91	1						42195	4	10595	10705.2	1	110	1	1	80
1582	1	48	26.732					2	3	0	2	2	1	5000	4	1390	1399.25	1	10000	4	3107	3184.24	1											21097.5	2	7153	7072.44	1						27	0	0	22
1583	1	46	24.9685	1	1	1	1	2	3	0	1	3	1	5000	2	1320	1281.78	1																21097.5	4	6220	6404.73	1	42195	4	14199	14397.6	2	45	1	1	40	232.548	233.419
1584	1	67	21.5476					2	3	0	2	2	1	5000	3	1690	1690	2	10000	4	3492	3589.86	1											21097.5	2	8110	8006.6	2						30	0	0	25
1585	1	28	25.6	1	1	1	1	2	4	0	2	2	1											8045	4	2233	2333.38	1						21097.5	3	6428	6428	1	42195	3	15324	15324	2	45	0	1	30
1586	1	27	24.6259					2	3	1	2	3	2						10000	4	4080	4214.23	4											21097.5	3	7680	7680	1						30	0	0	20
1587	1	43	19.6209	1	1	1	1	2	4	0	1	2	1	5000	3	1163	1163	1																21097.5	2	5472	5424.73	1	42195	3	11642	11642	1	90	1	1	70
1588	1	51	21.7452	1	1	1	1	3	7	0	2	1	2	5000	4	1113	1118.92	1																21097.5	4	5158	5284.39	1	42195	4	10782	10896.2	2	80	1	1	50
1589	1	45	23.8048	1	1	1	1	3	7	0	2	2	1						10000	3	2582	2582	3											21097.5	3	5671	5671	1	42195	4	12662	12819.7	2	60	1	1	48
1590	1	51	18.9554					1	2	1	1	3	2	5000	2	1500	1450.84	2	10000	3	3085	3085	2											21097.5	2	6820	6746.73	2						30	1	1	26
1591	1	38	21.8359					2	5	0	2	1	1	5000	3	1014	1014	1																21097.5	2	4698	4663.11	1						79	1	1	60
1592	1	51	23.4508	1	1	1	1	1	2	0	2	3	1						10000	2	2490	2474.87	2											21097.5	3	5670	5670	2	42195	3	12504	12504	2	56	1	1	50	205.259	204.869
1593	1	38	20.7059					2	3	1	1	1	2											8045	2	2130	2070.28	2						21097.5	3	6451	6451	2						33	1	1	25
1594	1	38	28.2004	1	1			2	3	0	2	1	2																					21097.5	4	5737	5893.79	1	42195	4	11880	12018.7	2	45	0	0	35
1595	1	34	23.0056	1	1	1	1	1	1	0	2	3	1	5000	2	1048	1023.76	2																21097.5	4	4630	4731.59	1	42195	4	10750	10863.5	1	75	0	1	65	171.251	169.79
1596	1	29	27.5482					1	1	0	2	2	3	5000	3	1935	1935	2																21097.5	3	8847	8847	1						20	0	0	15
1597	1	35	24.4638					2	3	1	2	2	1																16090	4	5164	5399.34	1	21097.5	3	6946	6946	2						25	1	0	20
1598	1	31	22.5183					2	4	0	1	3	3	5000	3	1087	1087	1	10000	2	2422	2407.68	2											21097.5	2	5044	5003.81	2						34	1	1	24
1599	1	43	26.738					1	2	0	2	1	1	5000	3	1086	1086	2						8045	1	1903		3						21097.5	2	5088	5047.11	2						43	1	1	36
1600	1	28	23.9899	1	1	1	1	2	4	0	2	3	1						10000	3	2400	2400	1											21097.5	3	5285	5285	1	42195	4	11130	11251.7	1	53	1	0	45	194.884	193.58
1601	1	50	23.8496					3	6	0	2	3	1	5000	3	1440	1440	2	10000	3	3480	3480	2											21097.5	2	6300	6237.42	3						14	1	1	21
1602	1	51	26.732					2	3	0	2	1	1	5000	3	1620	1620	2	10000	3	3285	3285	3																					17	1	1	12
1603	1	38	17.1326					2	3	1	1	3	1	5000	4	1421	1430.67	2																21097.5	3	6363	6363	1						40	1	1	35
1604	1	29	21.4389					2	3	1	2	3	1	5000	2	1423	1378.68	1	10000	2	2949	2927.8	2																					33	0	0	25
1605	1	34	28.4444					2	5	0	2	3	1	5000	1	1500		2	10000	4	3000	3071.95	1											21097.5	4	7620	7899.12	3						32	1	1	25
1606	1	45	19.5165	1	1			2	3	0	2	2	1																					21097.5	2	5383	5337.25	2	42195	2	13423	13359	2	45	0	0	35
1607	1	62	23.7047					2	5	0	1	1	1	5000	3	1210	1210	2	10000	4	2515	2565.37	1	8045	2	2060	2004.09	2																8	1	1	30
1608	1	43	19.8864	1	1			1	2	1	2	2	1																					21097.5	4	6004	6175.95	2	42195	3	12909	12909	1	50	1	1	45
1609	1	34	24.441	1				3	7	0	2	3	3	5000	4	1020	1024.97	2																					42195	3	10710	10710	2	65	1	1	50	177.055
1610	1	30	21.5213	1	1	1	1	2	3	1	2	3	1	5000	3	1808	1808	3																21097.5	2	9625	9479.7	3	42195	4	19618	19999.2	2	30	1	1	25	337.758	348.66
1611	1	53	22.3064					2	5	0	1	1	1	5000	3	1143	1143	2	10000	2	2496	2480.79	2																					60	0	0	40
1612	1	45	20.334	1	1	1	1	1	1	0	2	2	3											8045	2	1662	1625.41	2						21097.5	4	4513	4609.46	2	42195	2	9930	9894.92	2	82	1	1	60
1613	1	36	21.8716					1	2	1	2	1	2	5000	3	1800	1800	3						8045	3	3300	3300	3																19	1	0	10
1614	1	49	24.7879					2	4	0	2	2	1																16090	2	5535	5345.46	1	21097.5	2	7015	6937.5	1						40	1	1	30
1615	1	61	30.1627					1	2	0	2	3	1						10000	2	4020	3980.7	3	8045	3	3016	3016	3																8	0	0	7
1616	1	33	22.086	1				2	5	1	1	3	3	5000	1	1338		2	10000	3	2960	2960	2																42195	3	12867	12867	2	40	0	0	30	243.3
1617	1	40	26.5089					2	4	0	1	2	1	5000	4	1195	1201.83	2	10000	3	2660	2660	2																					20	1	1	18
1618	1	20	20.0351					2	3	1	2	3	1	5000	4	1201	1207.9	2	10000	2	2640	2622.99	1											21097.5	3	6025	6025	3						25	1	1	25
1619	1	49	24.0445					3	7	0	2	1	1	5000	3	1290	1290	2	10000	2	2907	2886.39	2																					23	0	0	15
1620	1	47	21.8359	1		1		1	2	0	2	2	1						10000	2	2450	2435.35	2	8045	2	1985	1933.03	2											42195	4	10747	10860.4	1	86	1	1	50
1621	1	24	19.503					2	3	1	2	1	1	5000	2	1626	1568.39	3	10000	3	3972	3972	2																					45	1	0	30
1622	1	30	22.2178					2	5	0	1	2	1											8045	3	1800	1800	1	16090	3	3776	3776	1											60	1	1	50
1623	1	43	23.1481	1				2	3	0	2	1	1	5000	3	1050	1050	2																					42195	3	10200	10200	2	45	0	0	40
1624	1	38	19.0438	1	1	1	1	1	2	0	2	1	1						10000	4	2590	2643.45	1											21097.5	3	5980	5980	1	42195	4	13069	13237.1	1	75	1	1	65
1625	1	52	18.4659	1	1	1	1	1	1	1	2	2	1											8045	2	2408	2331.95	2						21097.5	3	6720	6720	2	42195	2	15120	15038.8	2	45	1	1	45
1627	1	29	21.7049					2	3	1	2	1	2						10000	3	3305	3305	2											21097.5	3	7322	7322	2						18	0	1	13
1629	1	27	22.8059					2	3	1	3	1	1	5000	4	1980	1998.82	3																21097.5	2	9300	9164.28	2						12	0	0	8
1630	1	16	18.3308					2	3	0	2	1	2	5000	3	1146	1146	2																21097.5	2	5762	5709.61	3						55	1	1	45
1631	1	42	25.8981					2	5	0	2	2	1	5000	3	1470	1470	2																21097.5	3	7560	7560	2						30	1	1	25
1632	1	37	24.9719					2	4	0	2	2	1	5000	4	1218	1225.1	3																21097.5	4	5685	5838.93	2						34	0	1	25
1633	1	41	31.4564	1				1	1	0	2	3	2	5000	3	1500	1500	3																					42195	2	17623	17512.8	2	42	0	0	25	259.892
1634	1	37	22.1946					2	4	1	2	2	1	5000	2	1467	1419.95	4																21097.5	4	7320	7577.2	3						25	1	0	12
1635	1	31	23.6496	1	1			1	1	1	2	1	1																					21097.5	3	6359	6359	1	42195	4	13230	13402.3	2	50	1	1	30
1636	1	33	25.9686	1				1	2	0	2	3	2	5000	3	1230	1230	3																					42195	3	12540	12540	2	40	0	1	35	213.511
1637	1	70	20.4841	1	1	1	1	1	1	1	2	2	2																16090	4	5692	5979.27	2	21097.5	4	7510	7780.97	2	42195	3	16691	16691	2	48	1	1	40
1638	1	19	19.6409					2	3	0	2	1	2	5000	4	969	973.487	1						8045	3	1665	1665	1																72	1	1	60
1639	1	26	25.0438	1				1	2	0	2	2	1	5000	3	1100	1100	1																					42195	4	12000	12141.6	1	40	0	1	28
1640	1	38	24.441					1	1	1	2	1	2	5000	3	2180	2180	2																21097.5	3	10763	10763	2						20	0	0	18
1641	1	36	21.0616					2	4	0	2	1	1						10000	2	2315	2301.91	2											21097.5	4	4980	5097.72	2						48	1	1	40
1642	1	70	26.4234	1				2	4	0	1	3	2						10000	2	3480	3450.51	4																42195	3	17340	17340	2	35	1	1	20	285.237
1643	1	47	22.1661	1				1	2	0	2	2	1	5000	3	1221	1221	2																					42195	3	12265	12265	1	55	1	1	45
1644	1	33	24.5262					2	3	0	1	1	2	5000	4	1092	1097.7	1	10000	2	2653	2635.83	2											21097.5	2	5520	5471.9	1						18	1	1	37
1645	1	50	25.974					1	1	0	1	3	1	5000	4	1260	1267.6	1	10000	3	2580	2580	1																					20	0	1	15
1646	1	51	22.5394					2	4	1	2	2	1	5000	3	1732	1732	2																21097.5	3	8073	8073	2						42	1	1	35
1647	1	45	22.7607					3	7	0	1	1	1	5000	3	1042	1042	2	10000	4	2177	2214.64	2											21097.5	2	4801	4764.57	2						55	0	1	45
1648	1	41	25.1651					2	3	1	2	1	3	5000	3	1673	1673	2	10000	3	3198	3198	2											21097.5	2	7980	7879.86	2						21	0	0	15
1649	1	47	18.3238	1		1		2	3	1	2	1	2	5000	3	1427	1427	2											16090	2	4584	4453.23	2						42195	4	12184	12330	2	80	0	0	50
1650	1	35	21.9468	1	1	1	1	2	3	1	2	1	3											8045	3	2686	2686	1						21097.5	3	7121	7121	2	42195	2	17870	17756.7	2	30	0	0	25
1651	1	28	18.7553	1				2	3	0	1	2	1	5000	4	1005	1009.83	2											16090	5	3192		1						42195	4	9742	9835.1	2	75	1	1	70
1652	1	52	21.6619					2	5	1	1	1	1											8045	4	2570	2703.88	1						21097.5	4	7421	7685.48	2						18	0	0	12
1653	1	35	23.6496					2	5	1	1	2	1	5000	3	1342	1342	2	10000	3	2815	2815	2											21097.5	2	6472	6405.98	1						30	0	0	25
1654	1	33	26.5695					2	4	1	2	3	1						10000	2	3636	3603.82	1											21097.5	4	8220	8545.74	1						35	1	1	25
1655	1	19	21.2498					2	4	0	1	3	1	5000	3	1074	1074	2						8045	4	1724	1783.23	2																35	0	1	30
1656	1	33	22.0466	1				2	3	0	2	3	1	5000	4	1122	1128.02	2																					42195	3	11055	11055	2	35	1	1	28	200.257
1657	1	41	23.1677					1	1	1	1	3	1	5000	4	1596	1608.21	2	10000	4	3447	3542.32	1											21097.5	1	7822		1						32	1	1	22
1658	1	34	22.1946					1	2	1	2	3	1	5000	1	1653		2	10000	2	3439	3410.2	2											21097.5	2	8909	8784.37	2						28	1	0	20
1659	1	46	23.1205					2	4	1	2	2	1	5000	3	1556	1556	2																21097.5	3	6976	6976	2						47	1	1	25
1660	1	35	27.5482	1	1			2	3	1	2	2	1																					21097.5	3	9293	9293	3	42195	3	22186	22186	2	24	1	0	18
1661	1	42	20.419					1	1	1	2	3	1	5000	3	1520	1520	2																21097.5	3	7500	7500	2						40	1	1	27
1662	1	31	19.973	1	1	1	1	1	2	1	2	3	2	5000	4	1451	1461.08	1																21097.5	4	6612	6821.14	2	42195	4	14307	14508.7	2	42	0	0	30	251.097	252.999
1663	1	35	22.6506					2	3	0	2	1	1	5000	4	1217	1224.09	2						8045	4	2152	2245.08	2											42195	1	19813		3	48	0	0	40
1664	1	48	20.419	1		1		3	6	1	2	3	3	5000	2	1237	1203.38	2											16090	4	4173	4325.35	2						42195	3	11777	11777	2	56	1	1	43	211.497	214.281
1665	1	43	18.2876	1				1	1	0	1	3	2											8045	3	2300	2300	2											42195	2	15243	15160.5	2	49	0	1	45	231.573
1666	1	42	22.0337	1	1	1	1	3	6	1	2	2	1	5000	3	1251	1251	1																21097.5	2	5863	5808.77	1	42195	2	12619	12562.4	1	38	1	1	35
1667	1	28	22.5779					2	3	0	2	1	1	5000	4	1730	1744.35	2	10000	3	3240	3240	2																					12	0	0	10
1668	1	37	22.5498					2	3	1	2	3	1	5000	3	1879	1879	3	10000	4	4050	4182.23	3																					14	0	0	6
1669	1	36	24.7372					2	4	1	1	3	1	5000	3	1716	1716	2																21097.5	4	8192	8515.48	2						24	0	0	20
1670	1	43	24.5511					2	3	0	2	2	2	5000	3	1110	1110	3	10000	3	2350	2350	3																					40	0	1	35
1671	1	56	24.4898	1	1	1	1	2	3	0	2	1	1						10000	3	3330	3330	1											21097.5	2	7440	7352.88	2	42195	4	16440	16706.9	2	35	1	1	25
1672	1	31	21.3068					2	3	1	2	3	1	5000	4	1234	1241.29	1																21097.5	4	5744	5901.18	1						42	1	0	36
1673	1	60	20.9276	1	1	1	1	2	3	0	2	3	1																16090	2	6840	6552.86	2	21097.5	3	9000	9000	2	42195	2	17880	17766.6	1	40	0	0	33	315.729	327.343
1674	1	60	27.5559	1				1	1	0	1	2	1						10000	4	3600	3704.1	3																42195	3	17520	17520	2	33	0	0	26
1675	1	35	22.1946	1				1	2	1	2	2	1	5000	3	1336	1336	2																21097.5	5	5900		2	42195	3	13127	13127	1	50	1	0	45
1676	1	37	23.9192					2	5	0	2	1	1						10000	4	3128	3206.3	2	8045	4	2490	2615.47	2						21097.5	4	6976	7209.21	2						12	0	0	20
1677	1	40	23.8496	1				2	3	0	1	2	1						10000	3	2355	2355	2																42195	3	11100	11100	2	55	1	1	40
1678	1	43	20.2938					2	4	1	2	3	1	5000	2	1514	1463.93	2	10000	2	2878	2857.8	2											21097.5	4	6025	6198.17	1						27	1	1	20
1679	1	25	24.0445					3	7	0	2	3	1	5000	4	935	939.177	2						8045	4	1627	1679.65	2																15	0	0	12
1680	1	35	23.6496					3	8	1	2	2	1	5000	3	1483	1483	1											16090	2	5580	5387.42	2	21097.5	2	7076	6997.15	1						30	1	1	25
1681	1	45	21.3244					2	3	0	2	1	1	5000	4	1187	1193.74	2	10000	3	2520	2520	2											21097.5	3	5966	5966	2						10	1	1	20
1682	1	36	23.4508					3	6	0	2	1	3	5000	3	1082	1082	2																21097.5	3	5209	5209	2						45	1	0	40
1683	1	52	26.4234					2	3	0	2	2	2	5000	3	1547	1547	3						8045	4	2701	2849.27	3																20	0	0	14
1684	1	44	24.5956	1	1			2	3	1	2	3	1																					21097.5	2	6600	6531.35	1	42195	2	14400	14326.3	2	40	1	0	30	241.723
1685	1	30	21.3068	1	1	1	1	1	2	1	2	2	2						10000	3	2972	2972	1											21097.5	3	6663	6663	1	42195	3	14043	14043	1	34	1	1	18
1686	1	20	20.7792					2	3	0	2	2	2	5000	4	936	940.186	1	10000	4	1947	1977.05	1						16090	1	3527		2											90	0	1	80
1687	1	31	24.5511	1	1			2	5	0	2	2	3																					21097.5	2	5644	5593.72	2	42195	4	13321	13495.7	3	50	0	0	25
1688	1	46	26.7324					2	5	0	1	2	1	5000	3	1180	1180	2						8045	3	1980	1980	2						21097.5	2	5918	5862.75	2						22	0	1	20
1689	1	30	24.1875	1	1			2	3	1	2	2	1																					21097.5	3	5640	5640	2	42195	2	11940	11889.3	2	65	1	0	55
1690	1	27	21.0438					2	4	0	1	3	3	5000	1	1025		2	10000	2	2118	2107.04	1											21097.5	3	4804	4804	3						12	0	0	10
1691	1	27	20.9194	1		1		2	4	0	2	1	1	5000	4	1010	1014.88	2											16090	2	3553	3473.93	1						42195	3	9665	9665	1	85	0	1	75
1692	1	59	24.193					3	8	0	2	2	1	5000	3	1410	1410	2						8045	3	2535	2535	1																30	0	1	15
1693	1	30	32.0561					1	2	1	2	3	2	5000	3	2230	2230	3	10000	5	4561		2											21097.5	3	10437	10437	2						18	0	1	13
1694	1	46	20.312					3	7	1	1	1	1	5000	4	1415	1424.59	2											16090	3	4831	4831	2	21097.5	4	6789	7009.68	2						30	1	1	20
1695	1	45	25.7995	1	1			2	4	1	2	2	1																					21097.5	4	8055	8367.55	2	42195	3	17340	17340	2	34	0	0	20
1696	1	30	21.3068					2	5	1	2	1	3	5000	3	1364	1364	2	10000	2	2935	2914	3						16090	4	4762	4961.42	4											0	0	0	0
1697	1	43	22.5064	1		1		1	2	0	2	1	1	5000	2	1208	1175.91	3											16090	2	4114	4008.36	1						42195	4	12274	12422.2	2	52	1	0	37
1698	1	47	25.0438	1				1	1	1	2	1	1	5000	5	1454		2	10000	3	4080	4080	3																42195	3	15660	15660	1	40	0	0	25
1699	1	28	24.0445	1				2	4	0	2	1	1	5000	3	1271	1271	1																					42195	3	13378	13378	2	41	1	1	35
1700	1	48	26.6335					1	2	1	2	3	1						10000	3	3404	3404	1						16090	3	5571	5571	1	21097.5	4	7097	7338.51	1						41	0	0	35
1701	1	43	23.3061					2	4	0	2	2	1	5000	3	1307	1307	2	10000	3	2920	2920	2																					24	0	1	18
1702	1	39	26.4193	1	1			1	2	0	1	1	1																					21097.5	3	6300	6300	2	42195	4	13520	13700	2	55	0	1	45
1703	1	44	25.2048					2	3	0	2	1	2	5000	3	1364	1364	1	10000	2	2874	2853.86	1																					10	0	1	8
1704	1	34	23.0824					1	2	1	2	1	2											8045	4	2358	2470.22	2						21097.5	4	6126	6305.11	2						30	0	1	26
1705	1	40	21.3859					2	3	1	2	3	1	5000	4	1630	1642.74	1											16090	2	5686	5486.16	1											21	0	0	15
1706	1	27	22.6079					3	8	0	2	2	1	5000	2	1170	1139.87	1						8045	3	2079	2079	2						21097.5	3	6335	6335	3						51	1	1	45
1707	1	45	23.5923	1	1			2	3	0	2	1	1																					21097.5	2	4980	4940.82	2	42195	3	11040	11040	2	55	0	1	40
1708	1	26	24.6933					2	4	1	2	2	1	5000	4	1785	1800.28	2	10000	3	3900	3900	3																					8	0	1	7
1709	1	30	22.4467	1				2	4	0	2	1	2						10000	4	2560	2612.21	2																42195	3	13200	13200	2	30	1	0	22
1710	1	36	25.8981					2	4	0	2	1	1						10000	2	2674	2656.56	2						16090	3	4595	4595	2											22	1	0	18
1711	1	43	25.974	1				1	1	0	2	1	3	5000	3	1440	1440	3																					42195	3	14220	14220	1	36	0	0	28
1712	1	34	23.3742	1	1	1	1	1	2	1	2	3	2						10000	3	2570	2570	2											21097.5	3	5353	5353	1	42195	2	12070	12018.2	2	60	0	1	45	197.076	198.497
1713	1	41	22.5826					2	3	0	3	2	1						10000	3	2730	2730	2											21097.5	2	6198	6137.42	3						70	0	0	50
1714	1	29	20.5227	1	1	1	1	2	4	1	2	2	1	5000	3	1220	1220	1																21097.5	2	5849	5795.02	2	42195	2	13326	13262.9	2	31	0	1	20
1715	1	29	25.0438					2	3	1	2	3	2	5000	3	1684	1684	2																21097.5	3	8892	8892	4						11	0	0	6
1716	1	32	21.3859					2	3	1	2	2	1	5000	4	1697	1710.81	2						8045	3	2478	2478	2						21097.5	4	6976	7209.21	1						26	1	1	25
1717	1	28	24.8316					2	3	0	1	1	2	5000	3	1064	1064	2	10000	2	2273	2260.38	2	8045	3	1784	1784	2																55	1	1	50
1718	1	43	23.435					2	3	0	2	2	1						10000	3	2863	2863	2						16090	3	4699	4699	2	21097.5	3	6334	6334	2						60	0	0	58
1719	1	30	22.5183	1	1			1	1	0	1	3	1																					21097.5	2	6060	6002.08	2	42195	3	13440	13440	1	60	0	0	40	219.835
1720	1	27	20.1562	1	1	1	1	3	6	1	2	3	1	5000	3	1335	1335	2																21097.5	2	6247	6185.47	2	42195	2	13328	13264.9	2	42	0	0	35	228.003	228.501
1721	1	26	25.922					1	2	1	2	2	1	5000	3	2130	2130	2																21097.5	3	9779	9779	2						24	0	0	18
1722	1	45	24.272					2	5	0	1	2	2						10000	4	2690	2747.7	2											21097.5	3	5952	5952	2						60	1	1	37
1723	1	35	25.2735	1	1			1	2	0	2	2	1																					21097.5	4	6780	7000.08	3	42195	2	14354	14280.8	1	35	1	1	25
1724	1	48	22.4552	1	1			2	5	1	2	1	3																					21097.5	4	7629	7908.79	1	42195	2	18667	18543.4	2	14	1	0	18
1725	1	29	21.6619					2	3	0	2	1	1	5000	3	1044	1044	3	10000	4	2165	2202.22	2																					47	1	1	40
1726	1	31	22.7607	1		1		2	3	0	2	1	1	5000	2	1200	1168.33	3	10000	3	2250	2250	1																42195	3	12300	12300	2	50	0	0	15
1727	1	29	20.2515					2	3	1	2	3	1	5000	4	1175	1181.6	1																21097.5	3	5447	5447	1						54	1	1	47
1728	1	41	26.732	1	1			2	5	0	2	1	3																					21097.5	4	5852	6015.23	2	42195	2	13032	12971.6	2	22	0	1	20
1729	1	35	22.8734					1	2	1	2	3	1	5000	3	1416	1416	2	10000	3	2990	2990	2											21097.5	2	7035	6957.06	3						9	1	1	25
1730	1	47	23.7496					1	2	1	2	3	1	5000	3	1644	1644	1	10000	2	3585	3553.71	1											21097.5	1	7685		1						23	1	1	20
1731	1	26	22.894					3	6	1	2	3	3	5000	3	1532	1532	4						8045	2	2513	2430.29	3	16090	4	5220	5460.59	3											15	0	0	7
1732	1	28	21.4965	1	1			1	1	0	2	1	2																					21097.5	2	4459	4427.56	2	42195	3	9363	9363	1	71	1	1	64
1733	1	53	23.3742	1		1		2	3	0	2	3	1	5000	3	1318	1318	4											16090	3	4231	4231	2						42195	2	13321	13257.9	2	47	0	1	40	208.664	215.186
1734	1	24	20.9194					2	3	0	2	1	1																16090	4	3930	4064.84	2	21097.5	2	5330	5285.14	2						30	1	1	30
1735	1	23	22.9134	1				2	4	0	2	3	2	5000	4	1228	1235.21	2																					42195	2	17587	17477.3	3	20	0	0	20	220.794
1736	1	33	22.3577	1		1		2	3	0	1	2	2	5000	3	1122	1122	2	10000	3	2388	2388	2																42195	3	11467	11467	2	78	0	1	60
1737	1	61	22.9134					2	3	0	2	3	1	5000	2	1375	1333.58	2	10000	3	2880	2880	2																					35	0	1	30
1738	1	44	20.8699	1				1	2	1	2	1	1	5000	3	1462	1462	2																					42195	4	15458	15693.7	2	50	0	0	40
1739	1	34	22.9277					1	1	0	2	2	1						10000	2	3750	3715.78	1						16090	2	6124	5892.82	1											20	0	0	15
1740	1	32	24.4898	1	1	1	1	3	7	0	2	3	1	5000	3	985	985	2																21097.5	2	4528	4495.58	1	42195	2	9787	9752.92	1	83	0	1	65	163.859	161.554
1741	1	45	24.099	1	1			2	4	1	2	1	3																					21097.5	2	7755	7660.4	2	42195	2	17634	17523.7	2	40	0	0	30
1742	1	37	24.3787					3	6	1	1	1	1	5000	4	1616	1628.52	2																21097.5	2	7920	7821.35	2						30	0	1	30
1743	1	42	24.1875	1		1		3	7	1	3	2	2	5000	3	1630	1630	2	10000	4	3442	3537.04	3																42195	2	17171	17066.4	2	44	0	1	28
1744	1	36	30.2949	1	1			1	2	1	2	3	1																					21097.5	2	7380	7294.27	1	42195	3	16585	16585	1	40	0	0	30	266.187
1745	1	38	20.8699					3	6	1	2	2	2	5000	4	1295	1303.03	2	10000	3	2698	2698	1											21097.5	2	6288	6225.66	2						30	1	1	26
1746	1	31	28.2004					2	3	0	2	3	1	5000	3	1350	1350	2	10000	3	2770	2770	2											21097.5	2	7131	7050.93	2						15	1	0	20
1747	1	25	26.732					2	4	1	2	3	1	5000	3	1621	1621	2						8045	3	2915	2915	3																18	1	0	12
1748	1	24	22.1718					1	2	1	2	3	3	5000	2	2297	2183.7	2	10000	3	4926	4926	4																					1	0	0	0
1749	1	31	21.8182	1	1	1	1	1	2	1	2	3	1	5000	3	1447	1447	3																21097.5	3	6841	6841	3	42195	4	14526	14734	2	30	0	0	25	254.663	254.611
1750	1	34	21.7452	1				1	1	0	2	2	1						10000	2	2693	2675.31	2											21097.5	1	6000		3	42195	3	12180	12180	2	50	0	0	40
1751	1	39	20.9035					2	4	0	2	3	1	5000	4	985	989.636	2						8045	3	1610	1610	2																50	0	0	30
1752	1	44	25.1651					2	3	0	2	1	1	5000	4	1541	1552.38	2																21097.5	4	7197	7445.48	2						15	1	1	30
1753	1	26	23.1872					2	4	0	2	2	3	5000	4	1453	1463.11	3	10000	4	2776	2837.49	3											21097.5	4	7570	7845.4	3						22	1	0	18.64
1754	1	16	20.8117					2	4	1	2	3	3	5000	4	1086	1091.64	2						8045	4	2225	2324.65	3																26	1	1	21
1755	1	34	23.0834	1	1			3	8	0	1	3	1	5000	1	1247		2																21097.5	4	5690	5844.2	1	42195	2	12484	12428.6	2	50	1	1	38	215.635
1756	1	39	35.745					3	6	0	2	3	2	5000	3	1578	1578	3	10000	3	3578	3578	3																					20	0	1	14
1757	1	65	22.3024					2	5	0	2	1	2	5000	3	1223	1223	2											16090	1	4283		2	21097.5	2	5713	5661.49	2						55	1	1	40
1758	1	30	21.7576					2	3	1	2	2	2						10000	2	3581	3549.78	3											21097.5	4	7667	7949.63	3						22	0	0	18
1759	1	28	25.1826					3	8	0	2	2	1	5000	2	1144	1115.18	1	10000	2	2321	2307.85	1																					20	0	0	20
1760	1	46	20.8699	1	1	1	1	1	1	1	2	1	1	5000	4	1440	1449.93	2																21097.5	3	7080	7080	1	42195	2	15600	15513.6	1	50	1	1	48
1761	1	30	21.2331	1				1	1	1	2	2	3											8045	3	2880	2880	3											42195	3	15780	15780	1	43	0	0	30
1762	1	35	22.0195					2	3	1	2	1	1	5000	3	1590	1590	2																21097.5	2	8160	8055.32	2						25	1	1	20
1763	1	36	19.295					1	1	1	2	2	2	5000	3	1352	1352	4						8045	4	2291	2396.79	4											42195	1	13693		2	40	0	0	32
1764	1	47	22.8435					3	7	0	2	1	1	5000	3	1200	1200	1																21097.5	3	5860	5860	1						40	1	1	35
1765	1	36	23.5923					1	2	0	2	3	1	5000	4	1440	1449.93	1	10000	3	3014	3014	2											21097.5	2	7680	7587.21	2						24	1	0	15
1766	1	27	24.5423					1	2	0	2	1	1	5000	4	1420	1429.66	1	10000	4	2860	2925.31	1											21097.5	4	6866	7091.79	1						22	0	0	18
1767	1	38	21.8716					2	3	1	2	1	2	5000	3	1753	1753	2																21097.5	2	8604	8487.71	2						16	1	0	13
1768	1	29	29.2184					2	3	0	2	1	3																16090	2	5460	5275.48	2	21097.5	2	7511	7422.22	2						23	1	0	18
1769	1	37	23.2713	1	1	1	1	1	2	1	2	2	2	5000	4	1267	1274.68	2																21097.5	2	5817	5763.61	1	42195	4	12826	12987.9	1	50	1	1	35
1770	1	35	21.7047	1				1	2	1	2	1	1						10000	4	2690	2747.7	2																42195	3	13484	13484	1	50	0	1	30
1771	1	41	22.4769	1	1	1	1	2	3	1	2	2	2											8045	2	2700	2604.75	1						21097.5	3	7980	7980	2	42195	4	17280	17575.1	2	40	0	0	20
1772	1	48	27.4961					2	3	0	2	2	1						10000	4	2646	2701.81	2											21097.5	2	6070	6011.89	1						25	1	1	18
1773	1	28	20.7749					2	4	0	2	3	2	5000	3	1295	1295	3																21097.5	4	5890	6055.39	1	42195	1	13712		1	48	1	1	42		221.937
1774	1	60	24.5511					2	4	0	2	3	1	5000	3	1698	1698	3	10000	2	3419	3390.53	2																					5.5	0	1	10
1775	1	37	24.8506					3	7	0	1	1	1	5000	3	1270	1270	2																21097.5	2	5798	5744.96	1						25	0	1	24
1776	1	27	28.7684					1	2	1	2	1	1	5000	4	1990	2009.02	3	10000	3	3930	3930	3																					12	0	0	10
1777	1	40	22.9078					2	5	0	2	3	1	5000	3	1154	1154	1	10000	3	2476	2476	2											21097.5	4	5318	5452.46	1						43	1	1	31
1778	1	34	20.7632					3	7	0	2	2	1	5000	4	1110	1115.89	2						8045	3	1850	1850	2						21097.5	2	5275	5231.06	1						70	1	1	55
1779	1	34	23.6772	1	1			1	1	0	2	2	1																					21097.5	3	6227	6227	2	42195	3	13028	13028	1	55	0	1	40
1780	1	33	20.3216	1				1	2	0	2	1	1						10000	3	2650	2650	4																42195	4	13450	13628.1	2	50	0	0	25
1781	1	35	22.6079	1		1		3	7	0	1	1	1	5000	2	998	975.998	2	10000	3	2065	2065	2																42195	4	9335	9420.45	1	72	1	1	60
1782	1	23	22.1946					3	6	1	2	2	2	5000	3	1285	1285	2																21097.5	3	6360	6360	3						36	0	1	30
1783	1	48	27.9887					1	2	0	2	3	2																16090	2	6133	5901.15	2	21097.5	4	7820	8114.24	1						22	0	1	18
1784	1	56	25.954					2	3	0	2	1	1						10000	3	3100	3100	2						16090	4	4864	5072.24	1	21097.5	3	6691	6691	1						28	1	1	20
1785	1	26	19.7956	1	1	1	1	2	3	1	2	2	1																16090	4	4483	4659.31	2	21097.5	2	6101	6042.29	2	42195	2	13523	13458	2	48	1	1	40
1786	1	28	34.2266					2	3	1	2	2	1	5000	2	3679	3396.72	3	10000	3	7085	7085	3																					50	0	0	30
1787	1	30	27.2181					1	2	0	1	2	1	5000	4	1246	1253.43	1	10000	4	2761	2821.82	1											21097.5	3	6530	6530	2						10	0	1	15
1788	1	25	21.7047					2	4	1	1	3	1						10000	4	3665	3772.95	3						16090	4	6005	6325.62	3											16	0	0	14
1789	1	40	25.3777	1	1			3	7	0	2	2	1																					21097.5	2	5790	5737.1	2	42195	4	11691	11825.3	2	55	1	1	45
1790	1	41	22.9048	1				2	4	1	2	1	1	5000	4	1382	1391.14	2																					42195	2	14940	14860.7	2	35	1	0	30
1791	1	35	22.9632					2	4	0	2	2	1						10000	4	2418	2464.52	1											21097.5	4	5397	5535.54	1						65	1	1	60
1792	1	37	26.546					2	3	0	2	2	1	5000	4	1218	1225.1	1																21097.5	4	6002	6173.83	1						25	1	1	22
1793	1	30	21.3859					2	3	1	2	2	3	5000	3	2100	2100	2	10000	4	3720	3831.26	2											21097.5	4	7620	7899.12	3						45	1	1	35
1794	1	41	29.2969					1	1	1	2	1	1	5000	2	2220	2113.99	3	10000	3	4128	4128	2											21097.5	4	8931	9316.85	2						13	0	0	17
1795	1	29	24.5262	1	1	1	1	2	3	0	2	3	2	5000	3	1300	1300	2																21097.5	4	6020	6192.88	1	42195	2	14761	14683.6	2	45	1	1	27	232.113	229.838
1796	1	47	29.569					2	4	0	3	3	1	5000	3	1540	1540	3	10000	2	3350	3322.67	4																					0	0	0	0
1797	1	38	23.2007					2	5	0	1	2	1	5000	3	1127	1127	2						8045	2	1891	1843.78	2																45	0	1	40
1798	1	25	24.8356					3	8	0	1	2	1	5000	3	1026	1026	1	10000	4	2198	2236.37	2						16090	4	3816	3943	2											28	1	1	12
1799	1	34	20.5857	1	1	1	1	2	3	0	2	3	1						10000	2	2520	2504.5	1											21097.5	3	6480	6480	2	42195	2	14280	14207.6	2	45	0	1	30	240.051	232.427
1800	1	35	22.3341					2	5	0	2	1	1	5000	4	1045	1050.22	1	10000	2	2196	2184.22	1											21097.5	3	4733	4733	1						62	1	1	55
1801	1	46	22.1768	1	1	1	1	3	6	0	3	1	1						10000	4	2497	2546.64	1											21097.5	2	5860	5805.82	2	42195	2	12702	12644.7	2	37	0	0	27
1802	1	33	21.4965	1	1	1	1	2	3	0	2	1	1	5000	2	1065	1039.98	1																21097.5	3	4722	4722	1	42195	2	10527	10487.6	1	52	0	1	45
1803	1	25	22.1946	1	1	1	1	2	3	1	1	2	1	5000	2	1236	1202.43	2																21097.5	2	5728	5676.22	1	42195	3	12495	12495	1	38	1	1	30
1804	1	34	22.5394	1	1	1	1	2	3	0	2	1	1	5000	2	1138	1109.48	2																21097.5	3	5177	5177	2	42195	2	11225	11180.2	2	43	1	1	30
1805	1	34	21.7452	1	1	1	1	2	4	1	2	1	2	5000	2	1360	1319.47	2																21097.5	3	6193	6193	2	42195	3	14050	14050	2	50	1	1	45
1806	1	35	30.5535	1	1	1	1	1	2	0	2	1	2	5000	4	1408	1417.49	3																21097.5	2	7440	7352.88	4	42195	3	14264	14264	2	17	0	0	30
1807	1	45	25.2475	1				2	4	0	2	1	1	5000	3	1226	1226	2																					42195	2	12882	12823	1	40	1	1	35
1808	1	32	22.1957	1				1	2	0	1	2	1	5000	3	1073	1073	1																					42195	2	10764	10722.8	1	102	1	1	68
1809	1	36	23.1677	1	1			1	2	1	2	2	1																					21097.5	2	7083	7004	1	42195	2	17101	16997.2	2	60	1	1	40
1810	1	67	26.7161					2	4	0	2	2	1	5000	3	1923	1923	3	10000	4	3639	3745.4	3											21097.5	3	9125	9125	3						25	0	0	20
1811	1	36	25.637	1	1	1	1	2	3	0	2	2	2						10000	2	2509	2493.64	2											21097.5	3	5510	5510	2	42195	4	11580	11711.8	1	55	0	1	40
1812	1	32	23.3061	1		1		2	4	0	1	2	2	5000	2	1225	1192.02	1											16090	2	4711	4572.99	1						42195	3	15310	15310	1	48	1	1	40
1813	1	35	24.3787	1	1	1	1	1	1	1	2	1	2						10000	2	3699	3665.7	2											21097.5	3	8708	8708	1	42195	2	21290	21129.4	2	37	1	0	32
1814	1	24	21.8182					2	3	0	2	2	1						10000	4	2910	2977.65	2											21097.5	3	6360	6360	2						35	0	1	25
1815	1	25	25.9516					3	8	0	2	1	1	5000	2	1320	1281.78	3						8045	2	2190	2126.92	2																15	0	0	10
1816	1	35	24.4898					2	4	0	2	3	1	5000	3	1185	1185	2																21097.5	4	5736	5892.74	1						15	0	0	12
1817	1	29	24.0421					3	6	1	1	3	1	5000	2	1749	1682.53	4	10000	3	3246	3246	2																					15	0	0	12
1818	1	39	22.4467	1				1	2	0	2	3	3	5000	3	1324	1324	4																21097.5	5	6010		3	42195	3	14161	14161	2	50	0	0	45	223.15
1819	1	32	23.7899	1				2	4	0	2	3	1	5000	4	1116	1121.96	1																					42195	2	11384	11337.9	1	75	1	1	50	191.611
1820	1	28	17.5307	1				2	3	1	1	1	2											8045	4	2040	2123.46	3											42195	3	12180	12180	2	60	0	0	50
1821	1	26	23.9702					2	3	1	2	2	1	5000	1	1644		2	10000	2	3349	3321.68	2											21097.5	2	7326	7241.52	2						33	1	0	25
1822	1	35	24.0445					3	8	0	2	2	1						10000	3	3282	3282	2	8045	3	2530	2530	2						21097.5	3	7929	7929	3						15	0	0	10
1823	1	43	21.5169					2	3	1	2	1	1						10000	2	4080	4039.53	3											21097.5	2	8220	8113.79	2						17	0	0	15
1824	1	41	22.9632					2	5	0	2	2	1	5000	2	1178	1147.47	1																21097.5	4	5403	5541.85	2						26	1	1	20
1825	1	30	20.1321					2	4	1	2	2	1						10000	3	2922	2922	2											21097.5	4	7057	7295.75	2						26	1	1	17
1826	1	32	21.2121					2	4	1	2	3	1	5000	3	1365	1365	2																21097.5	2	6528	6460.83	2						35	1	1	30
1827	1	27	25.7457	1				2	3	0	1	1	1											8045	4	1785	1848.57	2											42195	4	11058	11178.1	2	45	1	1	25
1828	1	35	22.8571					1	2	0	2	1	1						10000	3	2418	2418	2	8045	3	1973	1973	2																30	1	1	30
1829	1	24	20.7792	1	1	1	1	2	4	0	2	3	2											8045	2	1735	1695.17	1						21097.5	2	4860	4822.68	2	42195	2	11951	11900.2	3	50	1	1	40	181.283	176.72
1830	1	24	20.7792	1	1			2	4	0	2	3	1																					21097.5	3	5000	5000	3	42195	4	10448	10555.2	1	55	1	1	40	187.208
1831	1	18	20.202					1	2	1	2	3	1	5000	4	1169	1175.54	1	10000	4	2778	2839.58	2																					48	1	1	45
1832	1	41	24.3787	1	1			2	3	0	2	1	1																					21097.5	3	6872	6872	1	42195	4	14130	14326.7	2	21	0	1	30
1833	1	28	20.9185	1	1	1	1	3	7	0	1	1	2	5000	3	1089	1089	1																21097.5	3	5054	5054	1	42195	2	10717	10676.1	1	63	1	0	55
1834	1	30	21.5377	1	1	1	1	1	2	1	2	2	1						10000	2	2595	2578.57	2											21097.5	3	5647	5647	2	42195	4	12499	12652.7	2	47	1	1	35
1835	1	28	27.4972					2	5	0	1	1	1	5000	2	1180	1149.36	2	10000	2	2622	2605.22	2											21097.5	4	5946	6114.59	3						30	0	1	25
1836	1	40	24.4898					2	4	0	2	1	1	5000	3	1338	1338	2																21097.5	3	6562	6562	2						23	0	0	20
1837	1	45	23.4918	1	1			2	3	0	2	1	2																					21097.5	3	6930	6930	2	42195	2	19200	19069.3	2	40	1	1	35
1838	1	30	25.9516					1	2	1	2	2	1	5000	4	1875	1891.87	1											16090	4	4256	4414.59	2											12	0	0	10
1839	1	50	29.5757					1	2	0	2	2	1																16090	4	6319	6675.02	1	21097.5	2	8862	8738.67	1						32	1	1	20
1840	1	46	19.4767					2	3	0	2	3	1	5000	4	1042	1047.19	2	10000	2	2214	2202.03	2																					60	1	1	45
1841	1	30	29.0909					2	5	0	2	3	1	5000	3	1490	1490	2	10000	4	3397	3489.54	2											21097.5	3	7707	7707	2						24	1	1	18
1842	1	61	23.94					2	4	0	2	2	1	5000	3	1470	1470	1																21097.5	2	7380	7294.27	1						35	1	1	25
1843	1	38	25.2319	1				2	5	0	1	2	2						10000	3	2340	2340	1																42195	4	11380	11507.2	1	61	0	0	40
1844	1	39	20.7792					2	4	0	2	3	1	5000	4	1020	1024.97	2	10000	3	2100	2100	2											21097.5	3	4620	4620	2						75	1	1	55
1845	1	49	24.1355					3	8	0	2	1	2						10000	4	2363	2407.41	2						16090	3	4187	4187	2	21097.5	4	5326	5460.87	2						31	1	1	25
1846	1	60	22.6643					2	3	0	1	2	1	5000	3	2140	2140	2	10000	4	3551	3652.25	2																					10	0	0	8
1848	1	29	17.8646	1	1	1	1	3	6	1	2	2	1	5000	2	1247	1212.84	2																21097.5	4	5868	6032.14	2	42195	2	14238	14166	2	50	1	1	40
1849	1	44	25.637					2	3	0	2	1	2	5000	3	1218	1218	2	10000	2	2470	2455.11	2											21097.5	2	5622	5572.11	2						50	0	0	30
1850	1	32	22.8059					2	3	1	2	3	2																16090	2	4811	4667.16	2	21097.5	3	6840	6840	2						21	0	0	20
1851	1	40	25.5207					1	2	0	2	1	1						10000	4	2760	2820.78	2											21097.5	4	6540	6744.54	2						11	0	0	20
1852	1	32	23.7082	1	1	1	1	3	7	0	2	3	3	5000	2	1089	1062.85	2																21097.5	3	4808	4808	3	42195	3	10604	10604	4	40	1	1	15	188.576	181.619
1853	1	32	21.7576	1	1	1	1	2	4	1	2	2	2											8045	3	2048	2048	1						21097.5	4	5657	5809.39	1	42195	3	12338	12338	1	45	1	1	38
1854	1	34	18.3655	1				2	5	1	2	3	3	5000	4	1096	1101.74	2																					42195	3	11040	11040	1	70	1	1	55	186.994
1855	1	28	21.5919	1	1			2	4	0	2	3	1																					21097.5	2	5568	5519.06	1	42195	4	12180	12325.9	1	57	1	1	47	201.653
1856	1	37	19.8657	1	1			1	2	1	1	1	1																					21097.5	3	5440	5440	2	42195	3	11426	11426	1	60	1	1	40
1857	1	21	21.8359					2	3	0	2	3	1	5000	3	1192	1192	2						8045	2	2001	1948.2	2																25	0	0	18
1858	1	35	22.1768	1	1	1	1	3	6	0	2	3	1																16090	2	3726	3639.14	2	21097.5	4	4808	4917.64	1	42195	3	10994	10994	2	65	1	1	50	181.405	177.663
1859	1	33	25.8203	1	1			2	3	0	2	3	1	5000	1	1253		1																21097.5	3	5355	5355	1	42195	3	12581	12581	2	18	0	0	35	200.755
1860	1	31	21.1535	1	1	1	1	2	5	0	2	1	1																16090	3	3509	3509	2	21097.5	3	4501	4501	1	42195	3	10391	10391	1	85	1	1	70
1861	1	43	25.954	1	1	1	1	2	3	0	2	1	1	5000	4	1210	1217	2																21097.5	4	6180	6362.33	2	42195	3	14820	14820	2	65	0	0	40
1862	1	35	19.0771					2	3	1	2	2	1	5000	2	1333	1294.04	2						8045	3	2213	2213	2						21097.5	3	6116	6116	2						60	1	0	50
1863	1	26	25.1632	1	1	1	1	3	6	1	2	1	2						10000	4	2698	2756.05	3											21097.5	3	5731	5731	1	42195	3	11744	11744	1	48	1	1	35
1864	1	35	24.3787					2	3	0	1	2	1	5000	4	890	893.783	1	10000	3	1879	1879	1	8045	4	1500	1544.64	1																70	1	1	60
1865	1	44	23.0834	1	1			2	4	0	1	2	1																16090	1	4716		1	21097.5	3	5938	5938	1	42195	2	12798	12739.8	1	52	1	1	40
1866	1	24	17.8725	1				3	8	0	2	1	1											8045	2	1721	1681.8	2											42195	3	10577	10577	2	75	1	1	60
1867	1	45	25.6803					2	5	0	2	2	1	5000	4	1430	1439.79	3																21097.5	3	6918	6918	2						25	0	0	20
1868	1	28	25.8996					2	3	0	2	3	1																16090	4	3728	3849.12	1	21097.5	2	5105	5063.83	2						90	0	1	70
1869	1	36	26.6125	1	1	1	1	3	8	0	1	2	1	5000	4	1188	1194.75	3																21097.5	3	5520	5520	1	42195	2	13560	13494.7	2	20	0	0	10
1870	1	29	21.6891	1	1			2	3	1	2	2	1																					21097.5	4	6246	6432.3	1	42195	2	14004	13934.3	1	40	1	1	35
1871	1	42	25.922					1	1	0	2	1	1	5000	2	1314	1276.12	4																21097.5	3	5783	5783	2						50	1	1	35
1872	1	27	22.0195	1		1		1	2	0	2	3	2	5000	4	1159	1165.42	2	10000	3	2504	2504	2																42195	3	12312	12312	1	60	1	1	40	205.82	212.979
1873	1	64	27.0379					2	3	0	2	3	2						10000	2	2898	2877.52	2	8045	3	2441	2441	2						21097.5	4	6811	7033.13	1						32	1	1	25
1874	1	53	22.4125	1		1		2	5	0	2	2	1	5000	3	1289	1289	1	10000	4	2694	2751.88	1																42195	3	13289	13289	1	48	1	1	40
1875	1	33	22.4467	1				2	3	0	2	2	1	5000	4	1125	1131.05	1																					42195	4	12480	12633.2	1	52	0	1	38
1876	1	47	22.5394					1	1	1	2	1	1	5000	3	1525	1525	2																21097.5	4	7089	7329.96	1						14	0	0	14
1877	1	28	18.88					1	2	1	2	3	1						10000	3	3496	3496	2											21097.5	3	8301	8301	2						20	0	0	15
1878	1	21	21.9798	1	1			1	2	0	2	2	1																					21097.5	3	5310	5310	1	42195	3	11580	11580	2	50	1	1	35
1879	1	40	25.4797					2	5	0	2	1	1	5000	2	1386	1343.92	2	10000	3	2940	2940	2											21097.5	3	6782	6782	1						25	0	0	20
1880	1	42	30.5465					2	3	0	2	2	3	5000	2	1680	1618.58	3	10000	2	3300	3273.47	1																					20	0	0	15
1881	1	29	23.5993	1				2	3	0	1	2	1	5000	3	1072	1072	2																					42195	2	10782	10740.7	1	68	1	1	62
1882	1	28	25.2319	1	1			1	2	0	1	3	1																					21097.5	4	5490	5633.42	2	42195	2	12964	12904.3	2	60	0	0	45	206.041
1883	1	32	31.3891	1	1	1	1	2	3	0	2	1	1						10000	3	2681	2681	1											21097.5	2	6748	6676.26	3	42195	2	14896	14817.2	2	60	1	1	40
1884	1	42	23.2778					3	7	0	2	1	1	5000	3	1200	1200	2	10000	3	3000	3000	2																					30	0	0	25
1885	1	46	25.9686	1	1	1	1	1	2	0	2	2	1						10000	3	2385	2385	2											21097.5	2	5356	5310.7	1	42195	3	11433	11433	1	60	1	1	45
1886	1	30	34.2266					1	1	1	2	2	2	5000	2	2109	2013.1	3											16090	3	7731	7731	4	21097.5	1	10067		2						15	0	0	10
1887	1	32	22.0348	1		1		1	2	0	2	1	1	5000	3	1380	1380	2	10000	3	2580	2580	2																42195	4	14460	14666.1	3	35	0	0	30
1888	1	43	22.7273					1	2	1	2	2	1						10000	3	3109	3109	2											21097.5	3	8375	8375	2						18	1	1	15
1889	1	35	19.4945					3	7	1	2	2	1											8045	2	2130	2070.28	2						21097.5	2	6020	5962.84	2						41	1	1	37
1890	1	46	18.6363					3	7	1	2	2	1	5000	4	1248	1255.45	2	10000	4	2620	2674.71	2											21097.5	4	5804	5964.53	2						35	1	1	30
1891	1	32	23.0824					2	3	1	2	3	1	5000	3	1839	1839	2																21097.5	3	8123	8123	2						21	0	0	16
1892	1	30	20.9841	1				2	3	0	2	2	2																16090	3	4500	4500	2						42195	3	13200	13200	2	31	1	1	22
1893	1	41	23.6772	1	1	1	1	2	3	0	2	1	1	5000	4	1192	1198.8	2																21097.5	3	5628	5628	2	42195	3	15160	15160	2	50	1	0	35
1894	1	33	24.5028	1	1	1	1	2	3	1	2	2	1	5000	4	1470	1480.35	3																21097.5	4	6745	6962.78	2	42195	3	14822	14822	2	40	0	0	35
1895	1	44	23.7477	1	1			2	3	0	1	1	1																					21097.5	3	5580	5580	2	42195	4	11680	11814.1	1	50	1	1	40
1896	1	37	26.2784					1	1	1	2	3	2	5000	2	1563	1509.7	2																21097.5	3	7636	7636	2	42195	1	16382		2	30	0	0	25		282.009
1897	1	45	21.9468					2	4	1	2	1	1	5000	3	1392	1392	2						8045	4	2301	2407.74	2						21097.5	4	6977	7210.28	4						32	0	1	30
1898	1	35	21.8855					4	10	0	2	2	1	5000	3	1134	1134	1	10000	3	2445	2445	1																					37	1	1	31
1899	1	62	23.2419					2	3	0	2	2	1						10000	3	3972	3972	1						16090	3	6635	6635	1	21097.5	3	8857	8857	1						33	1	1	31
1900	1	27	22.5394					2	5	0	2	2	1	5000	2	1395	1352.38	3						8045	2	2430	2352.58	3	16090	2	5280	5107.25	3											10	0	0	10
1901	1	35	20.2441					1	2	1	2	2	1	5000	2	1580	1525.55	2																21097.5	2	7003	6925.76	2						24	0	0	22
1902	1	35	23.821	1	1			1	1	1	2	1	2																					21097.5	4	7920	8221.96	3	42195	3	18010	18010	2	40	0	0	25
1903	1	24	20.312					2	4	1	1	1	1	5000	3	1424	1424	2	10000	3	3268	3268	2																					6	0	1	10
1904	1	29	26.986					1	1	0	2	1	1	5000	4	1425	1434.72	1	10000	3	3330	3330	1																					12	0	0	8
1905	1	31	23.8751					2	4	1	2	3	2	5000	3	2122	2122	3	10000	4	4942	5140.32	3																					15.11	1	0	5
1906	1	34	25.5361	1	1	1	1	1	2	0	2	3	2	5000	3	1190	1190	3																21097.5	4	5460	5601.83	2	42195	3	12900	12900	2	55	1	0	45	205.037	204.556
1907	1	23	22.136					2	5	1	2	2	2	5000	2	1600	1544.19	2	10000	4	3594	3697.75	4																					8.7	0	1	7.5
1908	1	31	28.2599					3	7	0	1	3	2						10000	2	2898	2877.52	2											21097.5	3	6126	6126	2						30	0	0	25
1909	1	52	22.2866					2	3	0	2	1	1						10000	3	3489	3489	2						16090	3	5820	5820	2											10	0	0	9
1910	1	35	23.0056					1	1	1	2	2	2						10000	4	3997	4125.74	4											21097.5	2	8806	8684.22	4						8	0	0	12
1911	1	31	23.8048	1		1		3	7	1	2	3	1	5000	3	1418	1418	2	10000	2	2954	2932.73	1																42195	3	14329	14329	1	62	1	1	50	231.139	249.081
1912	1	29	21.8716					2	4	1	2	1	1	5000	2	1860	1785	2						8045	4	3218	3430.7	2																14	0	0	12
1913	1	45	23.8751	1				2	4	0	2	3	2						10000	3	2565	2565	1																42195	3	12007	12007	1	55	1	1	50	206.249
1914	1	30	26.7161					3	6	0	2	1	1						10000	2	2910	2889.35	2											21097.5	4	6660	6872.24	1						26	1	1	20
1915	1	28	22.9392	1	1	1	1	2	5	0	2	1	1	5000	4	1236	1243.31	1																21097.5	3	6542	6542	3	42195	3	15960	15960	2	40	0	1	30
1916	1	36	23.2323					2	3	1	2	1	1	5000	4	1468	1478.32	1						8045	3	2534	2534	2						21097.5	4	3580	3640.43	2						5	0	0	20
1917	1	25	23.6496	1	1	1	1	2	3	1	1	2	1	5000	4	1240	1247.36	2																21097.5	2	5840	5786.19	3	42195	2	12355	12300.7	2	65	1	1	50
1918	1	25	23.883					1	1	0	2	3	1	5000	4	1530	1541.22	2																21097.5	2	7890	7792.09	2	42195	1	21915		2	35	0	1	30		286.385
1919	1	35	23.2419	1		1		2	3	0	2	1	1	5000	4	1230	1237.24	2	10000	3	3540	3540	3																42195	4	13260	13433.1	1	50	0	0	30
1920	1	30	22.9134					2	3	0	2	2	1						10000	2	2802	2782.85	2						16090	2	4590	4458.89	2	21097.5	2	6345	6281.53	2						25	0	1	20
1921	1	47	18.9394					2	5	1	1	1	1	5000	3	1740	1740	4	10000	4	3360	3450.51	3																					15	0	0	15
1922	1	53	26.4017					2	5	0	1	1	1	5000	3	2160	2160	3	10000	3	4320	4320	3																					10	1	0	9
1923	1	45	28.3404					2	3	1	2	2	2											8045	3	2943	2943	1	16090	4	6725	7129.71	2											20	0	0	13
1924	1	29	24.193	1		1		2	5	0	2	2	3	5000	2	1185	1154.11	2						8045	2	1958	1907.42	1											42195	4	12065	12208.1	1	55	1	1	50
1925	1	62	24.2376					2	5	0	2	3	1	5000	3	1308	1308	2	10000	3	2733	2733	2																					45	1	1	40
1926	1	28	23.3742	1	1	1	1	2	4	1	2	3	2											8045	3	2296	2296	3						21097.5	2	6404	6339.35	3	42195	3	13719	13719	2	40	0	1	30	235.457	235.782
1927	1	34	28.9425					2	5	0	2	3	1	5000	2	1356	1315.7	1																21097.5	4	6605	6813.69	2						30	1	0	20
1928	1	51	21.8855					3	6	0	2	1	1	5000	3	1195	1195	2	10000	3	2490	2490	2																					45	1	0	40
1929	1	44	23.569	1	1			1	2	0	1	3	1																					21097.5	4	6609	6817.95	2	42195	3	13779	13779	1	55	1	1	45	242.649
1930	1	33	25.2478					2	4	0	2	1	1	5000	4	1330	1338.47	2																21097.5	2	6600	6531.35	1						40	0	1	30
1931	1	45	28.5502	1	1	1	1	2	4	0	2	2	3	5000	4	1609	1621.41	1																21097.5	3	8280	8280	2	42195	3	19740	19740	4	55	0	1	40
1932	1	34	25.0438					2	3	0	1	1	2	5000	4	1081	1086.59	1																21097.5	4	5013	5132.31	1						54	1	1	48
1933	1	44	23.2383					1	2	1	2	2	1	5000	4	1628	1640.7	2	10000	4	3366	3456.84	2											21097.5	4	7634	7914.16	3						28	0	0	23
1934	1	30	25.7457					2	3	1	2	3	1	5000	3	1896	1896	3																21097.5	3	9300	9300	3						12	0	0	8
1935	1	43	23.906	1	1	1	1	2	3	0	1	3	2	5000	4	1295	1303.03	1																21097.5	2	5977	5920.65	1	42195	2	13242	13179.7	1	62	1	1	45	215.103	217.076
1936	1	59	21.3792					2	3	1	2	3	2						10000	2	3540	3509.49	2						16090	1	5639		2	21097.5	2	7261	7178	2						42	1	1	35
1937	1	43	26.064					3	6	0	2	3	1	5000	2	1635	1576.77	1	10000	2	3370	3342.34	1											21097.5	3	7815	7815	1						32	1	1	28
1938	1	35	30.5751					2	5	0	2	3	3	5000	3	2343	2343	3																21097.5	3	11762	11762	2						6	0	0	6
1939	1	54	28.2004					2	3	0	1	3	1	5000	3	1560	1560	2																21097.5	4	6960	7192.12	2						6	0	0	25
1940	1	28	22.4467					2	4	0	2	3	1	5000	3	1510	1510	3	10000	2	3013	2990.87	2											21097.5	2	8032	7930.56	2						20	1	0	15
1941	1	30	46.9082	1		1		2	3	1	2	3	1	5000	3	1701	1701	1											16090	3	6382	6382	2						42195	3	18856	18856	2	26	0	1	20	313.049	323.475
1942	1	35	35.9474					2	4	0	2	3	2	5000	3	1389	1389	2											16090	3	4904	4904	2											18	0	0	15
1943	1	31	21.3068	1	1			2	5	1	2	1	1																					21097.5	2	6208	6147.23	3	42195	2	14401	14327.3	1	40	1	1	35
1944	1	44	21.5213					2	3	0	3	1	2	5000	3	1484	1484	2																21097.5	3	7773	7773	2						24.2	1	1	15
1945	1	48	24.9597					3	6	0	2	1	1	5000	4	1073	1078.5	1						8045	3	1850	1850	1						21097.5	2	5520	5471.9	1						36	0	0	32
1946	1	37	22.5779					3	7	0	1	2	1	5000	4	964	968.44	1	10000	4	2010	2042.04	1																					93	1	1	87
1947	1	29	24.3787					2	3	1	2	2	1	5000	3	1650	1650	2																21097.5	2	7965.5	7865.72	2						23	1	0	20
1948	1	45	25.9362	1		1		2	3	0	1	2	1	5000	3	1260	1260	2	10000	2	2580	2563.76	2																42195	3	12305	12305	2	45	1	1	30
1949	1	39	24.858	1	1	1	1	3	7	1	2	1	3						10000	4	2657	2713.28	2											21097.5	3	5877	5877	2	42195	3	13350	13350	2	54	1	1	45
1950	1	61	23.4375	1		1		2	3	0	2	2	1	5000	4	1395	1404.32	2	10000	3	2992	2992	2																42195	3	13811	13811	2	65	0	0	59
1951	1	33	22.2178					2	4	0	2	1	2	5000	4	1557	1568.62	4	10000	4	2394	2439.59	3											21097.5	3	4748	4748	4						50	1	0	35
1952	1	39	23.0056					2	3	0	1	3	3	5000	3	1230	1230	3																21097.5	4	5880	6044.82	3						20	0	0	20
1953	1	33	25.9516					2	4	0	1	3	2	5000	3	1065	1065	2	10000	3	2250	2250	2	8045	3	1815	1815	2																10	1	1	30
1954	1	39	23.7477	1	1	1	1	2	4	0	2	2	1						10000	3	2700	2700	3											21097.5	3	6300	6300	2	42195	3	14400	14400	2	50	1	1	35
1955	1	26	29.0002					2	4	1	2	2	2	5000	3	1490	1490	3																21097.5	2	8221	8114.76	2						20	0	0	12
1956	1	30	21.8612	1	1	1	1	2	3	1	2	3	2						10000	3	3472	3472	2											21097.5	3	6602	6602	1	42195	2	14040	13970	2	38	0	1	32	242.934	252.984
1957	1	38	19.6476	1	1			2	4	0	2	1	1																					21097.5	4	4375	4465.6	2	42195	4	9888	9983.93	2	65	1	1	60
1958	1	41	26.2031					2	3	0	2	3	1	5000	2	1585	1530.21	2																21097.5	3	7008	7008	2						12	0	0	18
1959	1	32	21.0761					2	5	0	1	2	2	5000	3	1250	1250	2																21097.5	3	5744	5744	2						30	0	0	25
1960	1	47	21.5194	1	1			1	1	1	2	2	2																					21097.5	3	8208	8208	1	42195	3	17778	17778	2	32	0	0	30
1961	1	41	25.974	1	1	1	1	2	3	0	2	3	2											8045	4	1421	1461	3						21097.5	2	6348	6284.47	1	42195	3	14820	14820	2	42	0	0	35	231.19	215.61
1962	1	23	21.8182					2	4	1	2	3	1											8045	3	2892	2892	2						21097.5	2	7573	7482.76	2						35	0	0	25
1963	1	27	20.0111					2	3	0	2	2	1	5000	3	1322	1322	2																21097.5	3	6262	6262	2						35	1	0	30
1964	1	30	21.8716					3	7	0	2	2	1	5000	2	1380	1338.28	2						8045	3	2400	2400	2																35	0	1	25
1965	1	56	22.5183					1	2	1	2	3	1	5000	2	1920	1840.19	2																21097.5	3	10200	10200	3						50	0	0	50
1966	1	39	27.1193	1	1			2	3	1	2	2	1																					21097.5	2	7020	6942.39	1	42195	2	15420	15335.6	1	40	1	1	30
1967	1	29	25.9689					2	3	0	1	2	1						10000	3	3196	3196	2						16090	2	4987	4832.61	3											42	1	1	36
1968	1	48	23.0824					2	5	1	1	3	2	5000	4	1803	1818.6	3																21097.5	3	8657	8657	3						7	0	0	14
1969	1	31	25.2525					2	3	1	2	3	2						10000	2	2955	2933.71	2											21097.5	2	6600	6531.35	2						10	0	0	20
1970	1	51	22.2055					2	3	1	2	1	1						10000	3	3290	3290	2	8045	3	2704	2704	2	16090	2	5630	5434.01	2											5.5	1	1	18
1971	1	34	25.8121					3	6	0	1	2	1	5000	4	1623	1635.63	3	10000	4	3600	3704.1	2																					5	0	0	14
1972	1	39	22.3776					2	4	1	2	1	1	5000	3	1741	1741	2	10000	3	4260	4260	2											21097.5	3	8889	8889	2						18	0	0	10
1973	1	33	21.3068					1	2	1	2	3	1	5000	2	1110	1082.85	2	10000	3	2240	2240	1						16090	4	3803	3929.12	2											70	1	1	60
1974	1	25	26.738					2	3	0	2	3	1						10000	2	2776	2757.2	2	8045	3	2161	2161	2						21097.5	3	6693	6693	2						37	1	0	30
1975	1	29	26.2741					3	7	0	2	2	1	5000	3	1176	1176	3						8045	4	1916	1989.44	3																17	1	0	15
1976	1	32	24.2882					2	4	0	2	2	1	5000	4	1187	1193.74	2																21097.5	3	5982	5982	2						24	0	0	12
1977	1	29	20.8117					1	2	1	2	1	2						10000	3	3090	3090	1											21097.5	3	6673	6673	1						70	1	0	60
1978	1	45	25.5103					2	3	0	2	1	1	5000	3	1815	1815	2	10000	2	3612	3580.24	2																					20	0	0	15
1979	1	27	25.8981	1				2	3	0	1	3	2	5000	2	1238	1204.32	2											16090	1	4320		2						42195	4	14278	14478.9	1	45	0	0	24	214.073
1980	1	30	22.0195	1	1	1	1	2	5	0	2	1	1	5000	2	1161	1131.33	4																21097.5	2	5301	5256.63	3	42195	3	12315	12315	4	32	0	0	25
1981	1	31	22.3577					2	4	0	2	3	1	5000	3	1162	1162	1	10000	3	2386	2386	1											21097.5	3	5315	5315	1						40	0	1	36
1982	1	46	22.0195					4	9	0	2	1	1	5000	3	898	898	2						8045	3	1478	1478	2						21097.5	3	4926	4926	3						45	1	1	30
1983	1	42	24.7099					2	5	1	2	1	2	5000	3	1708	1708	3						8045	3	2674	2674	2																23	0	0	20
1984	1	37	24.0195					2	3	0	1	2	1						10000	4	2428	2474.91	1	8045	4	1920	1993.75	1						21097.5	4	5315	5449.31	1						25	1	1	20
1985	1	26	23.83					2	4	0	2	3	2	5000	4	1200	1206.89	4											16090	4	3844	3972.9	2	21097.5	3	5280	5280	1						35	0	0	30
1986	1	63	21.7452					2	3	0	2	1	1	5000	3	1714	1714	2																21097.5	3	7936	7936	2						35	1	1	30
1987	1	36	23.821	1	1	1	1	2	3	1	2	3	1	5000	3	1665	1665	1																21097.5	4	7785	8076.57	1	42195	3	18120	18120	1	40	0	0	30	290.572	298.251
1988	1	24	21.8612					2	3	1	2	3	1						10000	3	2620	2620	1											21097.5	2	5995	5938.31	2						20	0	1	25
1989	1	57	23.9827	1	1	1	1	2	3	0	2	2	1											8045	3	2051	2051	1						21097.5	2	6542	6474.55	2	42195	2	13067	13006.3	1	68	0	1	45
1990	1	51	23.0366					2	3	0	2	2	1	5000	4	1280	1287.84	2	10000	4	2510	2560.17	1											21097.5	3	6619	6619	2						52	1	1	35
1991	1	51	17.567					2	3	1	1	3	1	5000	4	1282	1289.87	2																21097.5	4	6190	6372.93	2						42	1	1	40
1992	1	38	25.8121	1	1	1	1	1	2	0	2	1	1	5000	4	1361	1369.87	1																21097.5	4	6600	6808.37	1	42195	4	14370	14573.5	2	40	1	1	30
1993	1	26	26.3795	1	1			1	2	1	2	1	1																					21097.5	3	6298	6298	1	42195	3	13874	13874	2	50	0	1	35
1994	1	56	25.2525					1	2	0	2	1	1	5000	4	1380	1389.12	2	10000	3	2160	2160	2											21097.5	2	6120	6060.93	2						36	0	0	32
1995	1	32	22.3621					3	8	0	1	3	1	5000	2	1072	1046.66	2						8045	4	1786	1849.64	2						21097.5	2	5110	5068.75	2						55	1	1	50
1996	1	37	22.3621					2	5	0	2	3	2	5000	4	1015	1019.92	2						8045	3	1731	1731	2						21097.5	3	5046	5046	1						48	1	1	40
1997	1	65	23.9069					1	2	0	2	1	3	5000	3	2220	2220	4	10000	3	3286	3286	2											21097.5	2	8563	8447.8	2						40	0	1	18
1998	1	41	27.4583	1	1			2	3	0	2	3	1																					21097.5	3	6930	6930	1	42195	3	15570	15570	3	30	0	1	20	260.654
1999	1	35	22.3776					2	3	1	2	1	1	5000	3	1422	1422	1	10000	2	3136	3112.03	2											21097.5	4	6793	7013.94	1						30	1	1	22
2000	1	35	20.8699					2	5	1	2	3	1	5000	3	1499	1499	1																21097.5	3	7378	7378	1						21	1	0	18
2001	1	42	26.4017	1	1	1	1	1	2	0	1	2	1						10000	4	2467	2515.45	1											21097.5	3	5610	5610	1	42195	3	12896	12896	1	55	0	0	40
2002	1	42	19.9095	1				2	4	0	1	2	1						10000	2	2898	2877.52	1																42195	4	11311	11436.7	1	55	1	1	35
2003	1	47	28.0491					1	2	1	2	3	1	5000	3	1712	1712	2	10000	3	3565	3565	2											21097.5	2	8471	8358.25	2						30	1	1	25
2004	1	24	24.6914					3	7	0	2	3	1	5000	3	1500	1500	2	10000	2	3000	2978.06	2	8045	3	2400	2400	2																9	1	1	4.5
2005	1	17	20.1697					2	3	0	1	1	1	5000	2	1052	1027.58	2	10000	2	2314	2300.92	2	8045	3	1785	1785	2																68	1	1	52
[truncated: 304 more rows]

## Sheet: Sheet2
Variable	Description	Responses
id	Unique ID for each runner
adjusted	If adjusted = 1, these runners had races dropped if they were "very fast" or "very difficult", and times for "fast" or "difficult" races were adjusted.	1 = race times adjusted, included in prediction models
	If adjusted = 0, these runners did not have at least 2 races of 2 different distances after excluding "very fast" or "very difficult" races. Therefore, they could not be included in the prediction models.	0 = race times not adjusted, not included in prediction models
age	Runner's age
bmi	Runner's BMI
cohort1	Identifies runners who ran at least a marathon	1 = yes
cohort2	Identifies runners who ran at least a marathon and a half-marathon	1 = yes
cohort3	Identifies runners who ran a marathon and two other races	1 = yes
cohort4	Identifies runners who ran a marathon, a half-marathon and one other race	1 = yes
endurancespeed	Are you an endurance runner or a speed demon? (Endurance = 1, Speed Demon = 10)
endurancecat	Are you an endurance runner or a speed demon? (categorized)	1 = Strictly endurance (1, 2)
		2 = Mostly endurance (3, 4, 5)
		3 = Mostly speed (6, 7, 8)
		4 = Strictly speed (9, 10)
female	Female runner	0 = no (male)
		1 = yes (female)
footwear	What type of footwear do you wear?	1 = Minimalist
		2 = Normal running shoe
		3 = Vibrams, sandals, or barefoot
group	Groups 1 and 2 were used to build prediction models, group 3 was used to validate
injury	Did you have an injury?	1 = Nothing that stopped me running
		2 = Yes, I had to take a few days off
		3 = Yes, I had to take more than a week off from running
k5_d	5K: Distance (meters)
k5_di	5K: How difficult was the course?	1 = Very difficult
		2 = Difficult
		3 = Average
		4 = Fast
		5 = Very fast
k5_ti	5K: Raw time (seconds)
k5_ti_adj	5K: Time (seconds), adjusted for race difficulty
k5_ti_min	5K: Raw time (minutes)
k5_ti_min_adj	5K: Time (minutes), adjusted for race difficulty
k5_tr	5K: How do you rate your fitness at the time of the race?	1 = As fit as I've ever been
		2 = Good shape, but I could have trained a bit harder
		3 = I'd trained some
		4 = I wasn't well prepared
k10_d	10K: Distance (meters)
k10_di	10K: How difficult was the course?	1 = Very difficult
		2 = Difficult
		3 = Average
		4 = Fast
		5 = Very fast
k10_ti	10K: Raw time (seconds)
k10_ti_adj	10K: Time (seconds), adjusted for race difficulty
k10_ti_min	10K: Raw time (minutes)
k10_ti_min_adj	10K: Time (minutes), adjusted for race difficulty
k10_tr	10K: How do you rate your fitness at the time of the race?	1 = As fit as I've ever been
		2 = Good shape, but I could have trained a bit harder
		3 = I'd trained some
		4 = I wasn't well prepared
m5_d	5 miles: Distance (meters)
m5_di	5 miles: How difficult was the course?	1 = Very difficult
		2 = Difficult
		3 = Average
		4 = Fast
		5 = Very fast
m5_ti	5 miles: Raw time (seconds)
m5_ti_adj	5 miles: Time (seconds), adjusted for race difficulty
m5_ti_min	5 miles: Raw time (minutes)
m5_ti_min_adj	5 miles: Time (minutes), adjusted for race difficulty
m5_tr	5 miles: How do you rate your fitness at the time of the race?	1 = As fit as I've ever been
		2 = Good shape, but I could have trained a bit harder
		3 = I'd trained some
		4 = I wasn't well prepared
m10_d	10 miles: Distance (meters)
m10_di	10 miles: How difficult was the course?	1 = Very difficult
		2 = Difficult
		3 = Average
		4 = Fast
		5 = Very fast
m10_ti	10 miles: Raw time (seconds)
m10_ti_adj	10 miles: Time (seconds), adjusted for race difficulty
m10_ti_min	10 miles: Raw time (minutes)
m10_ti_min_adj	10 miles: Time (minutes), adjusted for race difficulty
m10_tr	10 miles: How do you rate your fitness at the time of the race?	1 = As fit as I've ever been
		2 = Good shape, but I could have trained a bit harder
		3 = I'd trained some
		4 = I wasn't well prepared
mh_d	Half-marathon: Distance (meters)
mh_di	Half-marathon: How difficult was the course?	1 = Very difficult
		2 = Difficult
		3 = Average
		4 = Fast
		5 = Very fast
mh_ti	Half-marathon: Raw time (seconds)
mh_ti_adj	Half-marathon: Time (seconds), adjusted for race difficulty
mh_ti_min	Half-marathon: Raw time (minutes)
mh_ti_min_adj	Half-marathon: Time (minutes), adjusted for race difficulty
mh_tr	Half-marathon: How do you rate your fitness at the time of the race?	1 = As fit as I've ever been
		2 = Good shape, but I could have trained a bit harder
		3 = I'd trained some
		4 = I wasn't well prepared
mf_d	Marathon: Distance (meters)
mf_di	Marathon: How difficult was the course?	1 = Very difficult
		2 = Difficult
		3 = Average
		4 = Fast
		5 = Very fast
mf_ti	Marathon: Raw time (seconds)
mf_ti_adj	Marathon: Time (seconds), adjusted for race difficulty
mf_ti_min	Marathon: Raw time (minutes)
mf_ti_min_adj	Marathon: Time (minutes), adjusted for race difficulty
mf_tr	Marathon: How do you rate your fitness at the time of the race?	1 = As fit as I've ever been
		2 = Good shape, but I could have trained a bit harder
		3 = I'd trained some
		4 = I wasn't well prepared
max	What was the maximum number of miles you ran in a single week during training?
sprint	Did you run sprints, intervals, or hill repeats most weeks during training?	0 = no
		1 = yes
tempo	Did you do tempo runs most weeks during training?	0 = no
		1 = yes
typical	What was your typical weekly mileage leading up to this race?
model1_time	Marathon time (minutes) predicted by model 1 (using 1 prior race)
model2_time	Marathon time (minutes) predicted by model 2 (using 2 prior races)
